# Supplementary material for: Quantitative measurement of antibiotic resistance in Mycobacterium tuberculosis reveals genetic determinants of resistance and susceptibility in a target gene approach
Source: Research Square preprint supplement (doi:10.21203/rs.3.rs-3378915/v1), 2023-10-02
Supplement: Supplementary file 1 [file fda9717d71eed1ebd6fd2bc4.xlsx]

## Sheet: Table S1 
Table S1: Total high quality samples and proportion of resistant samples by drug. Intermediate and resistant cutoffs are from Fowler et al. 2021
DRUG	High-quality Phenotypes	Resistant	Intermediate	Susceptible	% Not Susceptible	Susceptible Conc.	Intermediate Conc.	Resistant Conc.
AMI	8973	598		8375	6.66444	<=1		>=2
BDQ	8536	71		8465	0.831771	<=0.25		>=0.5
CFZ	7763	106		7657	1.36545	<=0.25		>=0.5
DLM	8095	85		8010	1.05003	<=0.12		>=0.25
EMB	7506	1460	892	5154	31.3349	<=2	4	>=8
ETH	8821	1189	570	7062	19.941	<=2	4	>=8
INH	9519	3966	502	5051	46.9377	<=0.1	0.2, 0.4	>=0.8
KAN	9333	760		8573	8.14315	<=4		>=8
LEV	7774	1179		6595	15.1659	<=1		>=8
LZD	7141	76		7065	1.06428	<=1		>=2
MXF	6785	991		5794	14.6057	<=1		>=2
RIF	8955	3448		5507	38.5036	<=0.5		>=1
RFB	10042	3195		6847	31.8164	<=0.12		>=0.25

## Sheet: Table S2
Table S2: Number of isolates with 1-10+ nonsynonymous mutations in target genes by drug.
DRUG	# Mutations	Isolates
INH	1	2627
INH	2	2965
INH	3	3230
INH	4	2726
INH	5	1005
INH	6	194
INH	7	41
INH	8	24
INH	9	29
INH	10	19
INH	>10	620
ETH	1	5641
ETH	2	2718
ETH	3	894
ETH	4	128
ETH	5	28
ETH	6	27
ETH	7	21
ETH	8	21
ETH	9	18
ETH	10	10
ETH	>10	1310
AMI	1	2716
AMI	2	2680
AMI	3	1927
AMI	4	2013
AMI	5	2078
AMI	6	1799
AMI	7	750
AMI	8	253
AMI	9	86
AMI	10	37
AMI	>10	865
KAN	1	2716
KAN	2	2680
KAN	3	1927
KAN	4	2013
KAN	5	2078
KAN	6	1799
KAN	7	750
KAN	8	253
KAN	9	86
KAN	10	37
KAN	>10	865
EMB	1	4100
EMB	2	3410
EMB	3	1400
EMB	4	450
EMB	5	113
EMB	6	36
EMB	7	17
EMB	8	94
EMB	9	470
EMB	10	386
EMB	>10	1036
RIF	1	3901
RIF	2	3308
RIF	3	1763
RIF	4	535
RIF	5	185
RIF	6	49
RIF	7	9
RIF	8	5
RIF	9	9
RIF	10	4
RIF	>10	3166
RFB	1	3901
RFB	2	3308
RFB	3	1763
RFB	4	535
RFB	5	185
RFB	6	49
RFB	7	9
RFB	8	5
RFB	9	9
RFB	10	4
RFB	>10	3166
BDQ	1	3874
BDQ	2	2887
BDQ	3	6389
BDQ	4	1051
BDQ	5	151
BDQ	6	27
BDQ	7	12
BDQ	8	12
BDQ	9	7
BDQ	10	16
BDQ	>10	757
CFZ	1	3597
CFZ	2	2495
CFZ	3	5761
CFZ	4	1982
CFZ	5	335
CFZ	6	61
CFZ	7	29
CFZ	8	12
CFZ	9	6
CFZ	10	20
CFZ	>10	886
MXF	1	657
MXF	2	203
MXF	3	7569
MXF	4	4759
MXF	5	443
MXF	6	118
MXF	7	20
MXF	>10	22
LEV	1	657
LEV	2	203
LEV	3	7569
LEV	4	4759
LEV	5	443
LEV	6	118
LEV	7	20
LEV	>10	22
LZD	1	4229
LZD	2	958
LZD	3	172
LZD	4	44
LZD	5	38
LZD	6	16
LZD	7	25
LZD	8	13
LZD	9	24
LZD	10	25
LZD	>10	1122
DLM	1	5233
DLM	2	1231
DLM	3	213
DLM	4	53
DLM	5	24
DLM	6	35
DLM	7	15
DLM	8	5
DLM	9	12
DLM	10	10
DLM	>10	829

## Sheet: Table S3
Table S3: No-interaction model results for 13 drugs in this study. All MICs are reported in log2 space. Mutations that have significant effects (BH_CORRECTED_P<0.05) after Benjamini-Hochberg correction are highlighted in green.
DRUG	MUTS	GENE	POSITION	COEF	SE	Z	RAW_P	COUNTS	ci_hi	ci_lo	BH_CORRECTED_P	HOMOPLASY	ECOFF
AMI	rrs_a1401g	rrs	1401	6.78266	0.0818105	82.907	0	495	6.94301	6.62232	0	TRUE	2.28427
AMI	aftB_V320M	aftB	320	3.72854	0.734388	5.07707	3.83e-07	2	5.16794	2.28914	1.06729e-05	FALSE	2.28427
AMI	rrs_g1484a	rrs	1484	3.71555	1.67409	2.21945	0.0264562	2	6.99676	0.434339	0.281456	FALSE	2.28427
AMI	rrs_g1484t	rrs	1484	3.55673	0.335237	10.6096	0	9	4.2138	2.89967	0	TRUE	2.28427
AMI	rrs_g1523a	rrs	1523	3.32779	0.708238	4.69869	2.62e-06	2	4.71594	1.93965	6.08422e-05	FALSE	2.28427
AMI	rrs_c1402t	rrs	1402	3.24307	0.644402	5.03268	4.84e-07	4	4.50609	1.98004	1.19007e-05	TRUE	2.28427
AMI	rrs_t1491c	rrs	1491	3.17196	0.993115	3.19395	0.0014034	1	5.11847	1.22546	0.0234648	FALSE	2.28427
AMI	ccsA_L142L	ccsA	142	3.03446	1.02861	2.95007	0.003177	1	5.05052	1.01839	0.0428383	FALSE	2.28427
AMI	whiB6_g-27a	whiB6	-27	2.26634	0.744648	3.04351	0.0023383	2	3.72585	0.806835	0.0325803	TRUE	2.28427
AMI	eis_c-14t	eis	-14	2.161	0.202626	10.6649	0	38	2.55814	1.76385	0	TRUE	2.28427
AMI	aftB_I226I	aftB	226	2.11879	0.650124	3.25905	0.0011179	3	3.39303	0.844543	0.0194701	FALSE	2.28427
AMI	whiB6_F90L	whiB6	90	2.0639	1.49425	1.38123	0.167209	1	4.99263	-0.864829	0.953456	FALSE	2.28427
AMI	whiB6_D37H	whiB6	37	2	1.81295	1.10318	0.269951	1	5.55338	-1.55338	0.953456	FALSE	2.28427
AMI	eis_L331R	eis	331	1.95823	0.818624	2.3921	0.0167521	2	3.56274	0.35373	0.189253	FALSE	2.28427
AMI	fprA_F67F	fprA	67	1.85938	1.0296	1.80593	0.0709295	1	3.8774	-0.158632	0.605072	FALSE	2.28427
AMI	fprA_V406M	fprA	406	1.76706	1.74996	1.00977	0.312605	6	5.19698	-1.66286	0.953456	FALSE	2.28427
AMI	eis_W36R	eis	36	1.69564	1.08214	1.56694	0.117129	2	3.81663	-0.425347	0.844135	FALSE	2.28427
AMI	rrs_g1016t	rrs	1016	1.67534	1.33203	1.25773	0.208489	2	4.28613	-0.935447	0.953456	FALSE	2.28427
AMI	ccsA_R257R	ccsA	257	1.65253	0.763544	2.16429	0.0304424	2	3.14907	0.155982	0.310364	FALSE	2.28427
AMI	fprA_R439R:fprA_G369G	fprA	439	1.57924	1.60814	0.982023	0.326088	4	4.7312	-1.57273	0.953456	FALSE	2.28427
AMI	eis_g-37t	eis	-37	1.5726	0.268178	5.86402	4.52e-09	21	2.09823	1.04697	1.45335e-07	TRUE	2.28427
AMI	whiB6_W76G	whiB6	76	1.55853	2.14742	0.725766	0.467982	1	5.76747	-2.65042	0.953456	FALSE	2.28427
AMI	eis_g-10a	eis	-10	1.54112	0.176459	8.73359	0	47	1.88698	1.19526	0	TRUE	2.28427
AMI	whiB6_R40C	whiB6	40	1.40215	0.874321	1.60371	0.108779	2	3.11582	-0.311516	0.799035	TRUE	2.28427
AMI	whiB6_c-62t	whiB6	-62	1.3681	0.780355	1.75317	0.0795722	2	2.89759	-0.161398	0.641815	FALSE	2.28427
AMI	aftB_V372G	aftB	372	1.32779	0.994989	1.33448	0.182047	1	3.27797	-0.622388	0.953456	FALSE	2.28427
AMI	aftB_R601R	aftB	601	1.31474	1.13627	1.15706	0.247247	1	3.54183	-0.912357	0.953456	FALSE	2.28427
AMI	aftB_N259D	aftB	259	1.2818	0.735506	1.74274	0.0813784	2	2.72339	-0.159793	0.641815	FALSE	2.28427
AMI	whiB6_167_indel	whiB6	167	1.27848	1.01283	1.26228	0.206847	1	3.26363	-0.706669	0.953456	FALSE	2.28427
AMI	rrs_t16c	rrs	16	1.27343	0.824294	1.54487	0.122377	3	2.88904	-0.342187	0.867012	TRUE	2.28427
AMI	aftB_H593Y	aftB	593	1.25183	1.06542	1.17496	0.240009	1	3.34005	-0.836393	0.953456	FALSE	2.28427
AMI	rrs_c1001g	rrs	1001	1.15253	1.03308	1.11563	0.264583	1	3.17736	-0.872305	0.953456	FALSE	2.28427
AMI	whiB6_g-75a	whiB6	-75	1.15253	1.03308	1.11563	0.264583	5	3.17736	-0.872305	0.953456	TRUE	2.28427
AMI	whiB6_F90V	whiB6	90	1.12925	1.00641	1.12207	0.261835	1	3.10181	-0.843303	0.953456	FALSE	2.28427
AMI	whiB6_V23G	whiB6	23	1.11795	1.59079	0.702762	0.482204	10	4.23589	-2	0.953456	FALSE	2.28427
AMI	whiB6_c-14t	whiB6	-14	1.07642	0.466404	2.30791	0.021004	7	1.99057	0.162268	0.231044	TRUE	2.28427
AMI	rrs_t1208c	rrs	1208	1.0657	1.0375	1.02719	0.304332	1	3.09919	-0.967788	0.953456	FALSE	2.28427
AMI	aftB_P478S	aftB	478	1.0519	1.03258	1.01872	0.308338	1	3.07575	-0.971949	0.953456	FALSE	2.28427
AMI	rrs_5_indel	rrs	5	1.0519	0.649218	1.62026	0.105177	3	2.32437	-0.220566	0.799035	FALSE	2.28427
AMI	rrs_c441t	rrs	441	1.0519	1.03258	1.01872	0.308338	1	3.07575	-0.971949	0.953456	FALSE	2.28427
AMI	rrs_a1367g	rrs	1367	1.0519	0.763327	1.37805	0.168188	2	2.54802	-0.44422	0.953456	FALSE	2.28427
AMI	aftB_V352V	aftB	352	1.0394	0.826262	1.25795	0.208408	2	2.65887	-0.580073	0.953456	FALSE	2.28427
AMI	rrs_t16a	rrs	16	1.01261	1.03083	0.982329	0.325937	1	3.03303	-1.00781	0.953456	FALSE	2.28427
AMI	fprA_A174T	fprA	174	1.01069	1.31823	0.766702	0.443259	4	3.59441	-1.57304	0.953456	FALSE	2.28427
AMI	aftB_W22R	aftB	22	1.00754	0.758564	1.32823	0.184103	2	2.49433	-0.47924	0.953456	FALSE	2.28427
AMI	aftB_G384C	aftB	384	0.991034	1.0111	0.980157	0.327008	1	2.97278	-0.990716	0.953456	FALSE	2.28427
AMI	fprA_V251A	fprA	251	0.989037	0.826723	1.19633	0.231566	2	2.60941	-0.63134	0.953456	FALSE	2.28427
AMI	whiB6_D46H:fprA_E430K	whiB6	46	0.953288	0.939038	1.01517	0.310022	2	2.7938	-0.887226	0.953456	FALSE	2.28427
AMI	whiB6_T43P	whiB6	43	0.935954	0.735648	1.27229	0.203272	2	2.37783	-0.505917	0.953456	TRUE	2.28427
AMI	fprA_T329T	fprA	329	0.926894	0.7768	1.19322	0.232783	3	2.44942	-0.595633	0.953456	TRUE	2.28427
AMI	14.siteid	SITEID	14	0.916461	0.105297	8.70357	0	0	1.12284	0.710078	0	FALSE	2.28427
AMI	fprA_R282L:aftB_P358L	fprA	282	0.912383	1.03389	0.882475	0.37752	1	2.93881	-1.11404	0.953456	FALSE	2.28427
AMI	eis_c-8t	eis	-8	0.881225	2.14632	0.410575	0.681384	1	5.08801	-3.32556	0.957401	FALSE	2.28427
AMI	og2mic)	DRUG	18	0.879376	0.0193943	45.3419	0	0	0.917389	0.841363	0	FALSE	2.28427
AMI	rrs_1140_indel	rrs	1140	0.872287	1.70438	0.511791	0.608798	2	4.21288	-2.4683	0.953456	FALSE	2.28427
AMI	whiB6_R54P	whiB6	54	0.871078	0.778757	1.11855	0.263333	5	2.39744	-0.655286	0.953456	TRUE	2.28427
AMI	fprA_V36I	fprA	36	0.869863	1.5184	0.57288	0.566726	2	3.84593	-2.10621	0.953456	FALSE	2.28427
AMI	ccsA_V176V	ccsA	176	0.83498	0.764249	1.09255	0.274592	2	2.33291	-0.662948	0.953456	FALSE	2.28427
AMI	aftB_L201L	aftB	201	0.812935	0.383766	2.11831	0.0341489	21	1.56512	0.0607537	0.339863	FALSE	2.28427
AMI	whiB7_T5T	whiB7	5	0.803336	0.844924	0.950779	0.341717	2	2.45939	-0.852716	0.953456	TRUE	2.28427
AMI	whiB6_P57P	whiB6	57	0.784269	1.03379	0.758632	0.448073	1	2.8105	-1.24197	0.953456	FALSE	2.28427
AMI	aftB_T59T	aftB	59	0.723585	0.855437	0.845866	0.397627	2	2.40024	-0.953072	0.953456	TRUE	2.28427
AMI	whiB6_W76!	whiB6	76	0.719555	0.696883	1.03253	0.301822	3	2.08544	-0.646335	0.953456	TRUE	2.28427
AMI	ccsA_L212L	ccsA	212	0.716084	0.674659	1.0614	0.288507	5	2.03842	-0.606248	0.953456	TRUE	2.28427
AMI	eis_g-10c	eis	-10	0.709943	0.372671	1.90501	0.0567786	12	1.44038	-0.0204926	0.509265	FALSE	2.28427
AMI	aftB_K522R	aftB	522	0.709825	0.224039	3.16832	0.0015332	49	1.14894	0.270709	0.023905	FALSE	2.28427
AMI	fprA_D144D	fprA	144	0.690129	0.994862	0.693693	0.487875	3	2.64006	-1.2598	0.953456	TRUE	2.28427
AMI	aftB_Q322E	aftB	322	0.685685	0.343815	1.99434	0.0461147	33	1.35956	0.0118072	0.448278	FALSE	2.28427
AMI	fprA_Q405!	fprA	405	0.672722	0.830337	0.810179	0.417837	2	2.30018	-0.954739	0.953456	FALSE	2.28427
AMI	eis_c-15g	eis	-15	0.652258	0.433491	1.50466	0.132411	6	1.5019	-0.197385	0.922463	TRUE	2.28427
AMI	aftB_Y298C	aftB	298	0.642073	1.00375	0.639672	0.522386	1	2.60943	-1.32528	0.953456	FALSE	2.28427
AMI	eis_A22G	eis	22	0.640898	0.680041	0.942439	0.345968	3	1.97378	-0.691983	0.953456	FALSE	2.28427
AMI	ccsA_R42R	ccsA	42	0.63645	1.52	0.418716	0.675423	2	3.61566	-2.34276	0.956324	FALSE	2.28427
AMI	whiB6_D47G	whiB6	47	0.620778	0.825992	0.751555	0.452319	2	2.23972	-0.998166	0.953456	FALSE	2.28427
AMI	20.siteid	SITEID	15	0.615864	0.106696	5.77212	7.83e-09	0	0.824988	0.406739	2.33781e-07	FALSE	2.28427
AMI	whiB6_C53G	whiB6	53	0.613887	0.316861	1.9374	0.0526961	15	1.23493	-0.00715997	0.489488	TRUE	2.28427
AMI	rrs_c1021t	rrs	1021	0.610597	0.638138	0.956841	0.338647	4	1.86135	-0.640154	0.953456	FALSE	2.28427
AMI	aftB_g-22a	aftB	-22	0.559357	0.850027	0.658046	0.510509	2	2.22541	-1.1067	0.953456	FALSE	2.28427
AMI	whiB6_189_indel	whiB6	189	0.558967	0.828445	0.674719	0.499854	2	2.18272	-1.06478	0.953456	TRUE	2.28427
AMI	11.siteid	SITEID	13	0.547065	0.56859	0.962143	0.335978	0	1.6615	-0.567371	0.953456	FALSE	2.28427
AMI	aftB_L148L	aftB	148	0.544124	0.73117	0.744184	0.456765	2	1.97722	-0.888968	0.953456	TRUE	2.28427
AMI	ccsA_V301L	ccsA	301	0.544124	1.03286	0.526816	0.598321	1	2.56852	-1.48027	0.953456	FALSE	2.28427
AMI	fprA_G198E	fprA	198	0.544124	1.03286	0.526816	0.598321	1	2.56852	-1.48027	0.953456	FALSE	2.28427
AMI	fprA_D297D	fprA	297	0.544124	0.763703	0.712482	0.476166	2	2.04098	-0.952733	0.953456	FALSE	2.28427
AMI	whiB6_W60!	whiB6	60	0.540849	0.735056	0.735793	0.461857	3	1.98156	-0.899861	0.953456	TRUE	2.28427
AMI	whiB6_V79G	whiB6	79	0.536854	0.622941	0.861805	0.388795	4	1.75782	-0.684111	0.953456	TRUE	2.28427
AMI	aftB_L162L	aftB	162	0.534299	0.708855	0.753749	0.451	2	1.92365	-0.855057	0.953456	FALSE	2.28427
AMI	aftB_A265T	aftB	265	0.534299	0.584138	0.91468	0.36036	3	1.67921	-0.610611	0.953456	FALSE	2.28427
AMI	whiB6_R88W	whiB6	88	0.530233	0.550957	0.962386	0.335856	6	1.61011	-0.549642	0.953456	TRUE	2.28427
AMI	fprA_564_indel	fprA	564	0.513944	0.43116	1.192	0.23326	6	1.35902	-0.33113	0.953456	FALSE	2.28427
AMI	whiB6_156_indel	whiB6	156	0.498981	0.536242	0.930514	0.352105	6	1.55001	-0.552053	0.953456	TRUE	2.28427
AMI	whiB7_c-71g	whiB7	-71	0.476416	0.73634	0.647006	0.517628	3	1.91964	-0.96681	0.953456	FALSE	2.28427
AMI	whiB6_C53R	whiB6	53	0.469568	0.412536	1.13824	0.255018	9	1.27814	-0.339004	0.953456	TRUE	2.28427
AMI	fprA_A19G	fprA	19	0.464235	0.854864	0.543052	0.587094	3	2.13977	-1.2113	0.953456	FALSE	2.28427
AMI	rrs_a1449g	rrs	1449	0.458714	0.624788	0.734191	0.462832	4	1.6833	-0.765871	0.953456	FALSE	2.28427
AMI	eis_t-67a	eis	-67	0.450809	0.520235	0.866549	0.386189	6	1.47047	-0.568852	0.953456	FALSE	2.28427
AMI	ccsA_P61L	ccsA	61	0.438572	0.926149	0.473544	0.635825	2	2.25382	-1.37668	0.953456	TRUE	2.28427
AMI	eis_g-6t	eis	-6	0.430723	0.710606	0.606135	0.544425	3	1.82351	-0.962065	0.953456	TRUE	2.28427
AMI	whiB6_T44I	whiB6	44	0.408479	1.51169	0.270214	0.786996	2	3.37139	-2.55443	0.964327	TRUE	2.28427
AMI	ccsA_L187L	ccsA	187	0.407522	0.89209	0.456817	0.647803	2	2.15602	-1.34097	0.953456	TRUE	2.28427
AMI	eis_A243V	eis	243	0.39152	0.721861	0.542376	0.58756	3	1.80637	-1.02333	0.953456	FALSE	2.28427
AMI	whiB6_V29V	whiB6	29	0.384623	1.065	0.36115	0.717988	2	2.47202	-1.70277	0.964327	FALSE	2.28427
AMI	fprA_G105G	fprA	105	0.380619	0.520227	0.73164	0.464388	6	1.40026	-0.639026	0.953456	TRUE	2.28427
AMI	rrs_g72c	rrs	72	0.369464	0.731701	0.504938	0.613602	2	1.8036	-1.06467	0.953456	FALSE	2.28427
AMI	whiB6_Y3Y	whiB6	3	0.363435	0.421644	0.861947	0.388717	10	1.18986	-0.462988	0.953456	TRUE	2.28427
AMI	ccsA_V244M	ccsA	244	0.357384	0.824409	0.433503	0.66465	2	1.97323	-1.25846	0.956324	FALSE	2.28427
AMI	aftB_V293M	aftB	293	0.354682	0.347234	1.02145	0.307042	73	1.03526	-0.325897	0.953456	FALSE	2.28427
AMI	whiB6_C53W	whiB6	53	0.352997	0.806562	0.437656	0.661635	2	1.93386	-1.22786	0.956324	TRUE	2.28427
AMI	eis_R374R	eis	374	0.346029	0.703076	0.492165	0.622603	4	1.72406	-1.032	0.953456	FALSE	2.28427
AMI	ccsA_V27I	ccsA	27	0.345652	0.457572	0.755404	0.450007	15	1.24249	-0.551189	0.953456	FALSE	2.28427
AMI	fprA_S94A	fprA	94	0.34471	0.701877	0.491126	0.623337	3	1.72039	-1.03097	0.953456	FALSE	2.28427
AMI	eis_R106H	eis	106	0.337905	0.390555	0.865193	0.386933	15	1.10339	-0.427582	0.953456	FALSE	2.28427
AMI	aftB_V38V	aftB	38	0.328426	2.10472	0.156042	0.876	1	4.45368	-3.79683	0.973851	FALSE	2.28427
AMI	6.lineage	LINEAGE	5	0.326727	0.644401	0.507024	0.612138	0	1.58975	-0.936299	0.953456	FALSE	2.28427
AMI	whiB7_L42P	whiB7	42	0.316498	0.315598	1.00285	0.315932	18	0.93507	-0.302073	0.953456	FALSE	2.28427
AMI	whiB6_M1T	whiB6	1	0.307376	0.678886	0.452765	0.650718	6	1.63799	-1.02324	0.954386	TRUE	2.28427
AMI	whiB6_g-42t	whiB6	-42	0.295961	0.48013	0.616417	0.537619	18	1.23702	-0.645095	0.953456	FALSE	2.28427
AMI	eis_c-12t	eis	-12	0.289471	0.241706	1.19762	0.231066	76	0.763214	-0.184272	0.953456	TRUE	2.28427
AMI	whiB6_D37G	whiB6	37	0.282518	0.591397	0.477712	0.632855	5	1.44166	-0.87662	0.953456	FALSE	2.28427
AMI	whiB6_t-16c	whiB6	-16	0.275374	0.371154	0.741939	0.458124	11	1.00284	-0.452088	0.953456	TRUE	2.28427
AMI	rrs_c905a	rrs	905	0.270009	0.660335	0.408896	0.682616	4	1.56427	-1.02425	0.957401	TRUE	2.28427
AMI	rrs_g1027a	rrs	1027	0.268821	0.825427	0.325675	0.74467	2	1.88666	-1.34902	0.964327	FALSE	2.28427
AMI	aftB_K545K	aftB	545	0.267057	0.837367	0.318925	0.749783	2	1.9083	-1.37418	0.964327	TRUE	2.28427
AMI	whiB6_R59W	whiB6	59	0.267016	0.6095	0.43809	0.661321	3	1.46164	-0.927603	0.956324	TRUE	2.28427
AMI	whiB6_A25P:rrs_a1278g	whiB6	25	0.256461	1.29569	0.197934	0.843097	2	2.79602	-2.28309	0.970402	FALSE	2.28427
AMI	whiB6_P57L	whiB6	57	0.256121	0.442667	0.578585	0.562869	8	1.12375	-0.611507	0.953456	FALSE	2.28427
AMI	aftB_F177F	aftB	177	0.254044	0.801258	0.317056	0.751201	2	1.82451	-1.31642	0.964327	FALSE	2.28427
AMI	fprA_D98G	fprA	98	0.242638	0.179303	1.35323	0.175982	88	0.594072	-0.108795	0.953456	FALSE	2.28427
AMI	6.siteid	SITEID	10	0.240145	0.0758449	3.16626	0.0015441	0	0.388801	0.0914886	0.023905	FALSE	2.28427
AMI	whiB6_321_indel	whiB6	321	0.239573	0.778033	0.307922	0.758142	3	1.76452	-1.28537	0.964327	TRUE	2.28427
AMI	ccsA_R130R	ccsA	130	0.239227	0.690173	0.346619	0.728877	5	1.59197	-1.11351	0.964327	FALSE	2.28427
AMI	aftB_t-25c	aftB	-25	0.238349	0.474606	0.502204	0.615524	9	1.16858	-0.691878	0.953456	FALSE	2.28427
AMI	fprA_N133H	fprA	133	0.22236	0.769087	0.289122	0.772488	2	1.72977	-1.28505	0.964327	FALSE	2.28427
AMI	1.lineage	LINEAGE	1	0.208388	0.513439	0.405868	0.68484	0	1.21473	-0.797951	0.957401	FALSE	2.28427
AMI	fprA_G130S	fprA	130	0.207686	0.586569	0.354069	0.723287	4	1.35736	-0.941989	0.964327	FALSE	2.28427
AMI	eis_G123G	eis	123	0.203542	0.870114	0.233925	0.815043	2	1.90897	-1.50188	0.964327	TRUE	2.28427
AMI	aftB_V274A	aftB	274	0.198053	0.854345	0.231819	0.816679	2	1.87257	-1.47646	0.964327	FALSE	2.28427
AMI	8.siteid	SITEID	11	0.189188	0.0740293	2.55559	0.0106009	0	0.334286	0.0440908	0.134278	FALSE	2.28427
AMI	fprA_P188S	fprA	188	0.183346	0.4687	0.39118	0.695664	6	1.102	-0.735306	0.964327	TRUE	2.28427
AMI	whiB7_t-57g	whiB7	-57	0.179449	0.651428	0.27547	0.782956	4	1.45625	-1.09735	0.964327	TRUE	2.28427
AMI	aftB_N443N	aftB	443	0.160042	0.625216	0.255978	0.797968	3	1.38546	-1.06538	0.964327	FALSE	2.28427
AMI	aftB_D428Y	aftB	428	0.158637	0.676144	0.23462	0.814504	3	1.48388	-1.16661	0.964327	FALSE	2.28427
AMI	whiB6_R17G	whiB6	17	0.156933	0.408337	0.384321	0.70074	16	0.957274	-0.643409	0.964327	TRUE	2.28427
AMI	fprA_808_indel	fprA	808	0.14715	0.524434	0.280589	0.779026	10	1.17504	-0.880739	0.964327	FALSE	2.28427
AMI	whiB6_A77S	whiB6	77	0.142439	1.04851	0.135848	0.891941	1	2.19752	-1.91264	0.977914	FALSE	2.28427
AMI	aftB_S137A	aftB	137	0.140461	0.825264	0.170202	0.864851	2	1.75798	-1.47706	0.971795	FALSE	2.28427
AMI	fprA_L447R	fprA	447	0.140461	0.825264	0.170202	0.864851	2	1.75798	-1.47706	0.971795	FALSE	2.28427
AMI	aftB_V352G	aftB	352	0.134917	0.784714	0.171932	0.863491	2	1.67296	-1.40312	0.971795	TRUE	2.28427
AMI	rrs_a703c	rrs	703	0.132456	0.807821	0.163967	0.869757	2	1.71579	-1.45087	0.973851	TRUE	2.28427
AMI	eis_807_indel	eis	807	0.129875	0.195001	0.666024	0.505396	76	0.512077	-0.252326	0.953456	TRUE	2.28427
AMI	whiB6_R17R	whiB6	17	0.129708	0.259112	0.500588	0.616661	35	0.637567	-0.37815	0.953456	TRUE	2.28427
AMI	aftB_V338V	aftB	338	0.129142	0.825031	0.15653	0.875615	2	1.7462	-1.48792	0.973851	FALSE	2.28427
AMI	rrs_t-92g:eis_L386I	rrs	-92	0.12561	1.09291	0.114931	0.9085	2	2.26772	-2.0165	0.983816	FALSE	2.28427
AMI	whiB6_S115A	whiB6	115	0.12561	0.907776	0.138371	0.889948	3	1.90485	-1.65363	0.977914	FALSE	2.28427
AMI	whiB6_S97P	whiB6	97	0.124692	0.476955	0.261433	0.793758	11	1.05952	-0.81014	0.964327	TRUE	2.28427
AMI	aftB_I353T	aftB	353	0.107777	1.16482	0.0925271	0.926279	2	2.39082	-2.17527	0.990242	TRUE	2.28427
AMI	whiB7_g-56a	whiB7	-56	0.106145	1.48709	0.0713775	0.943097	1	3.02084	-2.80855	0.99147	FALSE	2.28427
AMI	aftB_V10V	aftB	10	0.0998612	0.623615	0.160133	0.872777	4	1.32215	-1.12242	0.973851	FALSE	2.28427
AMI	ns[cluster100])	DRUG	17	0.0972235	0.0130066	7.47496	7.73e-14	0	0.122716	0.0717306	3.59016e-12	FALSE	2.28427
AMI	whiB7_Q58R	whiB7	58	0.093451	1.66868	0.056003	0.955339	1	3.36406	-3.17716	0.99147	FALSE	2.28427
AMI	whiB7_K80Q:whiB7_H79Q	whiB7	80	0.0824617	0.986886	0.0835575	0.933408	17	2.01676	-1.85184	0.990266	FALSE	2.28427
AMI	rrs_a514c	rrs	514	0.0687894	0.112663	0.610579	0.541478	278	0.289608	-0.152029	0.953456	TRUE	2.28427
AMI	whiB6_A77V	whiB6	77	0.0503653	0.431318	0.116771	0.907042	34	0.895748	-0.795017	0.983816	TRUE	2.28427
AMI	whiB7_262_indel	whiB7	262	0.0447365	0.444449	0.100656	0.919823	7	0.915856	-0.826383	0.988835	TRUE	2.28427
AMI	rrs_c1153t	rrs	1153	0.0430117	0.506877	0.0848564	0.932376	6	1.03649	-0.950467	0.990266	TRUE	2.28427
AMI	rrs_t213g	rrs	213	0.0388913	0.683392	0.0569093	0.954617	3	1.37834	-1.30056	0.99147	FALSE	2.28427
AMI	whiB7_246_indel:whiB7_R81H	whiB7	246	0.0301437	0.976866	0.0308576	0.975383	17	1.9448	-1.88451	0.99929	TRUE	2.28427
AMI	ccsA_D221D	ccsA	221	0.0241143	0.325022	0.074193	0.940857	98	0.661156	-0.612928	0.99147	FALSE	2.28427
AMI	fprA_A71V	fprA	71	0.0108708	0.738279	0.0147245	0.988252	4	1.4579	-1.43616	1	FALSE	2.28427
AMI	whiB6_A63V	whiB6	63	1.51e-14	1.8395	8.2e-15	1	2	3.60543	-3.60543	1	FALSE	2.28427
AMI	aftB_V316V	aftB	316	1.95e-15	1.68663	1.16e-15	1	3	3.3058	-3.3058	1	FALSE	2.28427
AMI	whiB6_W16R	whiB6	16	5.01e-16	2.10828	2.38e-16	1	1	4.13222	-4.13222	1	FALSE	2.28427
AMI	aftB_A295T	aftB	295	-4.26e-14	1.8395	-2.32e-14	1	4	3.60543	-3.60543	1	FALSE	2.28427
AMI	whiB6_a-26c	whiB6	-26	-0.0071024	0.643401	-0.0110389	0.991192	4	1.25396	-1.26817	1	TRUE	2.28427
AMI	rrs_a514t	rrs	514	-0.0085563	0.54652	-0.0156559	0.987509	5	1.06262	-1.07973	1	TRUE	2.28427
AMI	eis_c-100t	eis	-100	-0.0123132	0.365341	-0.0337034	0.973114	18	0.703756	-0.728382	0.99929	TRUE	2.28427
AMI	eis_L235L	eis	235	-0.0187563	1.62561	-0.011538	0.990794	1	3.16744	-3.20495	1	FALSE	2.28427
AMI	whiB7_193_indel	whiB7	193	-0.0265476	1.03148	-0.0257374	0.979467	2	1.99516	-2.04825	1	FALSE	2.28427
AMI	fprA_A238V	fprA	238	-0.0274519	2.11279	-0.0129932	0.989633	1	4.11361	-4.16851	1	FALSE	2.28427
AMI	fprA_V194V	fprA	194	-0.0365269	0.889626	-0.0410587	0.967249	4	1.70714	-1.78019	0.995838	FALSE	2.28427
AMI	rrs_-26_indel	rrs	-26	-0.0379	0.567693	-0.0667613	0.946772	6	1.07478	-1.15058	0.99147	FALSE	2.28427
AMI	fprA_E311E	fprA	311	-0.0379356	0.51421	-0.0737745	0.94119	12	0.969916	-1.04579	0.99147	FALSE	2.28427
AMI	eis_T231I	eis	231	-0.0385516	0.736652	-0.0523335	0.958263	3	1.40529	-1.48239	0.99147	FALSE	2.28427
AMI	whiB6_A77A	whiB6	77	-0.0385516	0.736652	-0.0523335	0.958263	3	1.40529	-1.48239	0.99147	FALSE	2.28427
AMI	whiB6_M21T	whiB6	21	-0.0385945	0.601015	-0.0642155	0.948799	8	1.1394	-1.21658	0.99147	TRUE	2.28427
AMI	aftB_I582I	aftB	582	-0.0461089	0.474554	-0.0971626	0.922597	8	0.884017	-0.976235	0.988835	FALSE	2.28427
AMI	10.siteid	SITEID	12	-0.050711	0.0802183	-0.632163	0.52728	0	0.106517	-0.207939	0.953456	FALSE	2.28427
AMI	whiB6_232_indel	whiB6	232	-0.0545038	0.637186	-0.0855383	0.931833	4	1.19438	-1.30339	0.990266	TRUE	2.28427
AMI	fprA_K372K	fprA	372	-0.0822354	1.68074	-0.0489282	0.960977	4	3.21201	-3.37648	0.991823	FALSE	2.28427
AMI	whiB6_R96R	whiB6	96	-0.0983187	0.695939	-0.141275	0.887653	5	1.26572	-1.46236	0.977914	FALSE	2.28427
AMI	ccsA_A124A	ccsA	124	-0.101732	1.49609	-0.0679985	0.945787	1	2.83061	-3.03407	0.99147	FALSE	2.28427
AMI	eis_V163I	eis	163	-0.102362	0.11447	-0.894227	0.371201	308	0.121999	-0.326723	0.953456	TRUE	2.28427
AMI	ccsA_R131C	ccsA	131	-0.103072	1.05687	-0.0975257	0.922309	2	1.96839	-2.17453	0.988835	FALSE	2.28427
AMI	rrs_g891a	rrs	891	-0.103072	1.05687	-0.0975257	0.922309	2	1.96839	-2.17453	0.988835	FALSE	2.28427
AMI	rrs_t17g	rrs	17	-0.114414	0.535521	-0.21365	0.83082	5	0.935206	-1.16403	0.970402	TRUE	2.28427
AMI	whiB6_E8D	whiB6	8	-0.120483	0.514324	-0.234256	0.814787	5	0.887592	-1.12856	0.964327	FALSE	2.28427
AMI	whiB7_P11S	whiB7	11	-0.131614	0.675299	-0.194897	0.845473	5	1.19197	-1.4552	0.970402	FALSE	2.28427
AMI	aftB_G549S	aftB	549	-0.132192	1.03501	-0.12772	0.89837	1	1.89642	-2.16081	0.977914	FALSE	2.28427
AMI	rrs_c414t	rrs	414	-0.132192	1.03501	-0.12772	0.89837	1	1.89642	-2.16081	0.977914	FALSE	2.28427
AMI	fprA_L455R	fprA	455	-0.134776	0.891656	-0.151153	0.879855	3	1.61287	-1.88242	0.975542	FALSE	2.28427
AMI	whiB6_77_indel	whiB6	77	-0.138292	1.07262	-0.128929	0.897414	2	1.96404	-2.24062	0.977914	TRUE	2.28427
AMI	whiB6_A72G	whiB6	72	-0.14959	0.446036	-0.335376	0.737341	12	0.724641	-1.02382	0.964327	FALSE	2.28427
AMI	whiB7_V3A	whiB7	3	-0.150394	0.824759	-0.182349	0.855309	2	1.46613	-1.76692	0.971795	FALSE	2.28427
AMI	whiB6_L95V	whiB6	95	-0.150565	0.782209	-0.192487	0.847361	2	1.38257	-1.6837	0.970402	FALSE	2.28427
AMI	fprA_Q316R	fprA	316	-0.153434	0.796983	-0.192519	0.847336	4	1.40865	-1.71552	0.970402	FALSE	2.28427
AMI	aftB_H585Y	aftB	585	-0.155645	0.773652	-0.201183	0.840556	2	1.36071	-1.672	0.970402	FALSE	2.28427
AMI	aftB_E563G:aftB_Q561R	aftB	563	-0.155685	0.352591	-0.441544	0.658819	11	0.535394	-0.846763	0.956324	FALSE	2.28427
AMI	eis_Y126Y	eis	126	-0.157845	0.499293	-0.316138	0.751898	11	0.820768	-1.13646	0.964327	FALSE	2.28427
AMI	aftB_P618P	aftB	618	-0.158309	0.525472	-0.30127	0.763208	6	0.871616	-1.18823	0.964327	FALSE	2.28427
AMI	aftB_A28A	aftB	28	-0.162878	0.391271	-0.41628	0.677205	17	0.604013	-0.92977	0.956324	FALSE	2.28427
AMI	rrs_a906g	rrs	906	-0.173003	0.250878	-0.689588	0.490454	29	0.318719	-0.664724	0.953456	TRUE	2.28427
AMI	aftB_A449T	aftB	449	-0.179581	0.80513	-0.223045	0.8235	4	1.39847	-1.75764	0.969642	FALSE	2.28427
AMI	ccsA_V143F	ccsA	143	-0.183132	0.784933	-0.233308	0.815522	3	1.35534	-1.7216	0.964327	FALSE	2.28427
AMI	whiB7_a-24g	whiB7	-24	-0.192627	0.754713	-0.255232	0.798544	3	1.28661	-1.67187	0.964327	FALSE	2.28427
AMI	rrs_c1443g	rrs	1443	-0.203294	0.621309	-0.327203	0.743514	7	1.01447	-1.42106	0.964327	FALSE	2.28427
AMI	whiB6_a-26g	whiB6	-26	-0.209758	1.05467	-0.198884	0.842353	2	1.8574	-2.27692	0.970402	TRUE	2.28427
AMI	whiB6_214_indel	whiB6	214	-0.212029	1.06066	-0.199902	0.841557	2	1.86687	-2.29092	0.970402	FALSE	2.28427
AMI	whiB6_g-24a	whiB6	-24	-0.22312	1.06514	-0.209476	0.834077	2	1.86455	-2.31079	0.970402	TRUE	2.28427
AMI	fprA_A238T	fprA	238	-0.233428	0.726636	-0.321245	0.748025	5	1.19078	-1.65764	0.964327	FALSE	2.28427
AMI	aftB_A374A	aftB	374	-0.236119	0.595248	-0.396674	0.691608	7	0.930567	-1.40281	0.963641	FALSE	2.28427
AMI	whiB6_G71G:whiB6_A6E	whiB6	71	-0.236942	0.697859	-0.339526	0.734213	3	1.13086	-1.60475	0.964327	FALSE	2.28427
AMI	aftB_N40D	aftB	40	-0.253373	0.504675	-0.502052	0.615631	10	0.73579	-1.24254	0.953456	FALSE	2.28427
AMI	whiB6_P38A	whiB6	38	-0.259275	0.545022	-0.475715	0.634278	8	0.808968	-1.32752	0.953456	FALSE	2.28427
AMI	whiB6_T51P	whiB6	51	-0.259579	0.341558	-0.759984	0.447264	117	0.409875	-0.929032	0.953456	FALSE	2.28427
AMI	fprA_V141I:aftB_I327V	fprA	141	-0.262836	0.474528	-0.553889	0.579655	9	0.66724	-1.19291	0.953456	FALSE	2.28427
AMI	aftB_D248G	aftB	248	-0.266082	1.05647	-0.25186	0.801149	2	1.8046	-2.33676	0.964327	FALSE	2.28427
AMI	aftB_L500L	aftB	500	-0.266082	1.07994	-0.246385	0.805384	2	1.85061	-2.38277	0.964327	FALSE	2.28427
AMI	aftB_P625P	aftB	625	-0.266082	1.07994	-0.246385	0.805384	2	1.85061	-2.38277	0.964327	FALSE	2.28427
AMI	ccsA_V26V	ccsA	26	-0.266082	1.49242	-0.178288	0.858497	1	2.65907	-3.19123	0.971795	FALSE	2.28427
AMI	ccsA_R217G	ccsA	217	-0.266082	1.07994	-0.246385	0.805384	2	1.85061	-2.38277	0.964327	FALSE	2.28427
AMI	eis_c-69t	eis	-69	-0.266082	1.49242	-0.178288	0.858497	1	2.65907	-3.19123	0.971795	FALSE	2.28427
AMI	fprA_E95E	fprA	95	-0.266082	1.07994	-0.246385	0.805384	2	1.85061	-2.38277	0.964327	FALSE	2.28427
AMI	fprA_N349T	fprA	349	-0.266082	1.05647	-0.25186	0.801149	3	1.8046	-2.33676	0.964327	FALSE	2.28427
AMI	fprA_S420P	fprA	420	-0.266082	1.05647	-0.25186	0.801149	2	1.8046	-2.33676	0.964327	FALSE	2.28427
AMI	rrs_t1164a	rrs	1164	-0.266082	1.05647	-0.25186	0.801149	2	1.8046	-2.33676	0.964327	FALSE	2.28427
AMI	rrs_g1323t	rrs	1323	-0.266082	1.49242	-0.178288	0.858497	2	2.65907	-3.19123	0.971795	TRUE	2.28427
AMI	whiB6_N18N	whiB6	18	-0.266082	0.901395	-0.295189	0.76785	3	1.50065	-2.03282	0.964327	FALSE	2.28427
AMI	whiB6_R40H	whiB6	40	-0.266082	0.876175	-0.303686	0.761367	3	1.45122	-1.98338	0.964327	FALSE	2.28427
AMI	whiB6_R110W	whiB6	110	-0.266082	0.901395	-0.295189	0.76785	3	1.50065	-2.03282	0.964327	FALSE	2.28427
AMI	5.siteid	SITEID	9	-0.267633	0.0762127	-3.51166	0.0004453	0	-0.118256	-0.41701	0.00930677	FALSE	2.28427
AMI	whiB6_D46G	whiB6	46	-0.269934	0.814016	-0.331608	0.740186	2	1.32554	-1.86541	0.964327	TRUE	2.28427
AMI	aftB_A127A	aftB	127	-0.272002	0.302021	-0.900608	0.367797	47	0.319958	-0.863962	0.953456	FALSE	2.28427
AMI	whiB6_a-54g	whiB6	-54	-0.273563	0.345468	-0.791864	0.42844	23	0.403553	-0.95068	0.953456	FALSE	2.28427
AMI	fprA_G232S	fprA	232	-0.281489	0.547671	-0.513974	0.60727	8	0.791947	-1.35492	0.953456	FALSE	2.28427
AMI	whiB6_c-91t	whiB6	-91	-0.282869	2.14271	-0.132015	0.894973	1	3.91685	-4.48259	0.977914	FALSE	2.28427
AMI	aftB_A417D	aftB	417	-0.293534	0.907632	-0.323406	0.746388	3	1.48542	-2.07249	0.964327	FALSE	2.28427
AMI	rrs_t23c	rrs	23	-0.30587	0.789454	-0.387445	0.698427	2	1.24146	-1.8532	0.964327	FALSE	2.28427
AMI	ccsA_A229S	ccsA	229	-0.306961	0.87585	-0.350472	0.725984	3	1.4097	-2.02363	0.964327	FALSE	2.28427
AMI	whiB6_132_indel	whiB6	132	-0.314961	0.826066	-0.381278	0.702997	2	1.30413	-1.93405	0.964327	TRUE	2.28427
AMI	whiB7_A60A	whiB7	60	-0.316444	1.49268	-0.211997	0.832109	1	2.60921	-3.2421	0.970402	FALSE	2.28427
AMI	rrs_g1148a	rrs	1148	-0.326623	1.19053	-0.27435	0.783815	3	2.00682	-2.66007	0.964327	FALSE	2.28427
AMI	whiB7_a-89g	whiB7	-89	-0.348412	0.677006	-0.514636	0.606807	6	0.97852	-1.67534	0.953456	FALSE	2.28427
AMI	rrs_c492t	rrs	492	-0.35727	0.104736	-3.41114	0.0006469	361	-0.151987	-0.562553	0.0122911	TRUE	2.28427
AMI	whiB6_A63E	whiB6	63	-0.367168	0.863498	-0.425211	0.670683	3	1.32529	-2.05962	0.956324	FALSE	2.28427
AMI	whiB6_A66V	whiB6	66	-0.367168	1.4863	-0.247035	0.804881	1	2.54598	-3.28032	0.964327	FALSE	2.28427
AMI	2.lineage	LINEAGE	2	-0.368259	0.0576605	-6.38667	1.7e-10	0	-0.255244	-0.481273	7.106e-09	FALSE	2.28427
AMI	whiB6_A77E	whiB6	77	-0.372413	1.08439	-0.34343	0.731275	2	1.753	-2.49782	0.964327	FALSE	2.28427
AMI	whiB6_Q94E	whiB6	94	-0.37967	0.171604	-2.21248	0.0269336	194	-0.0433264	-0.716014	0.281456	TRUE	2.28427
AMI	rrs_g-65a	rrs	-65	-0.380825	0.777803	-0.489615	0.624406	4	1.14367	-1.90532	0.953456	TRUE	2.28427
AMI	rrs_c1141t	rrs	1141	-0.386349	0.631883	-0.611425	0.540918	8	0.852141	-1.62484	0.953456	TRUE	2.28427
AMI	whiB6_Y27!	whiB6	27	-0.386985	0.74527	-0.519255	0.603583	7	1.07374	-1.84771	0.953456	TRUE	2.28427
AMI	whiB6_D46E	whiB6	46	-0.40165	0.817788	-0.491142	0.623326	2	1.20121	-2.00451	0.953456	TRUE	2.28427
AMI	aftB_S469L	aftB	469	-0.407649	0.571506	-0.713289	0.475667	7	0.712502	-1.5278	0.953456	FALSE	2.28427
AMI	whiB6_315_indel	whiB6	315	-0.408012	0.734785	-0.55528	0.578703	3	1.03217	-1.84819	0.953456	TRUE	2.28427
AMI	whiB6_R54G	whiB6	54	-0.413272	0.899975	-0.459204	0.646088	3	1.35068	-2.17722	0.953456	FALSE	2.28427
AMI	3.lineage	LINEAGE	3	-0.418621	0.0693496	-6.03639	1.58e-09	0	-0.282696	-0.554547	5.50367e-08	FALSE	2.28427
AMI	whiB6_R107C	whiB6	107	-0.419143	0.311241	-1.34668	0.178083	108	0.19089	-1.02918	0.953456	TRUE	2.28427
AMI	aftB_G103C	aftB	103	-0.421308	1.29248	-0.325968	0.744448	2	2.11196	-2.95457	0.964327	FALSE	2.28427
AMI	whiB6_236_indel	whiB6	236	-0.425593	0.38798	-1.09695	0.272664	12	0.334847	-1.18603	0.953456	TRUE	2.28427
AMI	eis_L356L	eis	356	-0.431921	0.566291	-0.762719	0.445631	7	0.678009	-1.54185	0.953456	FALSE	2.28427
AMI	whiB6_E8K	whiB6	8	-0.459407	0.95854	-0.479278	0.631741	6	1.41933	-2.33815	0.953456	FALSE	2.28427
AMI	whiB6_L98R	whiB6	98	-0.466648	1.68252	-0.277351	0.781511	1	2.83109	-3.76438	0.964327	FALSE	2.28427
AMI	whiB6_152_indel	whiB6	152	-0.467832	0.717447	-0.652079	0.51435	3	0.938364	-1.87403	0.953456	TRUE	2.28427
AMI	whiB6_223_indel	whiB6	223	-0.474166	0.844204	-0.561672	0.57434	3	1.18047	-2.12881	0.953456	TRUE	2.28427
AMI	fprA_Q337Q	fprA	337	-0.474748	1.51395	-0.313581	0.753839	4	2.4926	-3.4421	0.964327	TRUE	2.28427
AMI	rrs_c517t	rrs	517	-0.483237	0.195481	-2.47204	0.0134345	82	-0.100094	-0.86638	0.156503	TRUE	2.28427
AMI	whiB6_F90S	whiB6	90	-0.51134	1.09782	-0.465779	0.641374	2	1.64038	-2.66306	0.953456	TRUE	2.28427
AMI	aftB_G247G	aftB	247	-0.516383	0.633941	-0.814561	0.415324	6	0.72614	-1.75891	0.953456	FALSE	2.28427
AMI	aftB_T282M	aftB	282	-0.521693	1.4918	-0.349706	0.726559	1	2.40224	-3.44563	0.964327	FALSE	2.28427
AMI	aftB_R303Q	aftB	303	-0.521693	1.07909	-0.483459	0.62877	2	1.59331	-2.6367	0.953456	FALSE	2.28427
AMI	aftB_L347L	aftB	347	-0.521693	1.4918	-0.349706	0.726559	1	2.40224	-3.44563	0.964327	FALSE	2.28427
AMI	ccsA_T117T:aftB_L151F	ccsA	117	-0.521693	1.4918	-0.349706	0.726559	1	2.40224	-3.44563	0.964327	FALSE	2.28427
AMI	fprA_M38T	fprA	38	-0.521693	1.07909	-0.483459	0.62877	2	1.59331	-2.6367	0.953456	FALSE	2.28427
AMI	fprA_E400G	fprA	400	-0.521693	1.07909	-0.483459	0.62877	2	1.59331	-2.6367	0.953456	FALSE	2.28427
AMI	whiB6_g-93c	whiB6	-93	-0.521693	0.862477	-0.604877	0.545261	3	1.16876	-2.21215	0.953456	FALSE	2.28427
AMI	whiB7_R50L	whiB7	50	-0.521693	1.4918	-0.349706	0.726559	1	2.40224	-3.44563	0.964327	FALSE	2.28427
AMI	rrs_t1011c	rrs	1011	-0.524413	0.769154	-0.681805	0.495362	3	0.983129	-2.03196	0.953456	FALSE	2.28427
AMI	rrs_g142a	rrs	142	-0.526113	0.828297	-0.635175	0.525314	2	1.09735	-2.14957	0.953456	FALSE	2.28427
AMI	rrs_-42_indel	rrs	-42	-0.526987	0.882762	-0.596976	0.550524	3	1.20323	-2.2572	0.953456	FALSE	2.28427
AMI	whiB7_c-53t	whiB7	-53	-0.529647	0.499871	-1.05957	0.289341	10	0.4501	-1.50939	0.953456	FALSE	2.28427
AMI	4.siteid	SITEID	8	-0.531028	0.0841782	-6.30838	2.82e-10	0	-0.366039	-0.696017	1.0716e-08	FALSE	2.28427
AMI	whiB7_192_indel:whiB6_R54Q	whiB7	192	-0.539002	0.277884	-1.93966	0.0524205	42	0.00565093	-1.08366	0.489488	TRUE	2.28427
LEV	gyrB_S661T:gyrB_I271M	gyrB	661	-0.298644	0.109149	-2.7361	0.0062172	109	-0.0847109	-0.512576	0.0425148	FALSE	1.5799
AMI	rrs_a908c	rrs	908	-0.548234	0.511714	-1.07137	0.284004	9	0.454726	-1.55119	0.953456	TRUE	2.28427
AMI	eis_T398N	eis	398	-0.555352	1.49214	-0.372185	0.709755	1	2.36924	-3.47995	0.964327	FALSE	2.28427
AMI	fprA_P364S:ccsA_P144S	fprA	364	-0.565167	1.04808	-0.53924	0.589721	2	1.48907	-2.6194	0.953456	FALSE	2.28427
AMI	rrs_g878a	rrs	878	-0.566179	0.426055	-1.32889	0.183886	10	0.268889	-1.40125	0.953456	TRUE	2.28427
AMI	whiB6_C34Y	whiB6	34	-0.579839	0.727473	-0.797059	0.425417	5	0.846008	-2.00569	0.953456	FALSE	2.28427
AMI	ccsA_L47L	ccsA	47	-0.582971	0.115156	-5.06246	4.14e-07	211	-0.357266	-0.808676	1.08158e-05	TRUE	2.28427
AMI	fprA_A106T:aftB_T11M	fprA	106	-0.590828	1.08254	-0.545779	0.585218	2	1.53095	-2.71261	0.953456	FALSE	2.28427
AMI	fprA_E117G	fprA	117	-0.590828	0.904504	-0.653207	0.513623	3	1.182	-2.36366	0.953456	FALSE	2.28427
AMI	whiB6_82_indel	whiB6	82	-0.591241	0.663309	-0.891351	0.372741	5	0.708844	-1.89133	0.953456	TRUE	2.28427
AMI	ccsA_T232T	ccsA	232	-0.591293	1.03998	-0.568563	0.569652	2	1.44706	-2.62965	0.953456	TRUE	2.28427
AMI	aftB_P423P	aftB	423	-0.591426	1.1241	-0.526135	0.598795	2	1.6118	-2.79466	0.953456	FALSE	2.28427
AMI	fprA_N385D:fprA_V197V	fprA	385	-0.599558	0.521815	-1.14899	0.250562	541	0.423199	-1.62231	0.953456	TRUE	2.28427
AMI	whiB7_C20C	whiB7	20	-0.604006	1.08109	-0.5587	0.576367	2	1.51493	-2.72295	0.953456	FALSE	2.28427
AMI	whiB6_199_indel	whiB6	199	-0.616539	1.04902	-0.587731	0.556713	2	1.43953	-2.67261	0.953456	TRUE	2.28427
AMI	whiB6_Y3C	whiB6	3	-0.624656	1.06232	-0.58801	0.556525	2	1.45749	-2.70681	0.953456	FALSE	2.28427
AMI	whiB6_g-10a	whiB6	-10	-0.627583	1.48814	-0.421722	0.673228	1	2.28918	-3.54434	0.956324	FALSE	2.28427
AMI	aftB_A115V	aftB	115	-0.630327	0.899356	-0.700865	0.483387	3	1.13241	-2.39306	0.953456	FALSE	2.28427
AMI	aftB_L220L	aftB	220	-0.630505	1.05968	-0.594993	0.551848	2	1.44648	-2.70749	0.953456	FALSE	2.28427
AMI	aftB_R114R	aftB	114	-0.63276	0.675387	-0.936885	0.348818	5	0.690999	-1.95652	0.953456	FALSE	2.28427
AMI	aftB_D398D	aftB	398	-0.63276	1.49469	-0.42334	0.672047	1	2.29682	-3.56234	0.956324	FALSE	2.28427
AMI	eis_A86V	eis	86	-0.63276	0.86745	-0.729448	0.465728	3	1.06744	-2.33296	0.953456	FALSE	2.28427
AMI	eis_G188A	eis	188	-0.63276	0.880017	-0.719031	0.472122	3	1.09207	-2.35759	0.953456	FALSE	2.28427
AMI	fprA_P115L	fprA	115	-0.63276	1.08306	-0.584231	0.559065	6	1.49005	-2.75557	0.953456	FALSE	2.28427
AMI	whiB6_c-44t	whiB6	-44	-0.63276	1.49469	-0.42334	0.672047	1	2.29682	-3.56234	0.956324	FALSE	2.28427
AMI	ccsA_R131R	ccsA	131	-0.634079	0.776097	-0.81701	0.413922	4	0.887071	-2.15523	0.953456	TRUE	2.28427
AMI	fprA_A19A	fprA	19	-0.634079	1.05886	-0.598831	0.549286	2	1.44129	-2.70945	0.953456	FALSE	2.28427
AMI	fprA_D404D	fprA	404	-0.634079	0.9042	-0.70126	0.483141	3	1.13815	-2.40631	0.953456	FALSE	2.28427
AMI	aftB_V544M	aftB	544	-0.641391	0.36713	-1.74704	0.0806305	12	0.0781842	-1.36097	0.641815	FALSE	2.28427
AMI	whiB6_P38L	whiB6	38	-0.642796	0.364818	-1.76196	0.0780754	39	0.0722471	-1.35784	0.641815	TRUE	2.28427
AMI	whiB6_307_indel	whiB6	307	-0.645768	0.555607	-1.16227	0.245124	7	0.443222	-1.73476	0.953456	TRUE	2.28427
AMI	eis_E401D	eis	401	-0.651668	1.03231	-0.631272	0.527863	2	1.37166	-2.675	0.953456	FALSE	2.28427
AMI	whiB6_279_indel	whiB6	279	-0.653642	1.04145	-0.627625	0.53025	2	1.3876	-2.69489	0.953456	FALSE	2.28427
AMI	eis_P220P	eis	220	-0.654431	0.603303	-1.08475	0.278034	7	0.528043	-1.8369	0.953456	FALSE	2.28427
AMI	fprA_L173S	fprA	173	-0.663953	0.679741	-0.976775	0.328681	5	0.668338	-1.99625	0.953456	FALSE	2.28427
AMI	aftB_A304A	aftB	304	-0.684703	1.07973	-0.63414	0.525989	2	1.43158	-2.80098	0.953456	FALSE	2.28427
AMI	eis_H270Q	eis	270	-0.684703	0.875917	-0.781698	0.434392	3	1.03209	-2.4015	0.953456	FALSE	2.28427
AMI	eis_Q272!	eis	272	-0.684703	1.49227	-0.458832	0.646355	1	2.24015	-3.60956	0.953456	FALSE	2.28427
AMI	rrs_t1327g	rrs	1327	-0.684703	1.49227	-0.458832	0.646355	1	2.24015	-3.60956	0.953456	FALSE	2.28427
AMI	whiB6_L52Q	whiB6	52	-0.684703	1.49227	-0.458832	0.646355	1	2.24015	-3.60956	0.953456	FALSE	2.28427
AMI	3.siteid	SITEID	7	-0.694038	0.0763333	-9.09221	0	0	-0.544425	-0.843651	0	FALSE	2.28427
AMI	fprA_E117K	fprA	117	-0.703214	1.0948	-0.642324	0.520663	2	1.44259	-2.84901	0.953456	TRUE	2.28427
AMI	rrs_t23g	rrs	23	-0.710419	1.07604	-0.660216	0.509115	2	1.39862	-2.81946	0.953456	TRUE	2.28427
AMI	whiB6_c-49t	whiB6	-49	-0.715347	1.09357	-0.654141	0.513021	2	1.42804	-2.85874	0.953456	TRUE	2.28427
AMI	eis_P193S	eis	193	-0.721364	0.862742	-0.83613	0.403082	3	0.96961	-2.41234	0.953456	TRUE	2.28427
AMI	whiB6_t-79c:whiB6_a-81t	whiB6	-79	-0.729178	1.20139	-0.606946	0.543887	4	1.62554	-3.0839	0.953456	TRUE	2.28427
AMI	eis_T4P	eis	4	-0.744426	0.793166	-0.93855	0.347962	2	0.81018	-2.29903	0.953456	FALSE	2.28427
AMI	aftB_P292P	aftB	292	-0.750178	1.48872	-0.503908	0.614326	1	2.16771	-3.66807	0.953456	FALSE	2.28427
AMI	aftB_H420H	aftB	420	-0.757401	0.819789	-0.923897	0.35554	4	0.849385	-2.36419	0.953456	FALSE	2.28427
AMI	whiB6_V79A	whiB6	79	-0.759816	0.899044	-0.845138	0.398034	3	1.00231	-2.52194	0.953456	FALSE	2.28427
AMI	rrs_642_indel	rrs	642	-0.763977	0.710988	-1.07453	0.282585	3	0.629558	-2.15751	0.953456	FALSE	2.28427
AMI	aftB_S182S	aftB	182	-0.769463	1.07358	-0.716728	0.473542	2	1.33475	-2.87367	0.953456	FALSE	2.28427
AMI	fprA_R291H	fprA	291	-0.771173	1.82718	-0.422056	0.672984	1	2.8101	-4.35245	0.956324	FALSE	2.28427
AMI	ccsA_F237S	ccsA	237	-0.78215	1.07211	-0.729543	0.46567	2	1.31919	-2.88349	0.953456	FALSE	2.28427
AMI	whiB6_R110R	whiB6	110	-0.807859	1.07731	-0.749884	0.453325	2	1.30367	-2.91939	0.953456	FALSE	2.28427
AMI	aftB_A176A	aftB	176	-0.814124	1.10212	-0.738688	0.460096	2	1.34603	-2.97428	0.953456	FALSE	2.28427
AMI	aftB_D555D	aftB	555	-0.821147	0.944935	-0.868999	0.384848	3	1.03093	-2.67322	0.953456	FALSE	2.28427
AMI	aftB_L266P	aftB	266	-0.838797	0.837782	-1.00121	0.316725	3	0.803255	-2.48085	0.953456	TRUE	2.28427
AMI	eis_P14P	eis	14	-0.846671	1.01901	-0.830873	0.406045	2	1.1506	-2.84394	0.953456	FALSE	2.28427
AMI	eis_t-66g	eis	-66	-0.847472	1.05551	-0.802904	0.42203	2	1.22133	-2.91627	0.953456	FALSE	2.28427
AMI	fprA_E40E	fprA	40	-0.847472	0.79596	-1.06472	0.287004	4	0.71261	-2.40755	0.953456	FALSE	2.28427
AMI	rrs_-81_indel	rrs	-81	-0.847472	1.05551	-0.802904	0.42203	2	1.22133	-2.91627	0.953456	FALSE	2.28427
AMI	rrs_255_indel	rrs	255	-0.847472	1.49175	-0.568107	0.569962	2	2.07635	-3.7713	0.953456	FALSE	2.28427
AMI	whiB6_P38S	whiB6	38	-0.847472	1.49175	-0.568107	0.569962	1	2.07635	-3.7713	0.953456	FALSE	2.28427
AMI	whiB6_K50K	whiB6	50	-0.847472	1.07901	-0.78542	0.432208	2	1.26738	-2.96232	0.953456	FALSE	2.28427
AMI	ccsA_D226N	ccsA	226	-0.852046	1.14931	-0.741357	0.458477	6	1.40059	-3.10469	0.953456	FALSE	2.28427
AMI	aftB_M99I	aftB	99	-0.857504	1.09389	-0.783901	0.433098	2	1.28653	-3.00153	0.953456	TRUE	2.28427
AMI	rrs_t-4g:ccsA_R257C	rrs	-4	-0.881628	0.463696	-1.90131	0.0572619	14	0.0272159	-1.79047	0.509265	TRUE	2.28427
AMI	whiB6_T42M	whiB6	42	-0.88466	1.04452	-0.846953	0.397021	2	1.1626	-2.93192	0.953456	TRUE	2.28427
AMI	aftB_L172F	aftB	172	-0.896538	0.615768	-1.45597	0.145402	7	0.310367	-2.10344	0.953456	TRUE	2.28427
AMI	eis_T70T	eis	70	-0.930588	1.14691	-0.811386	0.417144	2	1.31736	-3.17854	0.953456	FALSE	2.28427
AMI	aftB_A573A	aftB	573	-0.948098	1.4914	-0.63571	0.524965	1	1.97505	-3.87124	0.953456	FALSE	2.28427
AMI	ccsA_T56A	ccsA	56	-0.948098	1.07853	-0.879068	0.379364	2	1.16581	-3.06201	0.953456	FALSE	2.28427
AMI	eis_t-44c	eis	-44	-0.948098	1.07853	-0.879068	0.379364	2	1.16581	-3.06201	0.953456	FALSE	2.28427
AMI	whiB6_E28Q	whiB6	28	-0.953835	0.753689	-1.26555	0.205673	4	0.523396	-2.43107	0.953456	TRUE	2.28427
AMI	eis_V301I	eis	301	-0.969037	0.868606	-1.11562	0.264584	3	0.733431	-2.67151	0.953456	FALSE	2.28427
AMI	eis_E348D	eis	348	-0.978789	1.64473	-0.595107	0.551772	1	2.24488	-4.20246	0.953456	FALSE	2.28427
AMI	whiB6_G85S	whiB6	85	-0.997011	1.49148	-0.668473	0.503832	5	1.92628	-3.9203	0.953456	TRUE	2.28427
AMI	ccsA_A189T	ccsA	189	-0.997822	1.49057	-0.669425	0.503225	7	1.92369	-3.91933	0.953456	FALSE	2.28427
AMI	whiB6_D46A	whiB6	46	-1.02268	1.49152	-0.685666	0.492924	3	1.90069	-3.94605	0.953456	TRUE	2.28427
AMI	fprA_S299R	fprA	299	-1.02858	0.597311	-1.72201	0.0850671	7	0.142152	-2.19931	0.658482	FALSE	2.28427
AMI	aftB_Y106Y	aftB	106	-1.03666	1.0793	-0.96049	0.336809	2	1.07878	-3.1521	0.953456	FALSE	2.28427
AMI	ccsA_N296S	ccsA	296	-1.03666	1.49196	-0.69483	0.487162	1	1.88759	-3.96091	0.953456	FALSE	2.28427
AMI	whiB7_V6V	whiB7	6	-1.03666	0.796365	-1.30174	0.193005	4	0.524214	-2.59753	0.953456	FALSE	2.28427
AMI	aftB_L98F	aftB	98	-1.03725	1.49214	-0.695145	0.486964	1	1.88734	-3.96185	0.953456	FALSE	2.28427
AMI	aftB_L278L	aftB	278	-1.03725	1.49214	-0.695145	0.486964	1	1.88734	-3.96185	0.953456	FALSE	2.28427
AMI	ccsA_T3M	ccsA	3	-1.03725	1.07955	-0.960821	0.336642	2	1.07866	-3.15317	0.953456	FALSE	2.28427
AMI	rrs_c340t	rrs	340	-1.03725	1.49214	-0.695145	0.486964	1	1.88734	-3.96185	0.953456	FALSE	2.28427
AMI	whiB6_R17S	whiB6	17	-1.03725	1.05607	-0.982187	0.326008	2	1.03264	-3.10714	0.953456	FALSE	2.28427
AMI	whiB6_R101C	whiB6	101	-1.03725	1.05607	-0.982187	0.326008	2	1.03264	-3.10714	0.953456	FALSE	2.28427
AMI	whiB6_R64L	whiB6	64	-1.06442	1.48665	-0.715987	0.473999	3	1.84941	-3.97825	0.953456	TRUE	2.28427
AMI	rrs_g655c	rrs	655	-1.06471	1.06265	-1.00193	0.316377	2	1.01809	-3.14751	0.953456	FALSE	2.28427
AMI	aftB_M254A	aftB	254	-1.07781	1.51353	-0.712116	0.476393	1	1.88871	-4.04432	0.953456	FALSE	2.28427
AMI	aftB_R303R	aftB	303	-1.08762	1.49231	-0.728815	0.466115	1	1.83731	-4.01254	0.953456	FALSE	2.28427
AMI	whiB7_a-80c	whiB7	-80	-1.09106	0.600628	-1.81653	0.0692897	6	0.0861749	-2.26829	0.603398	TRUE	2.28427
AMI	fprA_A134A	fprA	134	-1.10545	1.08472	-1.01911	0.30815	2	1.0206	-3.2315	0.953456	FALSE	2.28427
AMI	whiB6_A91E	whiB6	91	-1.12531	1.49111	-0.754682	0.45044	1	1.79726	-4.04788	0.953456	FALSE	2.28427
AMI	rrs_g5t	rrs	5	-1.1335	1.50079	-0.755264	0.450091	5	1.80806	-4.07505	0.953456	TRUE	2.28427
AMI	ccsA_Y134H	ccsA	134	-1.14118	0.892906	-1.27805	0.201231	3	0.608916	-2.89128	0.953456	TRUE	2.28427
AMI	rrs_t200a	rrs	200	-1.16502	1.49187	-0.780912	0.434854	1	1.75905	-4.08909	0.953456	FALSE	2.28427
AMI	rrs_g1379a	rrs	1379	-1.16502	0.900478	-1.29378	0.195742	3	0.599918	-2.92996	0.953456	FALSE	2.28427
AMI	whiB6_T44P	whiB6	44	-1.16654	1.5029	-0.776189	0.437637	11	1.77915	-4.11222	0.953456	TRUE	2.28427
AMI	whiB6_255_indel	whiB6	255	-1.18922	0.853355	-1.39359	0.163442	3	0.483351	-2.8618	0.953456	TRUE	2.28427
AMI	eis_P30H	eis	30	-1.21573	0.901092	-1.34918	0.177281	3	0.55041	-2.98187	0.953456	FALSE	2.28427
AMI	eis_L140V	eis	140	-1.21573	1.07969	-1.126	0.260166	2	0.900463	-3.33193	0.953456	FALSE	2.28427
AMI	whiB6_A66T	whiB6	66	-1.21826	0.471911	-2.58155	0.0098359	10	-0.293314	-2.1432	0.128481	FALSE	2.28427
AMI	whiB6_L92S	whiB6	92	-1.2269	0.486214	-2.52337	0.0116238	6	-0.273916	-2.17988	0.142904	TRUE	2.28427
AMI	aftB_I407V	aftB	407	-1.22811	1.07145	-1.14621	0.251708	2	0.871934	-3.32815	0.953456	FALSE	2.28427
AMI	whiB6_W41!	whiB6	41	-1.23415	0.769953	-1.60289	0.108959	6	0.274959	-2.74326	0.799035	TRUE	2.28427
AMI	whiB6_W60S	whiB6	60	-1.24137	1.49086	-0.832655	0.405039	2	1.68071	-4.16344	0.953456	TRUE	2.28427
AMI	whiB6_R96!	whiB6	96	-1.24861	1.02401	-1.21933	0.22272	3	0.75846	-3.25568	0.953456	TRUE	2.28427
AMI	whiB7_R12K	whiB7	12	-1.31809	1.06412	-1.23867	0.215466	2	0.767573	-3.40376	0.953456	FALSE	2.28427
AMI	rrs_-10_indel	rrs	-10	-1.40261	1.53726	-0.912413	0.361551	1	1.61041	-4.41563	0.953456	FALSE	2.28427
AMI	rrs_c735g	rrs	735	-1.40492	1.49242	-0.941372	0.346514	1	1.52022	-4.33006	0.953456	FALSE	2.28427
EMB	embA_E951D	embA	951	-0.418374	0.149076	-2.80646	0.005009	50	-0.126186	-0.710563	0.0464681	FALSE	1.96733
AMI	ccsA_V6V	ccsA	6	-1.45588	1.05529	-1.3796	0.167711	2	0.612492	-3.52424	0.953456	FALSE	2.28427
AMI	fprA_R200Q	fprA	200	-1.45588	1.07879	-1.34954	0.177163	2	0.658556	-3.57031	0.953456	FALSE	2.28427
AMI	rrs_g1167a	rrs	1167	-1.45588	1.49159	-0.976055	0.329037	1	1.46764	-4.3794	0.953456	FALSE	2.28427
AMI	rrs_159_indel	rrs	159	-1.71855	1.33066	-1.2915	0.196531	2	0.889552	-4.32665	0.953456	FALSE	2.28427
AMI	aftB_A120A	aftB	120	-1.7826	1.62359	-1.09794	0.27223	1	1.39963	-4.96483	0.953456	FALSE	2.28427
AMI	fprA_V162V	fprA	162	-1.9128	1.48874	-1.28484	0.198848	1	1.00514	-4.83074	0.953456	FALSE	2.28427
AMI	_cons	DRUG	16	-2.28427	0.0661007	-34.5574	0	0	-2.15471	-2.41383	0	FALSE	2.28427
EMB	embC_R345R	embC	345	-0.428253	0.130802	-3.27405	0.0010602	51	-0.17188	-0.684625	0.0118389	FALSE	1.96733
AMI	eis_448_indel	eis	448	-2.59424	1.04993	-2.47086	0.0134787	2	-0.536372	-4.65211	0.156503	FALSE	2.28427
AMI	whiB6_L95R	whiB6	95	-2.60643	0.601669	-4.332	1.48e-05	3	-1.42716	-3.7857	0.0003256	TRUE	2.28427
AMI	eis_V1V	eis	1	-2.61967	0.851579	-3.07625	0.0020962	3	-0.950578	-4.28877	0.0312933	TRUE	2.28427
BDQ	atpE_E61D	atpE	61	4.37923	0.509873	8.58887	0	3	5.37858	3.37988	0	TRUE	2.99834
BDQ	Rv0678_324_indel	Rv0678	324	4.086	0.967912	4.22145	2.43e-05	1	5.9831	2.18889	0.000234252	FALSE	2.99834
BDQ	mmpL5_L709I	mmpL5	709	3.63737	0.967993	3.75764	0.0001715	1	5.53464	1.7401	0.00137772	FALSE	2.99834
BDQ	Rv0678_P48L	Rv0678	48	3.38591	0.741658	4.56533	4.99e-06	2	4.83957	1.93226	5.72662e-05	FALSE	2.99834
BDQ	Rv0678_A36V	Rv0678	36	2.90276	0.65319	4.44397	8.83e-06	2	4.18301	1.62251	9.2523e-05	TRUE	2.99834
BDQ	Rv0678_Q115!	Rv0678	115	2.89657	0.884657	3.27422	0.0010595	1	4.6305	1.16264	0.00750999	FALSE	2.99834
BDQ	Rv0678_L83P	Rv0678	83	2.78951	0.898928	3.10315	0.0019147	1	4.55141	1.02761	0.0131841	FALSE	2.99834
BDQ	Rv0678_274_indel	Rv0678	274	2.76277	0.698657	3.9544	7.67e-05	2	4.13214	1.3934	0.000660168	FALSE	2.99834
BDQ	Rv0678_464_indel	Rv0678	464	2.67913	0.62657	4.27588	1.9e-05	2	3.90721	1.45106	0.000190792	FALSE	2.99834
BDQ	Rv0678_R90C	Rv0678	90	2.47991	0.435532	5.69398	1.24e-08	7	3.33356	1.62627	1.99227e-07	TRUE	2.99834
BDQ	Rv0678_R50Q	Rv0678	50	2.37733	0.973418	2.44225	0.014596	1	4.28523	0.469432	0.0689733	FALSE	2.99834
BDQ	Rv0678_I108V	Rv0678	108	2.36636	0.967374	2.44617	0.0144384	1	4.26241	0.470306	0.0689733	FALSE	2.99834
BDQ	Rv0678_I108T	Rv0678	108	2.36369	0.776429	3.04431	0.0023322	2	3.88549	0.841888	0.0156128	TRUE	2.99834
BDQ	Rv0678_Q51R	Rv0678	51	2.28548	0.556163	4.10938	3.97e-05	3	3.37556	1.19541	0.000367988	FALSE	2.99834
BDQ	Rv3249c_V210V	Rv3249c	210	2.18682	0.942829	2.31943	0.0203718	5	4.03477	0.338881	0.0876715	TRUE	2.99834
BDQ	Rv0678_L117R	Rv0678	117	2.15884	0.543458	3.97242	7.11e-05	3	3.22402	1.09366	0.000634633	TRUE	2.99834
BDQ	Rv0678_138_indel	Rv0678	138	2.08833	0.336964	6.1975	5.74e-10	7	2.74878	1.42788	9.881e-09	TRUE	2.99834
BDQ	Rv0678_141_indel	Rv0678	141	2.08523	0.230902	9.03084	0	16	2.5378	1.63267	0	TRUE	2.99834
BDQ	Rv0678_192_indel	Rv0678	192	2.07104	0.30365	6.82047	9.07e-12	36	2.66619	1.47588	1.82156e-10	TRUE	2.99834
BDQ	mmpL5_A298A	mmpL5	298	2.01054	0.571333	3.51903	0.0004331	3	3.13035	0.890724	0.00316294	TRUE	2.99834
BDQ	Rv0678_M146T	Rv0678	146	1.83922	0.37012	4.96926	6.72e-07	11	2.56466	1.11379	8.99733e-06	FALSE	2.99834
BDQ	Rv0678_M139I	Rv0678	139	1.81645	0.627364	2.89537	0.0037871	2	3.04608	0.586818	0.0228173	TRUE	2.99834
BDQ	pepQ_R7Q	pepQ	7	1.70495	1.10661	1.54069	0.123392	4	3.87391	-0.464014	0.337926	FALSE	2.99834
BDQ	Rv0678_N70D	Rv0678	70	1.64913	0.890153	1.85264	0.0639336	1	3.39383	-0.0955649	0.233455	FALSE	2.99834
BDQ	Rv0678_132_indel	Rv0678	132	1.64913	0.890153	1.85264	0.0639336	1	3.39383	-0.0955649	0.233455	FALSE	2.99834
BDQ	mmpL5_F82L	mmpL5	82	1.64264	0.967942	1.69705	0.0896878	1	3.53981	-0.254523	0.282575	FALSE	2.99834
BDQ	pepQ_D26A	pepQ	26	1.60191	0.889689	1.80053	0.0717767	1	3.3457	-0.141877	0.247117	FALSE	2.99834
BDQ	Rv0678_140_indel	Rv0678	140	1.56005	0.632626	2.46599	0.0136633	2	2.8	0.320106	0.0672011	TRUE	2.99834
BDQ	atpE_A18A	atpE	18	1.556	0.73534	2.11602	0.0343428	2	2.99726	0.114731	0.145204	FALSE	2.99834
BDQ	pepQ_V328F	pepQ	328	1.50349	0.647151	2.32325	0.0201657	3	2.77191	0.235078	0.0876715	FALSE	2.99834
BDQ	mmpL5_S125S	mmpL5	125	1.3922	0.889535	1.56508	0.117564	1	3.13568	-0.351292	0.329451	FALSE	2.99834
BDQ	mmpL5_A356A	mmpL5	356	1.14264	0.74075	1.54255	0.12294	2	2.59451	-0.309227	0.337926	FALSE	2.99834
BDQ	pepQ_G80G	pepQ	80	1.10348	0.979131	1.127	0.259743	1	3.02258	-0.815618	0.504823	FALSE	2.99834
BDQ	pepQ_I193T	pepQ	193	1.026	0.648659	1.58172	0.113714	3	2.29737	-0.245376	0.322413	FALSE	2.99834
BDQ	Rv0678_G103S	Rv0678	103	0.964848	0.675766	1.42779	0.153354	2	2.28935	-0.359653	0.384982	TRUE	2.99834
BDQ	mmpL5_A273G:Rv3249c_V83M	mmpL5	273	0.930283	0.64777	1.43613	0.150965	3	2.19991	-0.339347	0.382974	FALSE	2.99834
BDQ	mmpS5_A8V	mmpS5	8	0.917594	0.73534	1.24785	0.212086	2	2.35886	-0.523673	0.452217	FALSE	2.99834
BDQ	Rv0678_G162E	Rv0678	162	0.917594	0.73534	1.24785	0.212086	2	2.35886	-0.523673	0.452217	FALSE	2.99834
BDQ	Rv0678_234_indel:Rv3249c_625_indel	Rv0678	234	0.893689	0.720987	1.23954	0.215147	2	2.30682	-0.519445	0.452217	FALSE	2.99834
BDQ	mmpL5_I920I	mmpL5	920	0.88483	0.648327	1.36479	0.172319	2	2.15555	-0.385892	0.423765	FALSE	2.99834
BDQ	mmpL5_A230V	mmpL5	230	0.873332	0.679194	1.28584	0.198501	2	2.20455	-0.457889	0.440325	TRUE	2.99834
BDQ	mmpS5_I116L	mmpS5	116	0.837118	0.740619	1.1303	0.258352	2	2.28873	-0.614495	0.504823	FALSE	2.99834
BDQ	Rv0678_N4T	Rv0678	4	0.83432	0.684813	1.21832	0.223103	2	2.17655	-0.507913	0.459554	FALSE	2.99834
BDQ	mmpL5_H590P	mmpL5	590	0.806962	0.640801	1.2593	0.207921	2	2.06293	-0.449008	0.451433	FALSE	2.99834
BDQ	pepQ_P69L	pepQ	69	0.800344	0.394454	2.029	0.0424588	6	1.57347	0.0272151	0.173433	FALSE	2.99834
BDQ	mmpL5_H825H	mmpL5	825	0.780524	0.89288	0.874164	0.382029	4	2.53057	-0.969522	0.621534	FALSE	2.99834
BDQ	mmpS5_L134L	mmpS5	134	0.769229	0.473428	1.62481	0.104204	4	1.69715	-0.158689	0.313913	TRUE	2.99834
BDQ	mmpL5_G246G:Rv3249c_L36L	mmpL5	246	0.746018	0.753176	0.990496	0.321932	2	2.22224	-0.730207	0.574708	FALSE	2.99834
BDQ	mmpL5_V123I	mmpL5	123	0.719475	0.672301	1.07017	0.284544	2	2.03718	-0.598236	0.535743	FALSE	2.99834
BDQ	og2mic)	DRUG	18	0.685825	0.0147346	46.5452	0	0	0.714705	0.656945	0	FALSE	2.99834
BDQ	pepQ_D51D	pepQ	51	0.664401	0.898368	0.739564	0.459564	1	2.4252	-1.0964	0.719188	FALSE	2.99834
BDQ	Rv0678_G121G:Rv0678_Q76E	Rv0678	121	0.642644	0.73862	0.870059	0.384268	2	2.09034	-0.805052	0.621534	FALSE	2.99834
BDQ	3.lineage	LINEAGE	3	0.642383	0.0574204	11.1874	0	0	0.754927	0.529839	0	FALSE	2.99834
BDQ	Rv3249c_A17A	Rv3249c	17	0.626323	0.410687	1.52506	0.127244	8	1.43127	-0.178624	0.343765	TRUE	2.99834
BDQ	mmpL5_Y586Y	mmpL5	586	0.621791	0.502333	1.23781	0.215788	4	1.60636	-0.362783	0.452217	FALSE	2.99834
BDQ	Rv3249c_G206S	Rv3249c	206	0.616728	0.595621	1.03544	0.300465	4	1.78415	-0.550689	0.552763	FALSE	2.99834
BDQ	pepQ_V45L	pepQ	45	0.603802	0.348934	1.73042	0.0835555	15	1.28771	-0.0801087	0.27212	FALSE	2.99834
BDQ	mmpL5_L523L	mmpL5	523	0.578275	0.638053	0.906312	0.364771	2	1.82886	-0.672309	0.610485	FALSE	2.99834
BDQ	Rv3249c_F153F	Rv3249c	153	0.577372	0.647294	0.891978	0.372405	3	1.84607	-0.691324	0.618962	FALSE	2.99834
BDQ	mmpL5_L219F	mmpL5	219	0.567697	0.647389	0.876903	0.38054	3	1.83658	-0.701186	0.621534	FALSE	2.99834
BDQ	pepQ_G291G	pepQ	291	0.561441	0.969193	0.579287	0.562396	1	2.46106	-1.33818	0.790744	FALSE	2.99834
BDQ	pepQ_A268A	pepQ	268	0.494022	0.59841	0.825557	0.409055	4	1.66691	-0.678862	0.652863	FALSE	2.99834
BDQ	Rv3249c_S89!	Rv3249c	89	0.47804	0.268826	1.77825	0.0753621	39	1.00494	-0.0488581	0.252254	FALSE	2.99834
BDQ	Rv0678_N98D	Rv0678	98	0.45402	0.423806	1.07129	0.284038	5	1.28468	-0.37664	0.535743	TRUE	2.99834
BDQ	mmpL5_V376V	mmpL5	376	0.438339	0.967742	0.45295	0.650585	1	2.33511	-1.45844	0.847941	FALSE	2.99834
BDQ	mmpL5_T606A	mmpL5	606	0.438339	0.68519	0.639733	0.522346	2	1.78131	-0.904634	0.772303	FALSE	2.99834
BDQ	pepQ_A305V	pepQ	305	0.438339	0.741259	0.591344	0.55429	2	1.89121	-1.01453	0.790744	FALSE	2.99834
BDQ	6.lineage	LINEAGE	5	0.413079	0.433516	0.952858	0.340662	0	1.26277	-0.436612	0.590644	FALSE	2.99834
BDQ	mmpL5_I948A	mmpL5	948	0.397881	0.515388	0.772002	0.440113	3	1.40804	-0.61228	0.69325	FALSE	2.99834
BDQ	Rv0678_E55D	Rv0678	55	0.39513	0.431832	0.91501	0.360187	9	1.24152	-0.45126	0.610485	FALSE	2.99834
BDQ	pepQ_G197R	pepQ	197	0.393323	0.266259	1.47722	0.139618	31	0.915191	-0.128545	0.365737	FALSE	2.99834
BDQ	Rv0678_G65G	Rv0678	65	0.382374	0.932162	0.410201	0.681658	1	2.20941	-1.44466	0.869204	FALSE	2.99834
BDQ	mmpL5_G477R	mmpL5	477	0.366359	0.740778	0.49456	0.620911	2	1.81828	-1.08557	0.840672	FALSE	2.99834
BDQ	mmpL5_P953S	mmpL5	953	0.364893	1.3703	0.266287	0.790018	1	3.05068	-2.32089	0.940193	FALSE	2.99834
BDQ	mmpL5_S160S	mmpL5	160	0.347332	0.967398	0.359037	0.719567	1	2.24343	-1.54877	0.903207	FALSE	2.99834
BDQ	mmpL5_L831L	mmpL5	831	0.347332	0.740809	0.468855	0.639173	2	1.79932	-1.10465	0.847941	FALSE	2.99834
BDQ	Rv0678_V149V	Rv0678	149	0.347332	0.740809	0.468855	0.639173	2	1.79932	-1.10465	0.847941	FALSE	2.99834
BDQ	Rv3249c_R13Q	Rv3249c	13	0.347332	0.684704	0.507274	0.611963	2	1.68935	-0.994687	0.833238	FALSE	2.99834
BDQ	mmpL5_V344L	mmpL5	344	0.344583	0.296219	1.16327	0.24472	11	0.925172	-0.236007	0.487418	TRUE	2.99834
BDQ	Rv3249c_L131L	Rv3249c	131	0.316152	0.681873	0.463652	0.642897	2	1.65262	-1.02032	0.847941	TRUE	2.99834
BDQ	mmpL5_N772S	mmpL5	772	0.293293	0.67931	0.431751	0.665922	2	1.62474	-1.03815	0.858221	TRUE	2.99834
BDQ	mmpS5_N68N	mmpS5	68	0.290134	0.884101	0.328169	0.742784	1	2.02297	-1.4427	0.922737	FALSE	2.99834
BDQ	pepQ_F46L	pepQ	46	0.27516	0.426651	0.64493	0.518972	16	1.1114	-0.561075	0.772303	TRUE	2.99834
BDQ	mmpS5_V67G	mmpS5	67	0.26963	0.684445	0.393939	0.693626	2	1.61114	-1.07188	0.875203	TRUE	2.99834
BDQ	mmpL5_A359T	mmpL5	359	0.269158	0.559283	0.481256	0.630335	3	1.36535	-0.827036	0.847941	FALSE	2.99834
BDQ	mmpL5_Q625Q	mmpL5	625	0.264216	0.666411	0.396476	0.691754	2	1.57038	-1.04195	0.875203	FALSE	2.99834
BDQ	mmpL5_D128N	mmpL5	128	0.263212	0.97079	0.271132	0.78629	3	2.16596	-1.63954	0.940193	FALSE	2.99834
BDQ	mmpS5_T4I	mmpS5	4	0.263212	0.97079	0.271132	0.78629	1	2.16596	-1.63954	0.940193	FALSE	2.99834
BDQ	mmpL5_A44G	mmpL5	44	0.246018	0.977484	0.251685	0.801285	1	2.16189	-1.66985	0.940193	FALSE	2.99834
BDQ	mmpL5_A572V	mmpL5	572	0.246018	0.977484	0.251685	0.801285	1	2.16189	-1.66985	0.940193	FALSE	2.99834
BDQ	pepQ_818_indel	pepQ	818	0.243328	0.314176	0.774495	0.438638	8	0.859112	-0.372457	0.69325	TRUE	2.99834
BDQ	10.siteid	SITEID	12	0.234515	0.0665698	3.52284	0.0004269	0	0.364992	0.104038	0.00316294	FALSE	2.99834
BDQ	20.siteid	SITEID	15	0.224375	0.0825262	2.71883	0.0065513	0	0.386126	0.0626235	0.0358833	FALSE	2.99834
BDQ	mmpL5_V45V	mmpL5	45	0.213964	0.969062	0.220795	0.825252	1	2.11333	-1.6854	0.940193	FALSE	2.99834
BDQ	pepQ_H292H	pepQ	292	0.213964	0.742981	0.28798	0.773362	2	1.67021	-1.24228	0.940193	FALSE	2.99834
BDQ	pepQ_A370V	pepQ	370	0.213964	0.969062	0.220795	0.825252	1	2.11333	-1.6854	0.940193	FALSE	2.99834
BDQ	Rv3249c_A186S	Rv3249c	186	0.213964	0.969062	0.220795	0.825252	1	2.11333	-1.6854	0.940193	FALSE	2.99834
BDQ	mmpL5_A800A	mmpL5	800	0.203824	0.967835	0.210598	0.833201	1	2.10078	-1.69313	0.940193	FALSE	2.99834
BDQ	mmpL5_P927P	mmpL5	927	0.203824	0.967835	0.210598	0.833201	1	2.10078	-1.69313	0.940193	FALSE	2.99834
BDQ	mmpL5_V382A	mmpL5	382	0.168379	0.684087	0.246137	0.805576	2	1.50919	-1.17243	0.940193	FALSE	2.99834
BDQ	mmpL5_G609R	mmpL5	609	0.168379	0.739996	0.22754	0.820004	2	1.61877	-1.28201	0.940193	FALSE	2.99834
BDQ	ns[cluster100])	DRUG	17	0.159779	0.0168191	9.49987	0	0	0.192744	0.126813	0	FALSE	2.99834
BDQ	pepQ_A124A	pepQ	124	0.144293	0.942907	0.15303	0.878375	1	1.99239	-1.7038	0.971286	FALSE	2.99834
BDQ	14.siteid	SITEID	14	0.134853	0.101299	1.33125	0.183109	0	0.333399	-0.063692	0.435066	FALSE	2.99834
BDQ	Rv0678_211_indel	Rv0678	211	0.12427	0.620569	0.200251	0.841284	2	1.34059	-1.09205	0.943021	FALSE	2.99834
BDQ	mmpL5_P180L	mmpL5	180	0.122783	0.588968	0.208472	0.83486	3	1.27716	-1.03159	0.940193	FALSE	2.99834
BDQ	1.lineage	LINEAGE	1	0.0917028	0.082331	1.11383	0.265352	0	0.253072	-0.069666	0.511599	FALSE	2.99834
BDQ	2.lineage	LINEAGE	2	0.0910067	0.0456312	1.9944	0.0461087	0	0.180444	0.00156955	0.185203	FALSE	2.99834
BDQ	mmpL5_I732V	mmpL5	732	0.0888308	0.784465	0.113238	0.909842	2	1.62638	-1.44872	0.977639	FALSE	2.99834
BDQ	mmpL5_V81V	mmpL5	81	0.0543039	0.634002	0.0856525	0.931743	2	1.29695	-1.18834	0.980568	FALSE	2.99834
BDQ	pepQ_M180V	pepQ	180	0.0513638	0.914654	0.0561565	0.955217	1	1.84408	-1.74136	0.981274	FALSE	2.99834
BDQ	mmpL5_L834L	mmpL5	834	0.0488702	0.51124	0.0955915	0.923845	6	1.0509	-0.953161	0.977639	FALSE	2.99834
BDQ	Rv0678_A36A	Rv0678	36	0.0422903	0.529874	0.0798119	0.936387	3	1.08084	-0.996262	0.981171	FALSE	2.99834
BDQ	mmpL5_E512Q	mmpL5	512	0.0374974	0.56209	0.0667106	0.946812	5	1.13919	-1.0642	0.981274	FALSE	2.99834
BDQ	mmpL5_H540R	mmpL5	540	0.0347141	0.973896	0.0356446	0.971566	1	1.94355	-1.87412	0.981274	FALSE	2.99834
BDQ	Rv3249c_P10L	Rv3249c	10	0.0334625	0.736615	0.0454274	0.963767	2	1.47723	-1.4103	0.981274	FALSE	2.99834
BDQ	mmpL5_E723D	mmpL5	723	0.0317767	0.588387	0.0540064	0.95693	3	1.18501	-1.12146	0.981274	TRUE	2.99834
BDQ	mmpL5_Q333E	mmpL5	333	0.0259956	0.967912	0.0268574	0.978573	1	1.9231	-1.87111	0.981274	FALSE	2.99834
BDQ	mmpL5_R946R	mmpL5	946	0.0259956	0.68543	0.037926	0.969747	2	1.36944	-1.31745	0.981274	FALSE	2.99834
BDQ	pepQ_V104L	pepQ	104	0.0259956	0.741481	0.0350591	0.972033	2	1.4793	-1.42731	0.981274	FALSE	2.99834
BDQ	mmpS5_c-31g	mmpS5	-31	0.0215505	0.719272	0.0299615	0.976098	2	1.43132	-1.38822	0.981274	FALSE	2.99834
BDQ	Rv3249c_Y74H	Rv3249c	74	0.0173689	0.739991	0.0234717	0.981274	2	1.46775	-1.43301	0.981274	FALSE	2.99834
BDQ	Rv3249c_R204R	Rv3249c	204	0.0171938	0.170867	0.100626	0.919847	195	0.352094	-0.317706	0.977639	TRUE	2.99834
BDQ	mmpL5_P355P	mmpL5	355	-0.0270434	0.161064	-0.167905	0.866658	110	0.288642	-0.342729	0.966966	FALSE	2.99834
BDQ	mmpL5_S71P	mmpL5	71	-0.0364386	0.520531	-0.0700029	0.944191	4	0.983801	-1.05668	0.981274	FALSE	2.99834
BDQ	mmpL5_L843L	mmpL5	843	-0.0411855	0.435922	-0.0944791	0.924729	6	0.813221	-0.895592	0.977639	TRUE	2.99834
BDQ	mmpL5_V169V	mmpL5	169	-0.0427085	0.324009	-0.131813	0.895132	11	0.592348	-0.677765	0.977639	FALSE	2.99834
BDQ	mmpL5_F888F	mmpL5	888	-0.0535094	0.563647	-0.0949342	0.924367	5	1.05124	-1.15826	0.977639	FALSE	2.99834
BDQ	pepQ_A242T	pepQ	242	-0.0613372	0.650726	-0.0942597	0.924903	3	1.21409	-1.33676	0.977639	FALSE	2.99834
BDQ	mmpL5_F303F	mmpL5	303	-0.0616978	0.519312	-0.118807	0.905428	4	0.956153	-1.07955	0.977639	FALSE	2.99834
BDQ	mmpL5_L919L	mmpL5	919	-0.0691611	0.578397	-0.119574	0.904821	3	1.0645	-1.20282	0.977639	TRUE	2.99834
BDQ	mmpL5_S259S	mmpL5	259	-0.0804573	0.724539	-0.111046	0.91158	2	1.33964	-1.50055	0.977639	FALSE	2.99834
BDQ	Rv3249c_463_indel	Rv3249c	463	-0.0988607	0.64718	-0.152756	0.878591	3	1.16961	-1.36733	0.971286	FALSE	2.99834
BDQ	Rv0678_S2R	Rv0678	2	-0.140742	0.626121	-0.224785	0.822147	3	1.08645	-1.36794	0.940193	FALSE	2.99834
BDQ	mmpL5_L963L	mmpL5	963	-0.152122	0.600544	-0.253308	0.80003	4	1.02494	-1.32919	0.940193	FALSE	2.99834
BDQ	Rv3249c_A165V	Rv3249c	165	-0.154606	0.338784	-0.456356	0.648134	54	0.50941	-0.818622	0.847941	FALSE	2.99834
BDQ	mmpL5_A432A	mmpL5	432	-0.162882	0.684498	-0.237958	0.811914	2	1.17873	-1.5045	0.940193	FALSE	2.99834
BDQ	mmpL5_E476A	mmpL5	476	-0.162882	0.740619	-0.219926	0.825928	2	1.28873	-1.61449	0.940193	FALSE	2.99834
BDQ	mmpL5_A61A	mmpL5	61	-0.184112	0.222737	-0.826588	0.40847	45	0.252452	-0.620675	0.652863	TRUE	2.99834
BDQ	Rv3249c_T154A	Rv3249c	154	-0.197596	0.116651	-1.6939	0.0902833	178	0.0310402	-0.426232	0.282575	FALSE	2.99834
BDQ	mmpL5_A147T	mmpL5	147	-0.204149	0.315661	-0.646733	0.517805	15	0.414547	-0.822844	0.772303	FALSE	2.99834
BDQ	6.siteid	SITEID	10	-0.23004	0.059849	-3.84367	0.0001212	0	-0.112736	-0.347344	0.00100721	FALSE	2.99834
BDQ	mmpL5_G704C	mmpL5	704	-0.274457	0.644654	-0.425743	0.670295	3	0.989065	-1.53798	0.859261	FALSE	2.99834
BDQ	pepQ_A187E	pepQ	187	-0.292333	1.30068	-0.224754	0.822171	3	2.257	-2.84167	0.940193	FALSE	2.99834
BDQ	pepQ_A124V	pepQ	124	-0.303251	1.26614	-0.239509	0.810711	3	2.17838	-2.78488	0.940193	TRUE	2.99834
BDQ	mmpL5_A896T	mmpL5	896	-0.318743	0.735673	-0.433267	0.664821	2	1.12318	-1.76066	0.858221	FALSE	2.99834
BDQ	11.siteid	SITEID	13	-0.322695	0.461208	-0.699673	0.484132	0	0.581272	-1.22666	0.747921	FALSE	2.99834
BDQ	mmpS5_Y58Y	mmpS5	58	-0.331621	0.967365	-0.342809	0.731742	1	1.56441	-2.22766	0.91373	FALSE	2.99834
BDQ	mmpS5_D82E	mmpS5	82	-0.387879	0.744277	-0.521148	0.602263	2	1.0709	-1.84666	0.829403	FALSE	2.99834
BDQ	5.siteid	SITEID	9	-0.39878	0.0609477	-6.54298	6.03e-11	0	-0.279322	-0.518237	1.11787e-09	FALSE	2.99834
BDQ	pepQ_L44L:Rv3249c_T136I	pepQ	44	-0.409872	0.803986	-0.509799	0.610192	2	1.16594	-1.98569	0.833238	FALSE	2.99834
BDQ	pepQ_A185A	pepQ	185	-0.420573	0.752553	-0.558861	0.576256	2	1.05443	-1.89558	0.798148	FALSE	2.99834
BDQ	mmpL5_G138G	mmpL5	138	-0.437426	0.765338	-0.571546	0.56763	2	1.06264	-1.93749	0.790744	FALSE	2.99834
BDQ	mmpL5_Y285Y	mmpL5	285	-0.437426	0.765338	-0.571546	0.56763	2	1.06264	-1.93749	0.790744	FALSE	2.99834
BDQ	mmpL5_A288P	mmpL5	288	-0.438559	0.969193	-0.452499	0.650909	1	1.46106	-2.33818	0.847941	FALSE	2.99834
BDQ	mmpS5_a-36g	mmpS5	-36	-0.461909	0.721722	-0.64001	0.522166	5	0.952665	-1.87648	0.772303	FALSE	2.99834
BDQ	mmpL5_E552G	mmpL5	552	-0.491157	0.75522	-0.650349	0.515467	6	0.989076	-1.97139	0.772303	FALSE	2.99834
BDQ	mmpL5_L886L	mmpL5	886	-0.491157	0.75522	-0.650349	0.515467	2	0.989076	-1.97139	0.772303	FALSE	2.99834
BDQ	Rv0678_P130P	Rv0678	130	-0.503946	0.555846	-0.906629	0.364603	3	0.585512	-1.5934	0.610485	FALSE	2.99834
BDQ	mmpL5_A8A	mmpL5	8	-0.50752	0.44054	-1.15204	0.249304	24	0.355938	-1.37098	0.492478	TRUE	2.99834
BDQ	mmpL5_V387V	mmpL5	387	-0.508387	0.274286	-1.85349	0.0638119	16	0.0292138	-1.04599	0.233455	FALSE	2.99834
BDQ	mmpL5_T10T	mmpL5	10	-0.511794	0.524032	-0.976646	0.328744	3	0.515309	-1.5389	0.582138	TRUE	2.99834
BDQ	mmpL5_M645I	mmpL5	645	-0.52281	0.541112	-0.966175	0.333956	3	0.537771	-1.58339	0.583214	TRUE	2.99834
BDQ	mmpL5_W598R	mmpL5	598	-0.560877	0.406827	-1.37866	0.167999	25	0.236504	-1.35826	0.417399	FALSE	2.99834
BDQ	mmpL5_T10A	mmpL5	10	-0.561661	0.967742	-0.580383	0.561656	1	1.33511	-2.45844	0.790744	FALSE	2.99834
BDQ	Rv0678_M17V	Rv0678	17	-0.561661	0.967742	-0.580383	0.561656	1	1.33511	-2.45844	0.790744	FALSE	2.99834
BDQ	mmpL5_I59T	mmpL5	59	-0.586407	0.562926	-1.04171	0.297545	5	0.516927	-1.68974	0.551603	FALSE	2.99834
BDQ	mmpL5_L836F:mmpL5_Y690Y	mmpL5	836	-0.588641	0.959086	-0.613752	0.539379	1	1.29117	-2.46845	0.783074	FALSE	2.99834
BDQ	mmpL5_V846I	mmpL5	846	-0.588641	0.959086	-0.613752	0.539379	1	1.29117	-2.46845	0.783074	FALSE	2.99834
BDQ	Rv0678_C46C	Rv0678	46	-0.600085	0.959974	-0.625106	0.531901	1	1.28146	-2.48163	0.781636	FALSE	2.99834
AMI	whiB7_t-100c	whiB7	-100	-0.545556	0.178555	-3.05539	0.0022477	94	-0.195588	-0.895524	0.0323979	FALSE	2.28427
BDQ	mmpL5_S782A	mmpL5	782	-0.652668	0.740809	-0.881021	0.378307	2	0.799318	-2.10465	0.621534	FALSE	2.99834
BDQ	pepQ_L252L	pepQ	252	-0.652668	0.967398	-0.674664	0.499889	1	1.24343	-2.54877	0.767346	FALSE	2.99834
BDQ	mmpL5_P693P	mmpL5	693	-0.663369	0.611412	-1.08498	0.277931	3	0.534998	-1.86174	0.531598	FALSE	2.99834
BDQ	mmpL5_T6T	mmpL5	6	-0.66568	0.684679	-0.972252	0.330925	2	0.67629	-2.00765	0.582138	FALSE	2.99834
BDQ	mmpL5_G246S	mmpL5	246	-0.673441	0.188576	-3.57119	0.0003554	36	-0.303831	-1.04305	0.00276295	TRUE	2.99834
BDQ	mmpL5_V337M	mmpL5	337	-0.687887	0.650058	-1.05819	0.289968	3	0.586227	-1.962	0.541722	TRUE	2.99834
BDQ	mmpL5_L192L	mmpL5	192	-0.696515	0.970593	-0.717617	0.472993	2	1.20585	-2.59888	0.735428	TRUE	2.99834
BDQ	mmpS5_G109S	mmpS5	109	-0.705309	1.2235	-0.576467	0.564299	2	1.69276	-3.10338	0.790744	FALSE	2.99834
BDQ	mmpS5_N102N	mmpS5	102	-0.746479	0.751196	-0.993721	0.320359	2	0.725865	-2.21882	0.574708	FALSE	2.99834
BDQ	mmpL5_V247A	mmpL5	247	-0.616601	0.211845	-2.91062	0.0036071	20	-0.201384	-1.03182	0.02229	FALSE	2.99834
EMB	embB_P731L	embB	731	-0.729522	0.209405	-3.48378	0.0004944	19	-0.319088	-1.13996	0.0062109	FALSE	1.96733
BDQ	4.siteid	SITEID	8	-0.846688	0.0650893	-13.0081	0	0	-0.719113	-0.974263	0	FALSE	2.99834
BDQ	pepQ_R170W	pepQ	170	-0.858985	0.670358	-1.28138	0.200059	2	0.454916	-2.17289	0.440325	TRUE	2.99834
BDQ	mmpL5_V214L	mmpL5	214	-0.86078	0.445012	-1.93429	0.053078	6	0.0114429	-1.733	0.206319	FALSE	2.99834
BDQ	8.siteid	SITEID	11	-0.916576	0.0608892	-15.0532	0	0	-0.797233	-1.03592	0	FALSE	2.99834
BDQ	3.siteid	SITEID	7	-0.92802	0.0579182	-16.0229	0	0	-0.814501	-1.04154	0	FALSE	2.99834
BDQ	mmpL5_H122R	mmpL5	122	-0.951951	0.793431	-1.19979	0.23022	2	0.603173	-2.50708	0.466014	TRUE	2.99834
BDQ	mmpL5_L221L	mmpL5	221	-0.974004	0.967912	-1.00629	0.314274	5	0.923104	-2.87111	0.569474	FALSE	2.99834
BDQ	mmpL5_A679D	mmpL5	679	-0.974004	0.967912	-1.00629	0.314274	1	0.923104	-2.87111	0.569474	FALSE	2.99834
BDQ	mmpL5_D455G	mmpL5	455	-0.997335	0.750933	-1.32813	0.184136	2	0.474494	-2.46916	0.435066	FALSE	2.99834
BDQ	mmpL5_P632P	mmpL5	632	-1.01325	0.79236	-1.27877	0.200978	2	0.539779	-2.56627	0.440325	FALSE	2.99834
BDQ	mmpL5_M666I	mmpL5	666	-1.01325	0.79236	-1.27877	0.200978	2	0.539779	-2.56627	0.440325	FALSE	2.99834
BDQ	mmpS5_S98P	mmpS5	98	-1.01325	0.79236	-1.27877	0.200978	2	0.539779	-2.56627	0.440325	FALSE	2.99834
BDQ	mmpL5_M903I	mmpL5	903	-1.03346	0.705894	-1.46404	0.143182	2	0.350093	-2.41701	0.371042	FALSE	2.99834
EMB	embB_R741R	embB	741	-0.781301	0.263275	-2.96763	0.0030011	22	-0.265283	-1.29732	0.0296666	FALSE	1.96733
BDQ	mmpL5_G396C	mmpL5	396	-1.10162	0.599768	-1.83675	0.0662471	3	0.0739231	-2.27717	0.238292	TRUE	2.99834
BDQ	Rv0678_418_indel	Rv0678	418	-1.10793	0.908948	-1.21892	0.222876	1	0.673607	-2.88947	0.459554	FALSE	2.99834
BDQ	mmpS5_A133T	mmpS5	133	-1.11138	0.740331	-1.50119	0.133307	2	0.339673	-2.56243	0.353044	FALSE	2.99834
BDQ	mmpL5_A755A	mmpL5	755	-1.11788	0.73519	-1.52053	0.128377	2	0.323091	-2.55885	0.343765	FALSE	2.99834
BDQ	mmpL5_H437R	mmpL5	437	-1.15989	0.476301	-2.4352	0.0148837	6	-0.226336	-2.09344	0.0689802	FALSE	2.99834
BDQ	mmpL5_D424N	mmpL5	424	-1.20834	0.667246	-1.81094	0.0701502	3	0.0994602	-2.51614	0.245017	FALSE	2.99834
BDQ	mmpS5_T24M	mmpS5	24	-1.31919	1.02672	-1.28487	0.198838	3	0.693168	-3.33155	0.440325	FALSE	2.99834
BDQ	mmpL5_G759S	mmpL5	759	-1.3335	1.11579	-1.19512	0.23204	1	0.853443	-3.52044	0.466014	FALSE	2.99834
BDQ	Rv3249c_E185E	Rv3249c	185	-1.41499	1.09669	-1.29023	0.196971	4	0.734532	-3.56451	0.440325	FALSE	2.99834
BDQ	mmpL5_I215V	mmpL5	215	-1.56556	0.674143	-2.32229	0.0202173	3	-0.244236	-2.88688	0.0876715	FALSE	2.99834
BDQ	mmpL5_W833!	mmpL5	833	-1.63701	0.933631	-1.75338	0.0795362	2	0.192904	-3.46693	0.262578	TRUE	2.99834
BDQ	mmpL5_D608N	mmpL5	608	-0.809743	0.305014	-2.65477	0.0079362	13	-0.211915	-1.40757	0.0415788	FALSE	2.99834
BDQ	mmpL5_Y300!	mmpL5	300	-1.90573	0.206721	-9.21885	0	140	-1.50056	-2.3109	0	TRUE	2.99834
BDQ	pepQ_G18G	pepQ	18	-1.9675	1.63632	-1.20239	0.229212	2	1.23969	-5.17469	0.466014	FALSE	2.99834
BDQ	mmpL5_Q707K	mmpL5	707	-1.97238	2.15226	-0.916422	0.359445	1	2.24605	-6.1908	0.610485	FALSE	2.99834
BDQ	mmpL5_I841V	mmpL5	841	-1.97238	2.15226	-0.916422	0.359445	1	2.24605	-6.1908	0.610485	FALSE	2.99834
BDQ	mmpL5_F696L	mmpL5	696	-0.828823	0.168732	-4.91208	9.01e-07	68	-0.498109	-1.15954	1.14285e-05	FALSE	2.99834
BDQ	mmpS5_T4P	mmpS5	4	-2.13348	1.24374	-1.71538	0.0862756	2	0.304244	-4.57121	0.277232	FALSE	2.99834
BDQ	pepQ_T341A:mmpS5_G109D	pepQ	341	-2.19109	1.5201	-1.44141	0.149468	2	0.788308	-5.17049	0.382974	FALSE	2.99834
BDQ	mmpL5_1050_indel	mmpL5	1050	-2.26168	1.24309	-1.8194	0.0688509	3	0.174782	-4.69813	0.244016	FALSE	2.99834
BDQ	mmpL5_395_indel	mmpL5	395	-2.53813	0.557371	-4.55375	5.27e-06	10	-1.44568	-3.63057	5.77305e-05	TRUE	2.99834
BDQ	mmpS5_R29L	mmpS5	29	-2.54364	1.09112	-2.33122	0.0197418	2	-0.405044	-4.68224	0.0876715	FALSE	2.99834
BDQ	Rv0678_M23V	Rv0678	23	-2.60227	1.62194	-1.60442	0.108622	2	0.576732	-5.78126	0.31739	FALSE	2.99834
BDQ	mmpS5_G130R	mmpS5	130	-2.61788	1.55158	-1.68724	0.0915577	2	0.423213	-5.65898	0.28289	FALSE	2.99834
BDQ	mmpL5_L95R	mmpL5	95	-2.63435	1.58187	-1.66533	0.0958464	2	0.466126	-5.73482	0.292392	FALSE	2.99834
INH	inhA_G3G	inhA	3	-0.851949	0.270971	-3.14406	0.0016662	105	-0.320847	-1.38305	0.0104849	FALSE	2.12067
BDQ	mmpL5_P445L	mmpL5	445	-2.64679	1.48768	-1.77914	0.0752166	1	0.269061	-5.56264	0.252254	FALSE	2.99834
BDQ	mmpL5_C597C	mmpL5	597	-2.87763	2.14936	-1.33883	0.180626	1	1.33512	-7.09038	0.435066	FALSE	2.99834
BDQ	mmpL5_851_indel	mmpL5	851	-2.92051	1.56775	-1.86287	0.0624808	2	0.152278	-5.9933	0.233455	FALSE	2.99834
BDQ	mmpL5_2182_indel	mmpL5	2182	-2.96129	1.49839	-1.97632	0.0481192	1	-0.0244466	-5.89813	0.19011	FALSE	2.99834
BDQ	mmpL5_M892V	mmpL5	892	-3.06338	1.20504	-2.54213	0.0110179	2	-0.701494	-5.42527	0.056496	FALSE	2.99834
KAN	whiB7_t-100c	whiB7	-100	-0.868076	0.111457	-7.78841	6.88e-15	112	-0.64962	-1.08653	2.3908e-13	FALSE	1.38271
BDQ	mmpL5_2754_indel	mmpL5	2754	-3.10767	1.51993	-2.04461	0.0408932	2	-0.128603	-6.08673	0.169918	FALSE	2.99834
BDQ	mmpL5_G876D	mmpL5	876	-3.14688	2.36011	-1.33336	0.182414	1	1.47895	-7.7727	0.435066	FALSE	2.99834
BDQ	mmpL5_W938R	mmpL5	938	-3.16487	2.39471	-1.32161	0.186299	1	1.52876	-7.85849	0.435903	FALSE	2.99834
EMB	embB_A679T	embB	679	-1.01602	0.351421	-2.89117	0.0038381	6	-0.327233	-1.7048	0.0367361	FALSE	1.96733
CFZ	Rv1979c_L14L	Rv1979c	14	-1.082	0.368112	-2.93932	0.0032894	35	-0.360498	-1.8035	0.0426127	FALSE	2.21284
BDQ	mmpL5_D767A	mmpL5	767	-1.09702	0.380923	-2.87989	0.0039781	10	-0.350409	-1.84363	0.0233835	FALSE	2.99834
BDQ	mmpL5_I282L	mmpL5	282	-3.429	2.14932	-1.59539	0.110626	1	0.783671	-7.64168	0.31739	FALSE	2.99834
BDQ	mmpL5_L329R	mmpL5	329	-3.429	2.14932	-1.59539	0.110626	1	0.783671	-7.64168	0.31739	FALSE	2.99834
BDQ	mmpL5_V346A	mmpL5	346	-3.429	2.14932	-1.59539	0.110626	1	0.783671	-7.64168	0.31739	FALSE	2.99834
BDQ	mmpL5_1000_indel	mmpL5	1000	-3.70618	1.48575	-2.49448	0.0126142	1	-0.794104	-6.61825	0.0633338	FALSE	2.99834
ETH	ethR_F110L	ethR	110	-1.22756	0.295734	-4.15089	3.31e-05	12	-0.647923	-1.8072	0.000262698	FALSE	2.03817
AMI	eis_c-8a	eis	-8	-1.42306	0.434095	-3.27823	0.0010446	19	-0.572238	-2.27389	0.0189845	FALSE	2.28427
BDQ	_cons	DRUG	16	-4.99834	0.0494519	-101.075	0	0	-4.90141	-5.09526	0	FALSE	2.99834
CFZ	Rv1979c_247_indel	Rv1979c	247	4.59007	0.982353	4.67252	2.98e-06	1	6.51548	2.66465	0.000106162	FALSE	2.21284
CFZ	Rv0678_L83P	Rv0678	83	3.60038	0.910961	3.95229	7.74e-05	1	5.38587	1.8149	0.0022059	FALSE	2.21284
CFZ	mmpL5_P445L	mmpL5	445	3.39052	0.973096	3.48426	0.0004935	1	5.29779	1.48325	0.00879047	FALSE	2.21284
CFZ	Rv0678_G103S	Rv0678	103	2.71284	0.968002	2.80252	0.0050706	1	4.61012	0.815557	0.0555816	FALSE	2.21284
CFZ	mmpL5_M638L:Rv1979c_S198S	mmpL5	638	2.69975	0.989337	2.72885	0.0063557	1	4.63885	0.760647	0.0670879	FALSE	2.21284
CFZ	Rv1979c_570_indel	Rv1979c	570	2.5255	0.967587	2.6101	0.0090515	1	4.42197	0.629032	0.0889544	FALSE	2.21284
CFZ	Rv0678_I108V	Rv0678	108	2.45411	0.973509	2.52089	0.0117059	1	4.36219	0.54603	0.111206	FALSE	2.21284
CFZ	mmpL5_A273G:Rv3249c_V83M	mmpL5	273	2.3867	0.634568	3.76114	0.0001691	3	3.63046	1.14295	0.00426075	FALSE	2.21284
CFZ	Rv1979c_1161_indel:Rv1979c_S425A	Rv1979c	1161	2.23834	1.60076	1.3983	0.162023	3	5.37582	-0.899147	0.550081	FALSE	2.21284
CFZ	mmpL5_Q140H	mmpL5	140	1.95197	0.973641	2.00481	0.0449831	1	3.8603	0.0436312	0.308762	FALSE	2.21284
CFZ	Rv0678_Q51R	Rv0678	51	1.90498	0.92966	2.04911	0.0404513	1	3.72711	0.0828428	0.295606	FALSE	2.21284
CFZ	Rv3249c_V210V	Rv3249c	210	1.8996	0.964613	1.96929	0.0489202	6	3.79024	0.00895813	0.324239	TRUE	2.21284
CFZ	Rv0678_L117R	Rv0678	117	1.86715	0.545472	3.42301	0.0006193	3	2.93628	0.79803	0.0103824	TRUE	2.21284
CFZ	Rv0678_Q115!	Rv0678	115	1.80624	0.641634	2.81507	0.0048767	2	3.06384	0.54864	0.0555816	TRUE	2.21284
CFZ	Rv0678_274_indel	Rv0678	274	1.80431	0.569019	3.1709	0.0015197	3	2.91958	0.689027	0.0218994	TRUE	2.21284
CFZ	mmpS5_G109S	mmpS5	109	1.72698	2.44408	0.706597	0.479817	1	6.51736	-3.06341	0.726782	FALSE	2.21284
CFZ	Rv1979c_T480T	Rv1979c	480	1.62798	0.971894	1.67506	0.0939221	1	3.5329	-0.276929	0.46961	FALSE	2.21284
CFZ	Rv0678_R90C	Rv0678	90	1.58145	0.430482	3.67368	0.0002391	8	2.4252	0.737708	0.00486739	TRUE	2.21284
CFZ	Rv0678_P48L	Rv0678	48	1.54032	0.967413	1.59221	0.111338	1	3.43645	-0.355809	0.498509	FALSE	2.21284
CFZ	pepQ_G18G	pepQ	18	1.50504	0.938191	1.6042	0.108671	1	3.3439	-0.333811	0.498509	FALSE	2.21284
CFZ	mmpL5_S71P	mmpL5	71	1.4955	0.973607	1.53605	0.124527	1	3.40377	-0.412766	0.509083	FALSE	2.21284
CFZ	mmpL5_L831L	mmpL5	831	1.4955	0.973607	1.53605	0.124527	1	3.40377	-0.412766	0.509083	FALSE	2.21284
CFZ	Rv3249c_R13Q	Rv3249c	13	1.4955	0.689263	2.16971	0.0300285	2	2.84646	0.144548	0.244518	FALSE	2.21284
CFZ	Rv3249c_A17A	Rv3249c	17	1.48399	0.46584	3.18562	0.0014444	6	2.39704	0.570943	0.0218994	TRUE	2.21284
CFZ	Rv1979c_R409Q	Rv1979c	409	1.36566	0.377299	3.61958	0.0002951	101	2.10517	0.626159	0.0056069	FALSE	2.21284
CFZ	mmpL5_A356A	mmpL5	356	1.29394	0.969001	1.33533	0.181768	1	3.19318	-0.605306	0.571903	FALSE	2.21284
CFZ	pepQ_R7Q	pepQ	7	1.25309	0.886018	1.4143	0.157275	4	2.98969	-0.483503	0.550081	FALSE	2.21284
CFZ	mmpL5_I920I	mmpL5	920	1.24077	0.665743	1.86374	0.0623584	2	2.54563	-0.0640855	0.375869	FALSE	2.21284
CFZ	pepQ_I193T	pepQ	193	1.23266	0.733214	1.68117	0.0927296	2	2.66976	-0.204441	0.46961	FALSE	2.21284
CFZ	pepQ_V298I	pepQ	298	1.23117	0.732881	1.6799	0.0929767	2	2.66762	-0.20528	0.46961	FALSE	2.21284
CFZ	mmpL5_G759S	mmpL5	759	1.18604	1.14415	1.03661	0.299918	1	3.42858	-1.0565	0.694931	FALSE	2.21284
CFZ	Rv1979c_G443G	Rv1979c	443	1.16419	0.73242	1.58951	0.111946	2	2.59973	-0.271355	0.498509	FALSE	2.21284
CFZ	pepQ_D51D	pepQ	51	1.13378	0.930619	1.2183	0.223108	1	2.95779	-0.690236	0.627678	FALSE	2.21284
CFZ	mmpL5_L219F	mmpL5	219	1.09578	0.631844	1.73425	0.082873	3	2.33419	-0.142637	0.454208	FALSE	2.21284
CFZ	Rv0678_E55D	Rv0678	55	1.06641	0.437479	2.43763	0.0147839	9	1.92387	0.208954	0.131669	FALSE	2.21284
CFZ	Rv0678_138_indel	Rv0678	138	1.04377	0.371304	2.81109	0.0049374	6	1.77152	0.316013	0.0555816	TRUE	2.21284
CFZ	Rv1979c_R88H	Rv1979c	88	0.976849	0.731872	1.33473	0.181966	2	2.41132	-0.457619	0.571903	FALSE	2.21284
CFZ	mmpL5_I59T	mmpL5	59	0.924748	0.578638	1.59815	0.11001	4	2.05888	-0.209381	0.498509	FALSE	2.21284
CFZ	mmpL5_S259S	mmpL5	259	0.921968	0.967622	0.952819	0.340682	1	2.81851	-0.974571	0.712143	FALSE	2.21284
CFZ	Rv0678_234_indel:Rv3249c_625_indel	Rv0678	234	0.875215	0.720772	1.21427	0.224643	2	2.28793	-0.537498	0.627678	FALSE	2.21284
CFZ	Rv1979c_T356K	Rv1979c	356	0.853215	0.972782	0.877087	0.380439	1	2.75987	-1.05344	0.712143	FALSE	2.21284
CFZ	mmpL5_I732V	mmpL5	732	0.829064	0.7059	1.17448	0.240203	3	2.21263	-0.554499	0.645505	FALSE	2.21284
CFZ	Rv1979c_608_indel:Rv1979c_T203T	Rv1979c	608	0.801884	1.72506	0.464845	0.642042	5	4.183	-2.57923	0.801791	FALSE	2.21284
CFZ	Rv1979c_613_indel	Rv1979c	613	0.781618	1.72785	0.452363	0.651007	5	4.16821	-2.60498	0.801791	FALSE	2.21284
CFZ	mmpL5_G704C	mmpL5	704	0.7577	0.63174	1.19939	0.230378	3	1.99591	-0.48051	0.635905	FALSE	2.21284
CFZ	mmpL5_A288P	mmpL5	288	0.756509	0.747497	1.01206	0.311511	2	2.2216	-0.708585	0.704608	FALSE	2.21284
CFZ	mmpL5_L919L	mmpL5	919	0.750295	0.961827	0.780072	0.435349	1	2.63548	-1.13489	0.712143	FALSE	2.21284
CFZ	pepQ_V45L	pepQ	45	0.741543	0.363993	2.03724	0.0416255	13	1.45497	0.0281167	0.296582	FALSE	2.21284
CFZ	Rv0678_M73I	Rv0678	73	0.73463	0.96834	0.758649	0.448062	1	2.63258	-1.16332	0.712143	FALSE	2.21284
CFZ	Rv0678_M146T	Rv0678	146	0.733555	0.375661	1.9527	0.0508547	11	1.46985	-0.00274105	0.327531	FALSE	2.21284
CFZ	mmpL5_Q333E	mmpL5	333	0.721314	0.968603	0.744695	0.456456	1	2.61978	-1.17715	0.712143	FALSE	2.21284
CFZ	mmpL5_R946R	mmpL5	946	0.721314	0.968603	0.744695	0.456456	1	2.61978	-1.17715	0.712143	FALSE	2.21284
CFZ	Rv0678_N4T	Rv0678	4	0.721314	0.968603	0.744695	0.456456	1	2.61978	-1.17715	0.712143	FALSE	2.21284
CFZ	pepQ_M180V	pepQ	180	0.720209	0.935952	0.769493	0.441601	1	2.55468	-1.11426	0.712143	FALSE	2.21284
CFZ	mmpL5_P927P	mmpL5	927	0.719822	0.968351	0.743348	0.457271	1	2.61779	-1.17815	0.712143	FALSE	2.21284
CFZ	og2mic)	DRUG	18	0.716101	0.0211563	33.8482	0	0	0.757567	0.674634	0	FALSE	2.21284
CFZ	mmpL5_V123I	mmpL5	123	0.707093	0.735139	0.96185	0.336125	2	2.14796	-0.733778	0.712143	FALSE	2.21284
CFZ	Rv1979c_339_indel	Rv1979c	339	0.701355	0.640101	1.09569	0.273213	3	1.95595	-0.553244	0.675606	TRUE	2.21284
CFZ	mmpL5_Y285Y	mmpL5	285	0.698609	0.639952	1.09166	0.274983	3	1.95291	-0.555697	0.675606	FALSE	2.21284
CFZ	mmpL5_A298A	mmpL5	298	0.697871	0.669803	1.04191	0.297456	2	2.01069	-0.614943	0.694931	TRUE	2.21284
CFZ	Rv0678_141_indel	Rv0678	141	0.691945	0.312638	2.21325	0.0268806	10	1.30472	0.0791749	0.225323	TRUE	2.21284
CFZ	mmpL5_V376V	mmpL5	376	0.652841	0.968002	0.674421	0.500044	1	2.55013	-1.24444	0.730833	FALSE	2.21284
CFZ	pepQ_A305V	pepQ	305	0.652841	0.968002	0.674421	0.500044	1	2.55013	-1.24444	0.730833	FALSE	2.21284
CFZ	pepQ_V104L	pepQ	104	0.644817	0.759676	0.848805	0.39599	2	2.13378	-0.844149	0.712143	FALSE	2.21284
CFZ	mmpL5_F82L	mmpL5	82	0.632047	0.786417	0.803705	0.421568	2	2.17343	-0.909331	0.712143	FALSE	2.21284
CFZ	pepQ_H292H	pepQ	292	0.627681	0.733047	0.856264	0.391852	2	2.06445	-0.80909	0.712143	FALSE	2.21284
CFZ	Rv0678_N98D	Rv0678	98	0.623102	0.422316	1.47544	0.140094	6	1.45084	-0.204637	0.532358	TRUE	2.21284
CFZ	pepQ_A370V	pepQ	370	0.619524	0.97021	0.638547	0.523118	1	2.52114	-1.28209	0.750449	FALSE	2.21284
CFZ	mmpS5_V67G	mmpS5	67	0.601357	0.622349	0.96627	0.333909	3	1.82116	-0.618447	0.712143	TRUE	2.21284
CFZ	Rv0678_192_indel	Rv0678	192	0.588608	0.338121	1.74082	0.0817147	33	1.25133	-0.0741084	0.454208	TRUE	2.21284
CFZ	Rv3249c_463_indel	Rv3249c	463	0.563674	0.54982	1.0252	0.30527	5	1.64132	-0.513973	0.698851	FALSE	2.21284
CFZ	mmpL5_I948A	mmpL5	948	0.525342	0.903792	0.581264	0.561063	1	2.29677	-1.24609	0.770506	FALSE	2.21284
CFZ	Rv1979c_g-69c	Rv1979c	-69	0.518357	0.582564	0.889785	0.373581	4	1.66018	-0.623469	0.712143	FALSE	2.21284
CFZ	mmpS5_c-31g	mmpS5	-31	0.5	2.13766	0.233901	0.815062	2	4.68981	-3.68981	0.893433	FALSE	2.21284
CFZ	mmpL5_L834L	mmpL5	834	0.483705	0.638686	0.757344	0.448844	4	1.73553	-0.76812	0.712143	FALSE	2.21284
CFZ	mmpL5_S160S	mmpL5	160	0.465503	0.967587	0.481097	0.630448	1	2.36197	-1.43097	0.796621	FALSE	2.21284
CFZ	Rv1979c_S262L	Rv1979c	262	0.465503	0.584027	0.797058	0.425418	3	1.6102	-0.67919	0.712143	FALSE	2.21284
CFZ	mmpL5_E723D	mmpL5	723	0.457377	0.599609	0.762792	0.445587	3	1.63261	-0.717857	0.712143	TRUE	2.21284
CFZ	Rv1979c_F172S	Rv1979c	172	0.43792	0.57564	0.760753	0.446805	4	1.56617	-0.690335	0.712143	FALSE	2.21284
CFZ	pepQ_F46L	pepQ	46	0.437153	0.446712	0.978602	0.327777	14	1.31271	-0.438402	0.712143	TRUE	2.21284
CFZ	mmpL5_H437R	mmpL5	437	0.429387	0.480698	0.893258	0.371719	5	1.37155	-0.512781	0.712143	FALSE	2.21284
CFZ	mmpL5_L836F:mmpL5_Y690Y	mmpL5	836	0.424108	0.967489	0.438359	0.661126	1	2.32039	-1.47217	0.801791	FALSE	2.21284
CFZ	Rv1979c_V423A	Rv1979c	423	0.424108	0.967489	0.438359	0.661126	1	2.32039	-1.47217	0.801791	FALSE	2.21284
CFZ	Rv3249c_P10L	Rv3249c	10	0.424108	0.967489	0.438359	0.661126	1	2.32039	-1.47217	0.801791	FALSE	2.21284
CFZ	mmpL5_V81V	mmpL5	81	0.406798	0.908005	0.448013	0.654144	1	2.18649	-1.37289	0.801791	FALSE	2.21284
CFZ	mmpL5_L192L	mmpL5	192	0.398229	0.971666	0.409842	0.681922	2	2.30269	-1.50624	0.816587	TRUE	2.21284
CFZ	Rv0678_S2R	Rv0678	2	0.396486	0.644821	0.614878	0.538635	3	1.66033	-0.867362	0.759955	FALSE	2.21284
CFZ	mmpS5_L134L	mmpS5	134	0.358341	0.630746	0.568122	0.569952	3	1.5946	-0.877921	0.770506	TRUE	2.21284
CFZ	mmpS5_D82E	mmpS5	82	0.353215	0.736899	0.479326	0.631707	2	1.79754	-1.09111	0.796621	FALSE	2.21284
CFZ	Rv1979c_T83A	Rv1979c	83	0.347905	0.785284	0.443031	0.657743	2	1.88706	-1.19125	0.801791	FALSE	2.21284
CFZ	mmpL5_A61A:Rv1979c_1419_indel	mmpL5	61	0.338647	0.215085	1.57448	0.115377	45	0.760214	-0.0829195	0.505882	FALSE	2.21284
CFZ	pepQ_A268A	pepQ	268	0.321781	0.556033	0.578709	0.562786	5	1.4116	-0.768043	0.770506	FALSE	2.21284
CFZ	Rv1979c_1089_indel	Rv1979c	1089	0.298076	0.508385	0.586319	0.557661	5	1.29451	-0.698359	0.770506	FALSE	2.21284
CFZ	mmpL5_P355P	mmpL5	355	0.29721	0.160404	1.85288	0.0639001	99	0.611602	-0.0171831	0.375869	TRUE	2.21284
CFZ	mmpL5_E512Q	mmpL5	512	0.293166	0.530345	0.552783	0.580412	7	1.33264	-0.746311	0.770506	FALSE	2.21284
CFZ	pepQ_G197R	pepQ	197	0.292017	0.299768	0.974143	0.329986	21	0.879561	-0.295528	0.712143	FALSE	2.21284
CFZ	pepQ_G80G	pepQ	80	0.291453	0.828972	0.351584	0.72515	2	1.91624	-1.33333	0.845491	FALSE	2.21284
CFZ	Rv1979c_435_indel	Rv1979c	435	0.255983	0.481237	0.531928	0.594776	5	1.19921	-0.687241	0.770506	FALSE	2.21284
CFZ	14.siteid	SITEID	14	0.254612	0.113993	2.23357	0.0255115	0	0.478039	0.031185	0.220327	FALSE	2.21284
CFZ	Rv1979c_P418P	Rv1979c	418	0.22629	0.681833	0.331884	0.739977	4	1.56268	-1.1101	0.850377	TRUE	2.21284
CFZ	Rv3249c_S89!	Rv3249c	89	0.204082	0.256702	0.795014	0.426605	38	0.707219	-0.299055	0.712143	FALSE	2.21284
CFZ	Rv1979c_A222T	Rv1979c	222	0.202009	0.411307	0.491139	0.623328	30	1.00817	-0.604153	0.793074	FALSE	2.21284
CFZ	3.lineage	LINEAGE	3	0.200655	0.0694991	2.88715	0.0038875	0	0.336873	0.0644363	0.0481712	FALSE	2.21284
CFZ	Rv0678_C46C	Rv0678	46	0.197131	0.732297	0.269195	0.787779	2	1.63243	-1.23817	0.873607	FALSE	2.21284
CFZ	2.lineage	LINEAGE	2	0.187338	0.0500056	3.74633	0.0001794	0	0.285349	0.0893267	0.00426075	FALSE	2.21284
CFZ	Rv3249c_A165V	Rv3249c	165	0.183671	0.341544	0.537766	0.590739	40	0.853097	-0.485755	0.770506	FALSE	2.21284
CFZ	Rv1979c_L174F	Rv1979c	174	0.176756	0.718374	0.24605	0.805643	2	1.58477	-1.23126	0.886519	FALSE	2.21284
CFZ	mmpL5_Y586Y	mmpL5	586	0.176283	0.512838	0.343739	0.731043	4	1.18145	-0.828881	0.845491	FALSE	2.21284
CFZ	mmpL5_M892V	mmpL5	892	0.158696	0.720234	0.22034	0.825606	2	1.57035	-1.25296	0.89899	FALSE	2.21284
CFZ	Rv3249c_T154A	Rv3249c	154	0.155065	0.131154	1.18231	0.237081	135	0.412127	-0.101997	0.643506	FALSE	2.21284
CFZ	ns[cluster100])	DRUG	17	0.129391	0.0207531	6.23477	4.52e-10	0	0.170067	0.0887149	1.84029e-08	FALSE	2.21284
CFZ	Rv1979c_R7S	Rv1979c	7	0.125452	0.404519	0.310126	0.756465	19	0.91831	-0.667406	0.8654	FALSE	2.21284
CFZ	Rv1979c_L417L	Rv1979c	417	0.122319	1.65183	0.0740504	0.94097	2	3.3599	-3.11527	0.964664	FALSE	2.21284
CFZ	Rv3249c_G206S	Rv3249c	206	0.119702	0.587429	0.203772	0.838531	4	1.27106	-1.03166	0.89899	FALSE	2.21284
CFZ	mmpL5_D455G	mmpL5	455	0.112222	0.733182	0.153061	0.87835	2	1.54926	-1.32482	0.929918	FALSE	2.21284
CFZ	pepQ_P69L	pepQ	69	0.0734926	0.342729	0.214433	0.830209	13	0.745242	-0.598256	0.89899	FALSE	2.21284
CFZ	Rv1979c_Y51N	Rv1979c	51	0.0727544	0.35164	0.2069	0.836088	111	0.76197	-0.616461	0.89899	TRUE	2.21284
CFZ	mmpL5_N772S	mmpL5	772	0.0646199	0.79598	0.0811829	0.935296	2	1.62474	-1.4955	0.964664	TRUE	2.21284
CFZ	mmpS5_I116L	mmpS5	116	0.0616741	0.769817	0.0801152	0.936146	3	1.57052	-1.44717	0.964664	FALSE	2.21284
CFZ	Rv1979c_A392A	Rv1979c	392	0.0594253	0.785967	0.075608	0.939731	2	1.59992	-1.48107	0.964664	FALSE	2.21284
CFZ	mmpL5_G396C	mmpL5	396	0.0582884	0.756403	0.0770599	0.938576	2	1.54084	-1.42426	0.964664	TRUE	2.21284
CFZ	mmpL5_A572V	mmpL5	572	0.0499123	0.897232	0.0556292	0.955637	2	1.80849	-1.70866	0.965804	FALSE	2.21284
CFZ	pepQ_L44L:Rv3249c_T136I	pepQ	44	0.0499123	0.897232	0.0556292	0.955637	2	1.80849	-1.70866	0.965804	FALSE	2.21284
CFZ	Rv1979c_E38K	Rv1979c	38	0.0497848	0.743612	0.0669499	0.946622	3	1.50726	-1.40769	0.965804	FALSE	2.21284
CFZ	Rv1979c_D249E	Rv1979c	249	0.03947	0.659359	0.0598612	0.952266	3	1.33181	-1.25287	0.965804	FALSE	2.21284
CFZ	20.siteid	SITEID	15	0.0333167	0.097572	0.341457	0.732759	0	0.224558	-0.157924	0.845491	FALSE	2.21284
CFZ	pepQ_A124V	pepQ	124	0.0300643	1.32025	0.0227716	0.981832	3	2.61776	-2.55763	0.982646	TRUE	2.21284
CFZ	pepQ_A187E	pepQ	187	0.0292875	1.34649	0.0217511	0.982646	3	2.6684	-2.60983	0.982646	FALSE	2.21284
CFZ	mmpL5_T606A	mmpL5	606	-0.0316445	0.753002	-0.0420244	0.966479	2	1.44424	-1.50753	0.973309	FALSE	2.21284
CFZ	mmpL5_F696L	mmpL5	696	-0.0417643	0.205635	-0.203099	0.839058	70	0.361281	-0.444809	0.89899	FALSE	2.21284
CFZ	Rv1979c_689_indel	Rv1979c	689	-0.0488169	0.645151	-0.0756674	0.939684	4	1.21568	-1.31331	0.964664	FALSE	2.21284
CFZ	mmpL5_A147T	mmpL5	147	-0.0603155	0.354447	-0.170168	0.864878	13	0.634401	-0.755032	0.91974	FALSE	2.21284
CFZ	10.siteid	SITEID	12	-0.0669812	0.0766838	-0.873473	0.382406	0	0.083319	-0.217281	0.712143	FALSE	2.21284
CFZ	mmpL5_L843L	mmpL5	843	-0.085444	0.570643	-0.149733	0.880975	5	1.03302	-1.20391	0.929918	TRUE	2.21284
CFZ	mmpL5_A8A	mmpL5	8	-0.108881	0.416629	-0.261337	0.793833	27	0.707713	-0.925474	0.876908	TRUE	2.21284
CFZ	11.siteid	SITEID	13	-0.119546	0.419091	-0.28525	0.775453	0	0.701873	-0.940964	0.870095	FALSE	2.21284
CFZ	1.lineage	LINEAGE	1	-0.133392	0.103018	-1.29485	0.195374	0	0.0685229	-0.335308	0.594806	FALSE	2.21284
CFZ	Rv1979c_V2A	Rv1979c	2	-0.146539	0.670042	-0.218701	0.826883	3	1.16674	-1.45982	0.89899	FALSE	2.21284
CFZ	Rv3249c_R204R	Rv3249c	204	-0.153454	0.24654	-0.62243	0.533659	181	0.329765	-0.636673	0.756681	TRUE	2.21284
CFZ	mmpL5_F888F	mmpL5	888	-0.15491	0.561203	-0.276031	0.782524	5	0.945049	-1.25487	0.872867	FALSE	2.21284
CFZ	Rv0678_I108T	Rv0678	108	-0.155958	1.14174	-0.136597	0.89135	1	2.08185	-2.39376	0.937397	FALSE	2.21284
CFZ	Rv1979c_V426I	Rv1979c	426	-0.17419	0.184422	-0.944518	0.344905	76	0.187278	-0.535658	0.712143	FALSE	2.21284
CFZ	mmpL5_V169V	mmpL5	169	-0.181437	0.419574	-0.432432	0.665428	8	0.640928	-1.0038	0.803589	FALSE	2.21284
CFZ	mmpL5_H825H	mmpL5	825	-0.196349	2.01281	-0.0975496	0.92229	3	3.74875	-4.14145	0.964664	FALSE	2.21284
CFZ	Rv1979c_S358!	Rv1979c	358	-0.217735	0.754021	-0.288765	0.772761	2	1.26015	-1.69562	0.870095	TRUE	2.21284
CFZ	Rv1979c_I104T	Rv1979c	104	-0.241972	0.356592	-0.678569	0.497411	19	0.456948	-0.940893	0.730833	FALSE	2.21284
CFZ	mmpL5_L963L	mmpL5	963	-0.25666	0.664044	-0.386511	0.699118	3	1.04487	-1.55819	0.826758	FALSE	2.21284
CFZ	Rv3249c_F153F	Rv3249c	153	-0.265369	0.96834	-0.274046	0.784049	1	1.63258	-2.16332	0.872867	FALSE	2.21284
CFZ	Rv1979c_a-50c	Rv1979c	-50	-0.268696	0.213638	-1.25771	0.208495	86	0.150035	-0.687427	0.606339	FALSE	2.21284
CFZ	6.siteid	SITEID	10	-0.269127	0.0676321	-3.97928	6.91e-05	0	-0.136568	-0.401686	0.00218817	FALSE	2.21284
CFZ	Rv1979c_S358L	Rv1979c	358	-0.273427	0.776529	-0.352115	0.724752	2	1.24857	-1.79542	0.845491	FALSE	2.21284
CFZ	mmpL5_V387V	mmpL5	387	-0.27366	0.319259	-0.857174	0.391349	13	0.352087	-0.899408	0.712143	TRUE	2.21284
CFZ	mmpL5_V247A	mmpL5	247	-0.274097	0.268049	-1.02256	0.306513	15	0.251278	-0.799473	0.698851	FALSE	2.21284
CFZ	Rv3249c_A186S	Rv3249c	186	-0.280178	0.968351	-0.289335	0.772325	1	1.61779	-2.17815	0.870095	FALSE	2.21284
CFZ	pepQ_A185A	pepQ	185	-0.349865	0.59887	-0.584209	0.55908	4	0.82392	-1.52365	0.770506	FALSE	2.21284
CFZ	Rv1979c_g-70a	Rv1979c	-70	-0.370878	0.504842	-0.73464	0.462559	5	0.618614	-1.36037	0.716463	FALSE	2.21284
CFZ	pepQ_818_indel	pepQ	818	-0.381738	0.450589	-0.847197	0.396885	6	0.501417	-1.26489	0.712143	TRUE	2.21284
CFZ	mmpS5_T24M	mmpS5	24	-0.389602	1.98795	-0.195981	0.844625	2	3.50679	-4.28599	0.901566	FALSE	2.21284
CFZ	Rv0678_A36A	Rv0678	36	-0.391252	0.548203	-0.713698	0.475414	3	0.683227	-1.46573	0.726782	FALSE	2.21284
CFZ	Rv1979c_324_indel	Rv1979c	324	-0.410405	0.534865	-0.767306	0.4429	7	0.637931	-1.45874	0.712143	TRUE	2.21284
CFZ	Rv1979c_V52G	Rv1979c	52	-0.413146	0.622558	-0.663627	0.506929	7	0.807067	-1.63336	0.737116	FALSE	2.21284
CFZ	Rv1979c_T270A	Rv1979c	270	-0.423005	0.335017	-1.26264	0.20672	22	0.233629	-1.07964	0.606339	FALSE	2.21284
CFZ	Rv0678_418_indel	Rv0678	418	-0.43509	0.628254	-0.692537	0.4886	3	0.796289	-1.66647	0.729063	FALSE	2.21284
CFZ	Rv1979c_E38D	Rv1979c	38	-0.453684	0.408563	-1.11044	0.26681	35	0.3471	-1.25447	0.672928	TRUE	2.21284
CFZ	mmpL5_P953S:Rv1979c_V384I	mmpL5	953	-0.476261	1.37121	-0.347329	0.728344	1	2.21131	-3.16383	0.845491	FALSE	2.21284
CFZ	Rv1979c_A105T	Rv1979c	105	-0.488941	0.918554	-0.532295	0.594522	3	1.31142	-2.28931	0.770506	TRUE	2.21284
CFZ	mmpL5_A359T	mmpL5	359	-0.51062	0.666473	-0.766152	0.443586	3	0.795668	-1.81691	0.712143	FALSE	2.21284
CFZ	8.siteid	SITEID	11	-0.54429	0.0694737	-7.83448	4.66e-15	0	-0.408122	-0.680458	2.2135e-13	FALSE	2.21284
CFZ	pepQ_A242T	pepQ	242	-0.561207	0.790302	-0.710117	0.477631	2	0.987785	-2.1102	0.726782	FALSE	2.21284
CFZ	Rv1979c_A406T	Rv1979c	406	-0.578188	0.94934	-0.609043	0.542496	1	1.28252	-2.43889	0.761633	FALSE	2.21284
CFZ	mmpL5_T10T	mmpL5	10	-0.583724	0.7337	-0.795589	0.426271	3	0.854328	-2.02178	0.712143	TRUE	2.21284
CFZ	mmpL5_G246S	mmpL5	246	-0.602666	0.227421	-2.65	0.0080491	34	-0.156921	-1.04841	0.0819283	TRUE	2.21284
CFZ	mmpL5_D608N	mmpL5	608	-0.614257	0.36329	-1.69082	0.0908717	11	0.0977914	-1.3263	0.46961	FALSE	2.21284
CFZ	mmpL5_W598R	mmpL5	598	-0.629511	0.434173	-1.44991	0.147084	21	0.221468	-1.48049	0.537423	FALSE	2.21284
CFZ	Rv1979c_E403G	Rv1979c	403	-0.672608	0.600443	-1.12019	0.262634	7	0.50426	-1.84948	0.671343	TRUE	2.21284
CFZ	mmpL5_G477R	mmpL5	477	-0.686019	2.26674	-0.302646	0.762159	1	3.75678	-5.12882	0.8654	FALSE	2.21284
CFZ	mmpL5_A432A	mmpL5	432	-0.690984	2.25355	-0.306621	0.759132	1	3.72597	-5.10793	0.8654	FALSE	2.21284
CFZ	mmpL5_L221L	mmpL5	221	-0.713927	0.685477	-1.0415	0.297642	8	0.629608	-2.05746	0.694931	TRUE	2.21284
CFZ	Rv0678_L40V	Rv0678	40	-0.715799	0.434248	-1.64836	0.0992779	13	0.135327	-1.56692	0.487831	FALSE	2.21284
CFZ	mmpL5_G609R	mmpL5	609	-0.738044	0.782874	-0.942737	0.345815	2	0.796388	-2.27248	0.712143	FALSE	2.21284
CFZ	3.siteid	SITEID	7	-0.771267	0.0630365	-12.2352	0	0	-0.647715	-0.894818	0	FALSE	2.21284
CFZ	mmpL5_V214L	mmpL5	214	-0.825464	0.676586	-1.22004	0.222448	3	0.500644	-2.15157	0.627678	FALSE	2.21284
CFZ	Rv0678_G162E	Rv0678	162	-0.830253	2.25113	-0.368816	0.712265	1	3.58196	-5.24247	0.838824	FALSE	2.21284
CFZ	Rv1979c_A10V	Rv1979c	10	-0.830253	1.59699	-0.519888	0.603142	2	2.29984	-3.96034	0.774143	FALSE	2.21284
CFZ	mmpS5_g-74t	mmpS5	-74	-0.837178	0.335341	-2.4965	0.0125425	48	-0.179911	-1.49445	0.11531	FALSE	2.21284
CFZ	4.siteid	SITEID	8	-0.841749	0.075467	-11.1539	0	0	-0.693834	-0.989664	0	FALSE	2.21284
CFZ	mmpL5_E552G	mmpL5	552	-0.872018	1.58992	-0.548467	0.583371	5	2.24422	-3.98825	0.770506	FALSE	2.21284
CFZ	mmpL5_L886L	mmpL5	886	-0.872018	1.58992	-0.548467	0.583371	2	2.24422	-3.98825	0.770506	FALSE	2.21284
CFZ	mmpL5_1050_indel	mmpL5	1050	-0.872018	1.1266	-0.774027	0.438915	4	1.33611	-3.08015	0.712143	FALSE	2.21284
CFZ	Rv1979c_L336L	Rv1979c	336	-0.872018	2.24612	-0.388233	0.697844	1	3.53038	-5.27442	0.826758	FALSE	2.21284
CFZ	5.siteid	SITEID	9	-0.887479	0.0679278	-13.065	0	0	-0.754341	-1.02062	0	FALSE	2.21284
CFZ	mmpL5_V344L	mmpL5	344	-0.934543	0.434604	-2.15033	0.031529	10	-0.0827187	-1.78637	0.249605	TRUE	2.21284
CFZ	pepQ_V328F	pepQ	328	-0.95968	2.24419	-0.427629	0.668921	1	3.43892	-5.35828	0.804399	FALSE	2.21284
CFZ	Rv1979c_D347G	Rv1979c	347	-0.962938	2.41601	-0.398565	0.690214	1	3.77245	-5.69832	0.823058	FALSE	2.21284
CFZ	mmpL5_W833!	mmpL5	833	-0.984426	1.03268	-0.953271	0.340453	2	1.03963	-3.00848	0.712143	TRUE	2.21284
CFZ	mmpL5_H122R	mmpL5	122	-1.01602	2.25476	-0.450611	0.65227	1	3.40332	-5.43536	0.801791	FALSE	2.21284
CFZ	mmpL5_G246G:Rv3249c_L36L	mmpL5	246	-1.01602	1.62595	-0.624879	0.53205	2	2.17084	-4.20289	0.756681	FALSE	2.21284
CFZ	mmpL5_Y300!	mmpL5	300	-1.04609	0.283478	-3.69019	0.0002241	125	-0.490471	-1.6017	0.00486739	TRUE	2.21284
CFZ	mmpL5_G876D	mmpL5	876	-1.07769	2.40782	-0.447578	0.654458	1	3.64164	-5.79702	0.801791	FALSE	2.21284
BDQ	mmpS5_g-74t	mmpS5	-74	-1.67693	0.351233	-4.7744	1.8e-06	63	-0.988512	-2.36535	2.169e-05	FALSE	2.99834
CFZ	Rv1979c_S175L	Rv1979c	175	-1.15833	1.51151	-0.76634	0.443474	2	1.80423	-4.12088	0.712143	TRUE	2.21284
CFZ	mmpL5_Q707K	mmpL5	707	-1.16047	1.59289	-0.728537	0.466285	2	1.96158	-4.28253	0.718331	FALSE	2.21284
CFZ	mmpL5_I841V	mmpL5	841	-1.16047	2.24822	-0.516174	0.605733	1	3.24604	-5.56699	0.774143	FALSE	2.21284
CFZ	mmpL5_D128N	mmpL5	128	-1.16948	2.24664	-0.520544	0.602684	2	3.23394	-5.5729	0.774143	FALSE	2.21284
CFZ	mmpL5_L523L	mmpL5	523	-1.18262	1.70466	-0.693756	0.487835	2	2.15851	-4.52374	0.729063	FALSE	2.21284
CFZ	mmpL5_T6T	mmpL5	6	-1.20606	2.24487	-0.537253	0.591093	1	3.19388	-5.60601	0.770506	FALSE	2.21284
CFZ	mmpL5_G138G	mmpL5	138	-1.20606	2.24487	-0.537253	0.591093	1	3.19388	-5.60601	0.770506	FALSE	2.21284
CFZ	mmpL5_P632P	mmpL5	632	-1.20606	1.6122	-0.748085	0.454409	2	1.95385	-4.36598	0.712143	FALSE	2.21284
CFZ	mmpL5_M666I	mmpL5	666	-1.20606	2.24487	-0.537253	0.591093	1	3.19388	-5.60601	0.770506	FALSE	2.21284
CFZ	mmpL5_D767A	mmpL5	767	-1.20606	0.742516	-1.62429	0.104313	10	0.249267	-2.6614	0.498509	FALSE	2.21284
CFZ	mmpS5_a-36g	mmpS5	-36	-1.20606	1.58815	-0.759415	0.447605	4	1.90671	-4.31884	0.712143	FALSE	2.21284
CFZ	mmpS5_S98P:Rv1979c_H98Y	mmpS5	98	-1.20606	1.6122	-0.748085	0.454409	2	1.95385	-4.36598	0.712143	FALSE	2.21284
CFZ	Rv0678_G121G:Rv0678_Q76E	Rv0678	121	-1.20606	2.24487	-0.537253	0.591093	1	3.19388	-5.60601	0.770506	FALSE	2.21284
CFZ	Rv1979c_V2V	Rv1979c	2	-1.21371	1.34919	-0.89958	0.368344	3	1.43071	-3.85812	0.712143	FALSE	2.21284
CFZ	Rv0678_G65G	Rv0678	65	-1.24308	2.28128	-0.544907	0.585817	1	3.22822	-5.71439	0.770506	FALSE	2.21284
CFZ	mmpL5_V337M	mmpL5	337	-1.26178	0.787884	-1.60148	0.10927	2	0.282469	-2.80604	0.498509	TRUE	2.21284
CFZ	mmpL5_L95R	mmpL5	95	-1.28542	1.65204	-0.778081	0.436521	2	1.95257	-4.52341	0.712143	FALSE	2.21284
CFZ	Rv1979c_L439L	Rv1979c	439	-1.32638	2.4104	-0.550273	0.582132	1	3.398	-6.05076	0.770506	FALSE	2.21284
CFZ	mmpL5_H590P	mmpL5	590	-1.33405	0.873784	-1.52675	0.126824	3	0.37857	-3.04666	0.509083	FALSE	2.21284
CFZ	Rv1979c_V273A	Rv1979c	273	-1.35215	0.803581	-1.68266	0.0924411	4	0.222866	-2.92717	0.46961	FALSE	2.21284
CFZ	mmpL5_A755A	mmpL5	755	-1.36783	0.978458	-1.39795	0.162129	3	0.549946	-3.28561	0.550081	FALSE	2.21284
CFZ	mmpS5_A133T	mmpS5	133	-1.37434	1.22995	-1.11739	0.263826	2	1.03636	-3.78504	0.671343	FALSE	2.21284
CFZ	mmpL5_606_indel	mmpL5	606	-1.39267	0.651721	-2.13691	0.0326053	25	-0.115296	-2.67004	0.251126	FALSE	2.21284
CFZ	mmpS5_T4P	mmpS5	4	-1.41002	1.21772	-1.15792	0.246896	2	0.976705	-3.79675	0.645555	FALSE	2.21284
CFZ	mmpL5_F303F	mmpL5	303	-1.42243	0.978215	-1.4541	0.145918	3	0.494875	-3.33973	0.537423	FALSE	2.21284
CFZ	mmpL5_P693P	mmpL5	693	-1.43762	1.05785	-1.359	0.174146	3	0.635769	-3.51101	0.571903	FALSE	2.21284
CFZ	mmpL5_I386I	mmpL5	386	-1.44464	2.24625	-0.643135	0.520137	1	2.95801	-5.84729	0.750449	FALSE	2.21284
CFZ	Rv1979c_L428L	Rv1979c	428	-1.44702	1.57185	-0.920587	0.357266	2	1.6338	-4.52785	0.712143	TRUE	2.21284
CFZ	mmpL5_E476A	mmpL5	476	-1.45968	1.08316	-1.34761	0.177785	2	0.663323	-3.58268	0.571903	FALSE	2.21284
CFZ	mmpL5_G477G	mmpL5	477	-1.45968	1.48551	-0.982608	0.3258	1	1.45193	-4.37129	0.712143	FALSE	2.21284
CFZ	mmpS5_c-9t	mmpS5	-9	-1.45968	1.08316	-1.34761	0.177785	2	0.663323	-3.58268	0.571903	FALSE	2.21284
CFZ	mmpL5_M645I	mmpL5	645	-1.46561	0.732809	-1.99999	0.0455017	3	-0.0293021	-2.90191	0.308762	TRUE	2.21284
CFZ	mmpL5_Q625Q	mmpL5	625	-1.47654	1.68484	-0.876368	0.38083	2	1.82574	-4.77882	0.712143	FALSE	2.21284
CFZ	pepQ_T341A:mmpS5_G109D	pepQ	341	-1.49021	1.58757	-0.93867	0.3479	2	1.62143	-4.60185	0.712143	FALSE	2.21284
CFZ	Rv1979c_A331V	Rv1979c	331	-1.49021	1.61163	-0.924656	0.355145	2	1.6686	-4.64901	0.712143	FALSE	2.21284
CFZ	Rv1979c_T187T	Rv1979c	187	-1.49238	1.52944	-0.975765	0.329181	2	1.50533	-4.49008	0.712143	FALSE	2.21284
CFZ	Rv0678_M23V	Rv0678	23	-1.50302	1.65195	-0.909849	0.362902	2	1.73479	-4.74084	0.712143	FALSE	2.21284
CFZ	Rv1979c_a-16c	Rv1979c	-16	-1.53458	1.07881	-1.42248	0.154888	2	0.579882	-3.64904	0.550081	FALSE	2.21284
CFZ	Rv0678_M139I	Rv0678	139	-1.5383	2.41418	-0.637195	0.523998	1	3.19349	-6.27009	0.750449	FALSE	2.21284
CFZ	Rv1979c_R481R	Rv1979c	481	-1.57501	1.51608	-1.03887	0.298864	2	1.3965	-4.54653	0.694931	FALSE	2.21284
CFZ	mmpL5_V846I	mmpL5	846	-1.57589	1.48557	-1.0608	0.288779	1	1.33581	-4.4876	0.691614	FALSE	2.21284
CFZ	mmpS5_R29L	mmpS5	29	-1.57589	1.08323	-1.4548	0.145723	2	0.547244	-3.69903	0.537423	FALSE	2.21284
CFZ	Rv0678_P130P	Rv0678	130	-1.57589	1.05095	-1.4995	0.133744	2	0.483959	-3.63575	0.526959	FALSE	2.21284
CFZ	Rv1979c_1303_indel	Rv1979c	1303	-1.57589	1.48557	-1.0608	0.288779	4	1.33581	-4.4876	0.691614	TRUE	2.21284
CFZ	Rv3249c_Y74H	Rv3249c	74	-1.57652	1.26328	-1.24796	0.212045	2	0.899502	-4.05255	0.610432	FALSE	2.21284
CFZ	Rv1979c_G214S	Rv1979c	214	-1.57803	2.24428	-0.703136	0.481971	1	2.82075	-5.97681	0.726782	FALSE	2.21284
CFZ	Rv1979c_P478Q	Rv1979c	478	-1.58234	1.23976	-1.27632	0.201841	3	0.847594	-4.01227	0.605522	FALSE	2.21284
CFZ	Rv1979c_631_indel	Rv1979c	631	-1.59687	1.69024	-0.944763	0.34478	7	1.71599	-4.90974	0.712143	FALSE	2.21284
CFZ	Rv3249c_L131L	Rv3249c	131	-1.59734	1.06862	-1.49477	0.134975	2	0.49716	-3.69185	0.526959	TRUE	2.21284
CFZ	mmpL5_C597C	mmpL5	597	-1.61268	1.23878	-1.30183	0.192975	2	0.815332	-4.0407	0.594806	TRUE	2.21284
CFZ	mmpL5_395_indel	mmpL5	395	-1.63397	0.539217	-3.03026	0.0024435	10	-0.577101	-2.69083	0.0331618	TRUE	2.21284
CFZ	pepQ_R170W	pepQ	170	-1.65586	2.42119	-0.683903	0.494036	1	3.08967	-6.40138	0.730833	FALSE	2.21284
CFZ	mmpS5_Y58Y	mmpS5	58	-1.7126	1.56849	-1.09188	0.274888	2	1.36164	-4.78684	0.675606	TRUE	2.21284
CFZ	6.lineage	LINEAGE	5	-1.74905	0.899696	-1.94404	0.0518904	0	0.0143576	-3.51245	0.327531	FALSE	2.21284
CFZ	mmpL5_851_indel	mmpL5	851	-1.7492	1.6199	-1.07982	0.280223	2	1.42581	-4.9242	0.682595	FALSE	2.21284
CFZ	mmpL5_1405_indel	mmpL5	1405	-1.76323	0.910748	-1.93603	0.0528647	3	0.0218357	-3.5483	0.327531	FALSE	2.21284
CFZ	mmpS5_T4I	mmpS5	4	-1.76906	1.14838	-1.54048	0.123443	2	0.48177	-4.01988	0.509083	TRUE	2.21284
CFZ	pepQ_L265L:mmpL5_W936R	pepQ	265	-1.77655	1.48653	-1.1951	0.23205	1	1.13706	-4.69015	0.635905	FALSE	2.21284
CFZ	mmpL5_I282L	mmpL5	282	-1.77869	2.2447	-0.792394	0.428131	1	2.62093	-6.1783	0.712143	FALSE	2.21284
CFZ	mmpL5_L329R	mmpL5	329	-1.77869	2.2447	-0.792394	0.428131	1	2.62093	-6.1783	0.712143	FALSE	2.21284
CFZ	Rv1979c_A298S	Rv1979c	298	-1.77869	1.58791	-1.12014	0.262652	2	1.33361	-4.89099	0.671343	FALSE	2.21284
CFZ	mmpL5_I215V	mmpL5	215	-1.78018	2.24459	-0.793097	0.427721	1	2.61922	-6.17958	0.712143	FALSE	2.21284
CFZ	mmpL5_D424N	mmpL5	424	-1.78018	1.3357	-1.33277	0.182608	3	0.83779	-4.39815	0.571903	FALSE	2.21284
CFZ	mmpL5_T10A	mmpL5	10	-1.84716	1.58754	-1.16353	0.244613	2	1.26442	-4.95874	0.645505	FALSE	2.21284
CFZ	mmpL5_P180L	mmpL5	180	-1.84716	2.24444	-0.822993	0.410512	1	2.55195	-6.24626	0.712143	FALSE	2.21284
CFZ	pepQ_L33L	pepQ	33	-1.84716	2.24444	-0.822993	0.410512	1	2.55195	-6.24626	0.712143	FALSE	2.21284
CFZ	Rv0678_M17V	Rv0678	17	-1.84716	2.24444	-0.822993	0.410512	1	2.55195	-6.24626	0.712143	FALSE	2.21284
CFZ	Rv1979c_S219A	Rv1979c	219	-1.84716	1.58754	-1.16353	0.244613	2	1.26442	-4.95874	0.645505	FALSE	2.21284
CFZ	mmpL5_2754_indel	mmpL5	2754	-1.84832	1.24405	-1.48572	0.137352	3	0.590022	-4.28665	0.528991	FALSE	2.21284
CFZ	mmpL5_S782A	mmpL5	782	-1.86031	2.25135	-0.826307	0.40863	1	2.55234	-6.27295	0.712143	FALSE	2.21284
CFZ	mmpL5_W938R	mmpL5	938	-1.95866	2.4429	-0.801779	0.422681	1	2.82941	-6.74674	0.712143	FALSE	2.21284
CFZ	mmpS5_N102N	mmpS5	102	-2.01355	2.27007	-0.886995	0.375082	1	2.4358	-6.46289	0.712143	FALSE	2.21284
CFZ	mmpL5_S894!	mmpL5	894	-2.0345	1.17277	-1.73478	0.08278	4	0.264132	-4.33313	0.454208	FALSE	2.21284
CFZ	pepQ_L252L	pepQ	252	-2.0345	2.24426	-0.906533	0.364654	1	2.36426	-6.43325	0.712143	FALSE	2.21284
CFZ	Rv1979c_A158T:Rv0678_V149V	Rv1979c	158	-2.0345	1.61135	-1.2626	0.206733	2	1.12376	-5.19275	0.606339	FALSE	2.21284
CFZ	mmpL5_A896T	mmpL5	896	-2.07803	1.48565	-1.39873	0.161893	1	0.833846	-4.98991	0.550081	FALSE	2.21284
CFZ	mmpL5_2208_indel	mmpL5	2208	-2.07803	1.48565	-1.39873	0.161893	1	0.833846	-4.98991	0.550081	FALSE	2.21284
CFZ	Rv1979c_A378T	Rv1979c	378	-2.09902	1.62399	-1.29251	0.196182	2	1.084	-5.28205	0.594806	FALSE	2.21284
CFZ	mmpL5_M903I	mmpL5	903	-2.27076	1.22886	-1.84786	0.0646231	2	0.137808	-4.67932	0.375869	FALSE	2.21284
CFZ	Rv1979c_Y434C	Rv1979c	434	-2.27869	1.48857	-1.53079	0.125821	3	0.638902	-5.19628	0.509083	FALSE	2.21284
CFZ	mmpL5_1000_indel	mmpL5	1000	-2.28018	1.48613	-1.53431	0.124954	1	0.632631	-5.19299	0.509083	FALSE	2.21284
CFZ	Rv3249c_E185E	Rv3249c	185	-2.4328	1.14418	-2.12624	0.0334835	5	-0.190206	-4.6754	0.251126	FALSE	2.21284
KAN	whiB6_4_indel	whiB6	4	-1.69228	0.545556	-3.10194	0.0019225	2	-0.622994	-2.76157	0.0258607	FALSE	1.38271
CFZ	Rv0678_211_indel	Rv0678	211	-3.33318	2.4504	-1.36026	0.173748	1	1.4696	-8.13597	0.571903	FALSE	2.21284
CFZ	_cons	DRUG	16	-4.21284	0.055314	-76.1624	0	0	-4.10443	-4.32126	0	FALSE	2.21284
DLM	ddn_W139!	ddn	139	9.20668	1.99626	4.61197	3.99e-06	1	13.1193	5.29402	4.883e-05	FALSE	4.11759
DLM	ddn_W88!	ddn	88	9.15034	1.42944	6.40135	1.54e-10	2	11.952	6.34864	3.598e-09	FALSE	4.11759
DLM	ddn_91_indel	ddn	91	9.015	1.9853	4.54088	5.6e-06	2	12.9062	5.12382	6.54182e-05	FALSE	4.11759
DLM	ddn_362_indel	ddn	362	8.67649	1.12325	7.72446	1.13e-14	2	10.8781	6.47492	4.14871e-13	FALSE	4.11759
DLM	fbiA_G248G	fbiA	248	8.67649	1.54767	5.60617	2.07e-08	1	11.7099	5.64306	3.5466e-07	FALSE	4.11759
DLM	ddn_W20!	ddn	20	8.54096	1.07987	7.90926	2.66e-15	2	10.6575	6.42442	1.13937e-13	TRUE	4.11759
DLM	fbiA_R321S	fbiA	321	8.19897	1.43562	5.71111	1.12e-08	2	11.0128	5.38516	2.056e-07	FALSE	4.11759
DLM	fbiA_H183Q	fbiA	183	7.83142	1.5478	5.0597	4.2e-07	1	10.8651	4.79772	6.34941e-06	FALSE	4.11759
DLM	ddn_L49P	ddn	49	7.39201	0.636208	11.6189	0	6	8.63898	6.14504	0	FALSE	4.11759
DLM	ddn_Y65S	ddn	65	5.3388	0.750891	7.10996	1.16e-12	3	6.81055	3.86706	3.7265e-11	FALSE	4.11759
DLM	fbiA_G71G	fbiA	71	4.32494	0.908456	4.76075	1.93e-06	2	6.10551	2.54436	2.48005e-05	FALSE	4.11759
DLM	fbiC_A594S	fbiC	594	4.23335	0.872488	4.85204	1.22e-06	2	5.94342	2.52327	1.74189e-05	FALSE	4.11759
DLM	ddn_P45L	ddn	45	3.91937	0.869981	4.50512	6.63e-06	2	5.62453	2.2142	7.09962e-05	FALSE	4.11759
DLM	ddn_6_indel	ddn	6	3.90786	1.2083	3.23419	0.0012199	1	6.27613	1.5396	0.0108871	FALSE	4.11759
DLM	ddn_G34E:Rv3249c_G206S	ddn	34	3.64668	0.663976	5.49219	3.97e-08	4	4.94807	2.34529	6.37681e-07	FALSE	4.11759
DLM	ddn_G34R	ddn	34	3.63926	0.610831	5.95787	2.56e-09	4	4.83649	2.44203	5.06092e-08	TRUE	4.11759
DLM	fbiA_S35A	fbiA	35	3.28846	0.690553	4.76207	1.92e-06	3	4.64195	1.93498	2.48005e-05	FALSE	4.11759
DLM	fbiA_S184T	fbiA	184	3.18001	0.848507	3.74777	0.0001784	2	4.84308	1.51694	0.00176342	FALSE	4.11759
DLM	Rv2983_R57L	Rv2983	57	2.79595	1.16059	2.40908	0.0159929	1	5.0707	0.521196	0.124551	FALSE	4.11759
DLM	fbiA_g-75c	fbiA	-75	2.741	0.848037	3.23217	0.0012285	2	4.40315	1.07885	0.0108871	FALSE	4.11759
DLM	fbiC_T663N	fbiC	663	2.12358	1.152	1.84339	0.0652728	1	4.3815	-0.13434	0.453381	FALSE	4.11759
DLM	Rv3249c_F153F	Rv3249c	153	2.10302	0.871059	2.41432	0.0157647	2	3.81029	0.395739	0.124551	FALSE	4.11759
DLM	fbiC_D168E	fbiC	168	2.04255	1.17996	1.73103	0.0834471	1	4.35527	-0.27018	0.549895	FALSE	4.11759
DLM	fbiC_T829T	fbiC	829	1.91937	1.17935	1.62748	0.103635	1	4.23089	-0.392157	0.605325	FALSE	4.11759
DLM	fbiB_P270P	fbiB	270	1.77142	1.18088	1.50008	0.133595	1	4.08595	-0.543119	0.737958	FALSE	4.11759
DLM	fbiC_L114R	fbiC	114	1.77142	0.872061	2.0313	0.0422249	2	3.48066	0.0621757	0.310051	FALSE	4.11759
DLM	Rv2983_c-1a	Rv2983	-1	1.73448	1.18588	1.46262	0.143572	1	4.0588	-0.589831	0.737958	FALSE	4.11759
DLM	Rv3249c_A17A	Rv3249c	17	1.64481	0.595775	2.7608	0.005766	5	2.81253	0.477096	0.047802	TRUE	4.11759
DLM	4.siteid	SITEID	8	1.44149	0.0942516	15.2941	0	0	1.62623	1.25676	0	FALSE	4.11759
DLM	fgd1_E22E:fbiB_V416I	fgd1	22	1.32467	1.31925	1.0041	0.315328	1	3.9104	-1.26107	0.914885	FALSE	4.11759
DLM	Rv3249c_A186S	Rv3249c	186	1.30694	1.18046	1.10715	0.26823	1	3.62063	-1.00675	0.876651	FALSE	4.11759
DLM	og2mic)	DRUG	18	1.1814	0.0306493	38.5457	0	0	1.24147	1.12133	0	FALSE	4.11759
DLM	fbiC_S172C	fbiC	172	1.15335	0.949895	1.21418	0.224678	2	3.01514	-0.708447	0.876651	FALSE	4.11759
DLM	fbiC_G445G:fbiB_R157R	fbiC	445	1.11057	0.650263	1.70788	0.087659	5	2.38509	-0.163945	0.563209	FALSE	4.11759
DLM	fbiA_A199T	fbiA	199	1.10302	1.18079	0.934135	0.350234	1	3.41736	-1.21133	0.920129	FALSE	4.11759
DLM	fbiA_L22V	fbiA	22	1.03859	0.722668	1.43716	0.150673	3	2.45502	-0.377841	0.759274	FALSE	4.11759
DLM	fbiC_A524A	fbiC	524	1.03216	0.890144	1.15955	0.246233	2	2.77685	-0.712519	0.876651	FALSE	4.11759
DLM	ddn_P2P	ddn	2	1.00097	0.719506	1.39118	0.16417	3	2.4112	-0.409267	0.767122	FALSE	4.11759
DLM	fbiC_T381T	fbiC	381	0.999652	0.75935	1.31646	0.188021	3	2.48798	-0.488674	0.86288	FALSE	4.11759
DLM	fbiB_L444F	fbiB	444	0.964367	1.17281	0.822267	0.410925	1	3.26308	-1.33435	0.930809	FALSE	4.11759
DLM	fbiC_D511D	fbiC	511	0.951316	0.907839	1.04789	0.294689	2	2.73068	-0.828048	0.901608	FALSE	4.11759
DLM	Rv2983_A168A	Rv2983	168	0.910935	0.95103	0.957841	0.338143	2	2.77495	-0.953084	0.914885	FALSE	4.11759
DLM	ddn_R54R	ddn	54	0.905506	0.829739	1.09132	0.275134	2	2.53179	-0.720782	0.876651	FALSE	4.11759
DLM	ddn_a-99c	ddn	-99	0.82065	0.753808	1.08867	0.276299	4	2.29811	-0.656814	0.876651	FALSE	4.11759
DLM	fbiC_D313D	fbiC	313	0.808155	0.821063	0.984279	0.324978	2	2.41744	-0.801128	0.914885	FALSE	4.11759
DLM	fbiB_L121L	fbiB	121	0.762534	0.892568	0.854316	0.39293	2	2.51197	-0.986898	0.930809	TRUE	4.11759
DLM	fbiC_A620T	fbiC	620	0.70665	0.950722	0.743278	0.457314	2	2.57007	-1.15677	0.930809	FALSE	4.11759
DLM	fbiC_V581L	fbiC	581	0.672628	0.724127	0.928882	0.35295	3	2.09192	-0.746661	0.920129	FALSE	4.11759
DLM	fbiC_G77G	fbiC	77	0.652597	0.91786	0.710999	0.477085	2	2.4516	-1.14641	0.930809	FALSE	4.11759
DLM	fbiC_G522R	fbiC	522	0.624151	0.976905	0.638907	0.522884	2	2.53889	-1.29058	0.930809	FALSE	4.11759
DLM	Rv3249c_P10L	Rv3249c	10	0.618084	2.49173	0.248054	0.804093	1	5.50188	-4.26571	0.969097	FALSE	4.11759
DLM	fbiC_A333V	fbiC	333	0.61745	0.558232	1.10608	0.268691	5	1.71158	-0.476684	0.876651	TRUE	4.11759
DLM	6.siteid	SITEID	10	0.57394	0.0917245	6.25722	3.92e-10	0	0.753721	0.39416	8.39533e-09	FALSE	4.11759
DLM	20.siteid	SITEID	15	0.569576	0.125888	4.52446	6.06e-06	0	0.816317	0.322835	6.77139e-05	FALSE	4.11759
DLM	fbiB_A82T	fbiB	82	0.553872	0.923982	0.599441	0.548879	2	2.36488	-1.25713	0.930809	FALSE	4.11759
DLM	fgd1_A35V	fgd1	35	0.54715	0.669947	0.816707	0.414096	4	1.86025	-0.765945	0.930809	FALSE	4.11759
DLM	Rv3249c_S89!	Rv3249c	89	0.541631	0.326285	1.66	0.0969155	35	1.18115	-0.0978873	0.593031	FALSE	4.11759
DLM	fbiA_I156I	fbiA	156	0.5241	0.926052	0.565951	0.571427	2	2.33916	-1.29096	0.930809	FALSE	4.11759
DLM	fbiC_2546_indel	fbiC	2546	0.508963	0.921742	0.552175	0.580828	2	2.31558	-1.29765	0.930809	TRUE	4.11759
DLM	fbiA_R279R	fbiA	279	0.508259	0.833154	0.610042	0.541834	3	2.14124	-1.12472	0.930809	FALSE	4.11759
DLM	Rv2983_P91S	Rv2983	91	0.503164	1.12992	0.44531	0.656096	2	2.7178	-1.71148	0.942482	FALSE	4.11759
DLM	fbiC_A11V	fbiC	11	0.404363	0.731781	0.552574	0.580555	3	1.83865	-1.02993	0.930809	FALSE	4.11759
DLM	fbiC_A524G:Rv3249c_E185E	fbiC	524	0.389732	2.06711	0.188539	0.850454	5	4.44127	-3.66181	0.984534	FALSE	4.11759
DLM	fbiA_L113L	fbiA	113	0.387601	0.261288	1.48342	0.137962	47	0.899724	-0.124523	0.737958	TRUE	4.11759
DLM	ddn_A120S:ddn_R72Q	ddn	120	0.35194	0.867057	0.405901	0.684815	2	2.05137	-1.34749	0.942482	FALSE	4.11759
DLM	fbiA_A43T	fbiA	43	0.342104	0.975398	0.350732	0.725789	2	2.25388	-1.56968	0.958429	TRUE	4.11759
DLM	fbiC_S762N:fbiA_A43A	fbiC	762	0.333104	1.12428	0.296282	0.767015	2	2.53669	-1.87049	0.966288	FALSE	4.11759
DLM	fbiB_T374K	fbiB	374	0.330688	0.827523	0.399612	0.689442	3	1.95263	-1.29126	0.942482	FALSE	4.11759
DLM	14.siteid	SITEID	14	0.326602	0.140076	2.3316	0.0197219	0	0.601152	0.0520519	0.149074	FALSE	4.11759
DLM	fbiB_D66E	fbiB	66	0.320065	0.739094	0.43305	0.664978	4	1.76869	-1.12856	0.942482	FALSE	4.11759
DLM	fbiC_T273A	fbiC	273	0.313365	0.450467	0.695646	0.486651	13	1.19628	-0.56955	0.930809	TRUE	4.11759
DLM	10.siteid	SITEID	12	0.309547	0.0967288	3.20015	0.0013736	0	0.499135	0.119958	0.0117672	FALSE	4.11759
DLM	Rv2983_A21T	Rv2983	21	0.290858	1.18631	0.245179	0.806318	1	2.61602	-2.0343	0.969097	FALSE	4.11759
DLM	fgd1_G168G	fgd1	168	0.258498	0.672779	0.384224	0.700812	7	1.57715	-1.06015	0.945569	FALSE	4.11759
DLM	fbiA_a-97t	fbiA	-97	0.245842	0.713382	0.344615	0.730384	7	1.64407	-1.15239	0.958429	FALSE	4.11759
DLM	ddn_g-89c	ddn	-89	0.216035	0.91558	0.235954	0.813468	7	2.01057	-1.5785	0.969097	FALSE	4.11759
DLM	fbiC_W678G	fbiC	678	0.205439	0.748358	0.27452	0.783685	16	1.67222	-1.26134	0.969097	FALSE	4.11759
DLM	fbiA_V188F	fbiA	188	0.177579	1.96088	0.0905608	0.927841	1	4.02091	-3.66575	0.988857	FALSE	4.11759
DLM	fgd1_A51A	fgd1	51	0.174993	0.836307	0.209245	0.834257	2	1.81416	-1.46417	0.974394	FALSE	4.11759
DLM	fbiA_I284I	fbiA	284	0.148015	0.867508	0.170621	0.864522	2	1.84833	-1.5523	0.987144	FALSE	4.11759
DLM	fgd1_R64S	fgd1	64	0.144123	0.342103	0.421287	0.673545	166	0.814645	-0.526398	0.942482	TRUE	4.11759
DLM	ns[cluster100])	DRUG	17	0.120277	0.0280441	4.28887	1.8e-05	0	0.175244	0.0653111	0.00018504	FALSE	4.11759
DLM	fgd1_Y184Y	fgd1	184	0.113606	1.00896	0.112598	0.91035	2	2.09117	-1.86396	0.988857	FALSE	4.11759
DLM	Rv3249c_R204R	Rv3249c	204	0.106899	0.337018	0.317192	0.751098	202	0.767454	-0.553655	0.958429	TRUE	4.11759
DLM	fbiC_D375N	fbiC	375	0.101048	0.655893	0.154063	0.87756	6	1.3866	-1.1845	0.987144	FALSE	4.11759
DLM	fbiA_R177H	fbiA	177	0.0919097	1.1767	0.0781082	0.937742	1	2.39824	-2.21442	0.988857	FALSE	4.11759
DLM	fbiA_H295R	fbiA	295	0.0919097	1.1767	0.0781082	0.937742	1	2.39824	-2.21442	0.988857	FALSE	4.11759
DLM	fbiC_g-11a	fbiC	-11	0.0840681	0.260993	0.322109	0.74737	70	0.595614	-0.427478	0.958429	FALSE	4.11759
DLM	fbiC_T560T	fbiC	560	0.0699343	0.646303	0.108207	0.913832	4	1.33669	-1.19682	0.988857	TRUE	4.11759
DLM	fbiC_G166G	fbiC	166	0.0677517	0.730414	0.0927579	0.926096	4	1.49936	-1.36386	0.988857	TRUE	4.11759
DLM	fbiC_A132A	fbiC	132	0.0526023	0.396601	0.132633	0.894484	20	0.829941	-0.724736	0.988857	TRUE	4.11759
DLM	fbiA_V5V:Rv2983_E100E	fbiA	5	0.0501305	0.280822	0.178513	0.85832	41	0.600541	-0.50028	0.987144	TRUE	4.11759
DLM	fbiA_P144P:Rv3249c_463_indel	fbiA	144	0.0498516	0.667582	0.0746749	0.940473	5	1.35831	-1.25861	0.988857	FALSE	4.11759
DLM	fgd1_V37G	fgd1	37	0.0407392	1.38459	0.0294232	0.976527	2	2.75454	-2.67306	0.988857	FALSE	4.11759
DLM	fgd1_Q258Q	fgd1	258	0.0382009	0.327451	0.116661	0.907128	27	0.680005	-0.603603	0.988857	FALSE	4.11759
DLM	fbiC_-14_indel	fbiC	-14	0.0243333	0.62616	0.0388612	0.969001	9	1.25161	-1.20294	0.988857	FALSE	4.11759
DLM	fbiB_P213P	fbiB	213	0.0183011	0.601963	0.0304023	0.975746	6	1.19815	-1.16155	0.988857	FALSE	4.11759
DLM	fgd1_Y155Y	fgd1	155	0.0177194	0.357298	0.0495929	0.960447	25	0.718023	-0.682585	0.988857	TRUE	4.11759
DLM	ddn_T56T	ddn	56	-0.0059203	0.599901	-0.0098687	0.992126	6	1.16989	-1.18173	0.992126	FALSE	4.11759
DLM	fbiC_G471G	fbiC	471	-0.0111959	0.474156	-0.0236123	0.981162	20	0.91815	-0.940542	0.988857	FALSE	4.11759
DLM	fbiB_R365R	fbiB	365	-0.0114239	0.926594	-0.0123289	0.990163	2	1.8047	-1.82755	0.992126	FALSE	4.11759
DLM	ddn_c-24a	ddn	-24	-0.0240377	0.888585	-0.0270517	0.978418	2	1.71759	-1.76566	0.988857	FALSE	4.11759
DLM	fgd1_R45C	fgd1	45	-0.0339779	0.628685	-0.054046	0.956898	7	1.19824	-1.2662	0.988857	FALSE	4.11759
DLM	fgd1_M93T	fgd1	93	-0.0353872	0.556217	-0.0636213	0.949272	9	1.0548	-1.12557	0.988857	TRUE	4.11759
DLM	1.lineage	LINEAGE	1	-0.036029	0.114034	-0.31595	0.752041	0	0.187477	-0.259535	0.958429	FALSE	4.11759
DLM	Rv2983_I59L	Rv2983	59	-0.0376299	0.625988	-0.0601128	0.952066	7	1.18931	-1.26457	0.988857	FALSE	4.11759
DLM	fbiA_Q120R	fbiA	120	-0.0406725	0.933967	-0.0435482	0.965265	2	1.7899	-1.87125	0.988857	FALSE	4.11759
DLM	fbiC_P750P	fbiC	750	-0.0563334	0.848768	-0.0663708	0.947083	3	1.60725	-1.71992	0.988857	FALSE	4.11759
DLM	fbiB_K448R	fbiB	448	-0.0590604	0.222343	-0.265627	0.790526	75	0.376733	-0.494854	0.969097	FALSE	4.11759
DLM	2.lineage	LINEAGE	2	-0.0604693	0.0615217	-0.982893	0.32566	0	0.0601132	-0.181052	0.914885	FALSE	4.11759
DLM	fbiA_A190T	fbiA	190	-0.0606854	1.27037	-0.04777	0.9619	2	2.42923	-2.5506	0.988857	FALSE	4.11759
DLM	fbiB_T374T	fbiB	374	-0.0633546	1.10178	-0.0575021	0.954145	2	2.09613	-2.22284	0.988857	FALSE	4.11759
DLM	fbiB_A31T:Rv3249c_A165V	fbiB	31	-0.0956399	0.406007	-0.235562	0.813772	54	0.700133	-0.891413	0.969097	FALSE	4.11759
DLM	fbiB_G325S	fbiB	325	-0.124606	1.39827	-0.0891141	0.928991	2	2.61601	-2.86523	0.988857	FALSE	4.11759
DLM	fbiA_T302M	fbiA	302	-0.128019	0.226474	-0.565272	0.571888	55	0.315869	-0.571908	0.930809	FALSE	4.11759
DLM	fgd1_T65T	fgd1	65	-0.137652	1.13239	-0.121558	0.903249	1	2.08184	-2.35714	0.988857	FALSE	4.11759
DLM	fgd1_G152G	fgd1	152	-0.14255	0.941053	-0.15148	0.879597	2	1.70191	-1.98701	0.987144	TRUE	4.11759
DLM	fbiC_L323L	fbiC	323	-0.158712	0.415883	-0.381627	0.702738	43	0.656419	-0.973843	0.945569	FALSE	4.11759
DLM	fbiA_R304R	fbiA	304	-0.186722	0.580914	-0.321428	0.747886	10	0.95187	-1.32531	0.958429	FALSE	4.11759
DLM	Rv2983_A72A	Rv2983	72	-0.189025	0.53359	-0.354251	0.723151	11	0.856812	-1.23486	0.958429	FALSE	4.11759
DLM	fbiB_Q339R	fbiB	339	-0.190527	1.3995	-0.13614	0.891711	2	2.55249	-2.93355	0.988857	FALSE	4.11759
DLM	fgd1_V170M	fgd1	170	-0.19335	0.196455	-0.984192	0.325021	177	0.191703	-0.578402	0.914885	FALSE	4.11759
DLM	Rv3249c_T154A	Rv3249c	154	-0.203312	0.17711	-1.14794	0.250991	138	0.143823	-0.550447	0.876651	FALSE	4.11759
DLM	fbiC_g-33a	fbiC	-33	-0.21056	1.01397	-0.207659	0.835495	2	1.77683	-2.19795	0.974394	TRUE	4.11759
DLM	fgd1_R45R	fgd1	45	-0.22729	1.55026	-0.146614	0.883436	1	2.81122	-3.2658	0.987144	FALSE	4.11759
DLM	fgd1_V222V	fgd1	222	-0.22729	1.55026	-0.146614	0.883436	1	2.81122	-3.2658	0.987144	FALSE	4.11759
DLM	Rv3249c_625_indel	Rv3249c	625	-0.229441	1.12154	-0.204577	0.837903	2	1.96878	-2.42766	0.974394	FALSE	4.11759
DLM	fbiC_D313G:Rv3249c_V83M	fbiC	313	-0.235756	0.995489	-0.236824	0.812793	3	1.7154	-2.18691	0.969097	FALSE	4.11759
DLM	fbiA_A281A	fbiA	281	-0.263319	1.12226	-0.234632	0.814494	2	1.93632	-2.46296	0.969097	FALSE	4.11759
DLM	fgd1_A2V	fgd1	2	-0.263319	1.54695	-0.170218	0.864839	1	2.76871	-3.29535	0.987144	FALSE	4.11759
DLM	Rv2983_L125I	Rv2983	125	-0.263319	1.12226	-0.234632	0.814494	2	1.93632	-2.46296	0.969097	FALSE	4.11759
DLM	fbiB_L447R	fbiB	447	-0.2704	0.495429	-0.545791	0.58521	16	0.70064	-1.24144	0.930809	FALSE	4.11759
DLM	fbiC_L55L	fbiC	55	-0.274067	0.57603	-0.475787	0.634226	24	0.854951	-1.40309	0.942482	FALSE	4.11759
DLM	Rv3249c_V210V	Rv3249c	210	-0.290109	1.94599	-0.149081	0.88149	6	3.52402	-4.10424	0.987144	TRUE	4.11759
DLM	fbiC_L515L	fbiC	515	-0.295577	1.39369	-0.212082	0.832043	2	2.43606	-3.02721	0.974394	FALSE	4.11759
DLM	5.siteid	SITEID	9	-0.302881	0.0890237	-3.40225	0.0006683	0	-0.128394	-0.477367	0.00636123	FALSE	4.11759
DLM	fgd1_T255A	fgd1	255	-0.312238	0.99354	-0.314268	0.753317	3	1.6351	-2.25958	0.958429	FALSE	4.11759
DLM	fbiC_D616G	fbiC	616	-0.319661	0.770659	-0.414789	0.678296	4	1.19083	-1.83015	0.942482	FALSE	4.11759
DLM	fbiB_E191E	fbiB	191	-0.335284	0.537512	-0.623772	0.532778	10	0.718238	-1.38881	0.930809	TRUE	4.11759
DLM	fbiB_T92T	fbiB	92	-0.339504	0.598109	-0.56763	0.570286	8	0.832788	-1.5118	0.930809	FALSE	4.11759
DLM	fbiC_A505T	fbiC	505	-0.34385	0.341294	-1.00749	0.3137	33	0.325087	-1.01279	0.914885	TRUE	4.11759
DLM	fbiA_D205D	fbiA	205	-0.347808	0.840753	-0.413687	0.679103	3	1.30007	-1.99568	0.942482	FALSE	4.11759
DLM	fgd1_R187H	fgd1	187	-0.351286	0.955489	-0.36765	0.713134	2	1.52147	-2.22404	0.954559	FALSE	4.11759
DLM	ddn_g-26t	ddn	-26	-0.353233	0.721765	-0.489402	0.624557	5	1.06143	-1.76789	0.942482	FALSE	4.11759
DLM	fbiA_g-81a	fbiA	-81	-0.360405	1.36281	-0.264458	0.791427	2	2.3107	-3.03151	0.969097	TRUE	4.11759
DLM	fbiA_G264R	fbiA	264	-0.367075	0.513658	-0.714628	0.474839	17	0.639696	-1.37384	0.930809	FALSE	4.11759
DLM	fbiC_K8K	fbiC	8	-0.391626	0.48287	-0.811038	0.417344	34	0.554799	-1.33805	0.930809	FALSE	4.11759
DLM	fbiC_K397K	fbiC	397	-0.400069	1.94762	-0.205414	0.837249	1	3.41727	-4.21741	0.974394	FALSE	4.11759
DLM	Rv3249c_L36L	Rv3249c	36	-0.400069	1.40309	-0.285135	0.775541	2	2.34999	-3.15012	0.969097	FALSE	4.11759
DLM	fbiB_V348I	fbiB	348	-0.403265	1.03821	-0.388425	0.697702	3	1.63162	-2.43815	0.945569	TRUE	4.11759
DLM	fbiC_A208A	fbiC	208	-0.404535	1.22702	-0.329688	0.741635	2	2.00043	-2.8095	0.958429	FALSE	4.11759
DLM	fgd1_H315D	fgd1	315	-0.429798	1.39662	-0.30774	0.75828	2	2.30759	-3.16718	0.95999	FALSE	4.11759
DLM	6.lineage	LINEAGE	5	-0.445157	1.06234	-0.419032	0.675192	0	1.63704	-2.52735	0.942482	FALSE	4.11759
DLM	fbiA_A206T	fbiA	206	-0.464857	0.967568	-0.480439	0.630915	3	1.43158	-2.36129	0.942482	FALSE	4.11759
DLM	Rv2983_c-4t	Rv2983	-4	-0.468775	1.39612	-0.33577	0.737044	2	2.26762	-3.20517	0.958429	FALSE	4.11759
DLM	fbiB_R265Q	fbiB	265	-0.470773	0.990718	-0.475184	0.634656	3	1.47103	-2.41258	0.942482	FALSE	4.11759
DLM	Rv2983_A20V	Rv2983	20	-0.470773	0.990718	-0.475184	0.634656	3	1.47103	-2.41258	0.942482	FALSE	4.11759
DLM	fbiC_G508S	fbiC	508	-0.475356	0.78323	-0.606917	0.543906	3	1.05977	-2.01049	0.930809	FALSE	4.11759
DLM	fbiC_A591A	fbiC	591	-0.488291	0.69728	-0.700279	0.483753	7	0.878378	-1.85496	0.930809	FALSE	4.11759
DLM	fbiB_D90N	fbiB	90	-0.502711	1.09884	-0.457492	0.647318	2	1.65102	-2.65644	0.942482	FALSE	4.11759
DLM	fbiA_V306M:ddn_!80_indel	fbiA	306	-0.531242	0.991767	-0.535653	0.592199	3	1.41262	-2.47511	0.930809	FALSE	4.11759
DLM	fbiB_K206N	fbiB	206	-0.535633	1.9436	-0.275589	0.782864	1	3.27382	-4.34508	0.969097	FALSE	4.11759
DLM	fbiB_T212T	fbiB	212	-0.535875	1.26545	-0.423467	0.671954	2	1.9444	-3.01615	0.942482	FALSE	4.11759
DLM	Rv3249c_T136I	Rv3249c	136	-0.535875	1.26545	-0.423467	0.671954	2	1.9444	-3.01615	0.942482	FALSE	4.11759
DLM	ddn_R30S	ddn	30	-0.541733	0.744758	-0.727395	0.466984	5	0.917993	-2.00146	0.930809	FALSE	4.11759
DLM	fbiC_E299V	fbiC	299	-0.550027	1.1202	-0.491007	0.623422	2	1.64557	-2.74562	0.942482	FALSE	4.11759
DLM	fgd1_A281A	fgd1	281	-0.569305	1.01796	-0.559263	0.575982	3	1.42589	-2.5645	0.930809	TRUE	4.11759
DLM	3.lineage	LINEAGE	3	-0.596423	0.0865247	-6.89309	5.46e-12	0	-0.426835	-0.766011	1.40322e-10	FALSE	4.11759
DLM	fbiB_R334Q	fbiB	334	-0.60435	1.03911	-0.581604	0.560834	3	1.43231	-2.64101	0.930809	TRUE	4.11759
DLM	fbiC_c-4t	fbiC	-4	-0.638946	0.855165	-0.74716	0.454967	3	1.03718	-2.31507	0.930809	TRUE	4.11759
DLM	Rv2983_G74R	Rv2983	74	-0.640075	1.54801	-0.413483	0.679253	1	2.39402	-3.67417	0.942482	FALSE	4.11759
DLM	fbiB_Q69R	fbiB	69	-0.640876	1.17677	-0.544608	0.586023	2	1.66559	-2.94734	0.930809	TRUE	4.11759
DLM	ddn_R23W	ddn	23	-0.648868	0.78184	-0.829925	0.406581	4	0.883538	-2.18127	0.930809	FALSE	4.11759
DLM	8.siteid	SITEID	11	-0.653439	0.0931858	-7.01222	2.35e-12	0	-0.470795	-0.836083	6.71056e-11	FALSE	4.11759
DLM	fbiC_D272G	fbiC	272	-0.70125	1.20732	-0.58083	0.561355	2	1.66511	-3.06761	0.930809	FALSE	4.11759
DLM	Rv3249c_Y74H	Rv3249c	74	-0.716954	1.18613	-0.604446	0.545547	2	1.60787	-3.04178	0.930809	FALSE	4.11759
DLM	fbiC_L39L	fbiC	39	-0.717068	1.20987	-0.592682	0.553394	2	1.65428	-3.08841	0.930809	FALSE	4.11759
DLM	fbiC_G839D	fbiC	839	-0.719391	1.3495	-0.533078	0.593979	2	1.92563	-3.36441	0.930809	TRUE	4.11759
DLM	fbiA_I208V	fbiA	208	-0.722276	0.427192	-1.69075	0.0908847	23	0.115022	-1.55957	0.569692	FALSE	4.11759
DLM	fgd1_N82N	fgd1	82	-0.725338	1.0132	-0.715887	0.474061	3	1.26054	-2.71121	0.930809	TRUE	4.11759
DLM	fbiB_R293G	fbiB	293	-0.735574	1.03617	-0.709896	0.477768	3	1.29532	-2.76647	0.930809	TRUE	4.11759
DLM	fbiC_T545T	fbiC	545	-0.737754	0.731921	-1.00797	0.313469	6	0.696811	-2.17232	0.914885	TRUE	4.11759
DLM	fbiB_R253H	fbiB	253	-0.751526	1.39763	-0.537716	0.590773	2	1.98782	-3.49088	0.930809	FALSE	4.11759
DLM	fbiC_V713L	fbiC	713	-0.751554	1.15928	-0.648296	0.516793	3	1.52063	-3.02374	0.930809	FALSE	4.11759
DLM	fbiA_Q27P	fbiA	27	-0.778045	1.16053	-0.67042	0.50259	3	1.4966	-3.05269	0.930809	FALSE	4.11759
DLM	fbiA_V188I	fbiA	188	-0.778045	0.604949	-1.28613	0.198397	11	0.407656	-1.96375	0.876651	FALSE	4.11759
DLM	fbiB_E81E	fbiB	81	-0.778045	1.37558	-0.565612	0.571657	2	1.91809	-3.47418	0.930809	FALSE	4.11759
DLM	fbiB_D437G	fbiB	437	-0.778045	1.39826	-0.556437	0.577912	2	1.96255	-3.51864	0.930809	FALSE	4.11759
DLM	fbiC_g-15t	fbiC	-15	-0.778045	1.39826	-0.556437	0.577912	2	1.96255	-3.51864	0.930809	FALSE	4.11759
DLM	fbiC_D100E	fbiC	100	-0.778045	0.610228	-1.27501	0.202307	15	0.418003	-1.97409	0.876651	FALSE	4.11759
DLM	Rv2983_R133R	Rv2983	133	-0.778045	0.731544	-1.06357	0.287526	9	0.655782	-2.21187	0.897293	FALSE	4.11759
DLM	Rv3249c_R13Q	Rv3249c	13	-0.778045	1.94415	-0.400198	0.689011	1	3.03249	-4.58858	0.942482	FALSE	4.11759
DLM	fbiA_A222A	fbiA	222	-0.779399	0.813778	-0.957754	0.338187	3	0.815606	-2.3744	0.914885	FALSE	4.11759
DLM	fbiB_R174H:Rv2983_G145R	fbiB	174	-0.783635	0.891869	-0.878643	0.379595	4	0.964429	-2.5317	0.930809	FALSE	4.11759
DLM	ddn_K84K	ddn	84	-0.816032	1.37644	-0.592854	0.553279	4	1.8818	-3.51386	0.930809	FALSE	4.11759
DLM	fbiA_c-66t	fbiA	-66	-0.816032	1.94476	-0.419605	0.674774	1	2.9957	-4.62777	0.942482	FALSE	4.11759
DLM	fbiC_D427H	fbiC	427	-0.816032	1.94476	-0.419605	0.674774	1	2.9957	-4.62777	0.942482	FALSE	4.11759
DLM	fbiA_L289L	fbiA	289	-0.838514	1.12433	-0.745793	0.455793	3	1.36516	-3.04219	0.930809	FALSE	4.11759
DLM	fbiC_c-90t	fbiC	-90	-0.838514	1.94442	-0.431241	0.666293	1	2.97255	-4.64958	0.942482	FALSE	4.11759
DLM	fbiC_K113T	fbiC	113	-0.838514	1.94442	-0.431241	0.666293	1	2.97255	-4.64958	0.942482	FALSE	4.11759
DLM	fbiC_I453V	fbiC	453	-0.838514	1.39864	-0.599521	0.548826	2	1.90282	-3.57985	0.930809	FALSE	4.11759
DLM	fbiC_A754V	fbiC	754	-0.838514	1.37596	-0.609401	0.542258	2	1.85838	-3.5354	0.930809	FALSE	4.11759
DLM	fbiC_G839A	fbiC	839	-0.838514	0.872224	-0.961352	0.336375	5	0.871045	-2.54807	0.914885	FALSE	4.11759
DLM	Rv2983_A32T	Rv2983	32	-0.838514	1.37596	-0.609401	0.542258	2	1.85838	-3.5354	0.930809	FALSE	4.11759
DLM	Rv2983_D78N:Rv2983_G76S	Rv2983	78	-0.838514	1.37596	-0.609401	0.542258	2	1.85838	-3.5354	0.930809	FALSE	4.11759
DLM	Rv2983_Q121H	Rv2983	121	-0.838514	0.738282	-1.13576	0.256055	7	0.608518	-2.28555	0.876651	FALSE	4.11759
DLM	fbiC_a-32g	fbiC	-32	-0.875751	0.622373	-1.40712	0.159393	14	0.344099	-2.0956	0.760756	TRUE	4.11759
DLM	fgd1_A250A	fgd1	250	-0.881404	1.95325	-0.451249	0.65181	2	2.94697	-4.70978	0.942482	TRUE	4.11759
DLM	Rv2983_R169Q	Rv2983	169	-0.893409	1.38792	-0.643705	0.519767	2	1.82691	-3.61373	0.930809	FALSE	4.11759
DLM	fgd1_A182A	fgd1	182	-0.913441	0.743788	-1.22809	0.219412	5	0.544383	-2.37127	0.876651	TRUE	4.11759
DLM	fbiB_V108V	fbiB	108	-0.915873	1.40926	-0.649895	0.51576	2	1.84628	-3.67803	0.930809	FALSE	4.11759
DLM	ddn_R72W	ddn	72	-0.930952	0.818247	-1.13774	0.255229	3	0.672812	-2.53472	0.876651	FALSE	4.11759
DLM	fbiC_I693V	fbiC	693	-0.941365	1.1344	-0.829838	0.40663	3	1.28205	-3.16478	0.930809	FALSE	4.11759
DLM	Rv2983_C187C	Rv2983	187	-0.952719	1.52595	-0.624344	0.532402	1	2.03815	-3.94358	0.930809	FALSE	4.11759
DLM	ddn_D69D	ddn	69	-0.990633	1.54663	-0.640511	0.521841	1	2.04076	-4.02203	0.930809	FALSE	4.11759
DLM	fgd1_G178G	fgd1	178	-0.990633	1.54663	-0.640511	0.521841	1	2.04076	-4.02203	0.930809	FALSE	4.11759
DLM	Rv2983_I13L	Rv2983	13	-0.991703	1.66584	-0.595318	0.551631	1	2.27334	-4.25675	0.930809	FALSE	4.11759
DLM	Rv2983_R171R	Rv2983	171	-0.994704	1.0742	-0.925999	0.354447	2	1.11072	-3.10013	0.920129	FALSE	4.11759
DLM	fbiC_I781V	fbiC	781	-1.02004	1.41437	-0.7212	0.470786	2	1.75212	-3.7922	0.930809	FALSE	4.11759
DLM	3.siteid	SITEID	7	-1.03019	0.0869255	-11.8515	0	0	-0.859821	-1.20057	0	FALSE	4.11759
DLM	fbiC_D272D	fbiC	272	-1.0626	1.09062	-0.974302	0.329906	2	1.07503	-3.20022	0.914885	FALSE	4.11759
DLM	ddn_G70V	ddn	70	-1.07664	1.49792	-0.718759	0.47229	2	1.85928	-4.01257	0.930809	TRUE	4.11759
DLM	fbiB_R218R	fbiB	218	-1.10621	1.39762	-0.791498	0.428653	2	1.63312	-3.84554	0.930809	FALSE	4.11759
DLM	fbiB_L20L	fbiB	20	-1.11563	1.00632	-1.10862	0.267593	3	0.856761	-3.08803	0.876651	TRUE	4.11759
DLM	ddn_E83D	ddn	83	-1.14444	0.922647	-1.24039	0.21483	3	0.663944	-2.95283	0.876651	FALSE	4.11759
DLM	fbiA_Q90H	fbiA	90	-1.14806	1.94427	-0.590485	0.554866	1	2.66271	-4.95883	0.930809	FALSE	4.11759
DLM	fbiC_V65V	fbiC	65	-1.16565	1.39776	-0.833936	0.404317	2	1.57397	-3.90526	0.930809	TRUE	4.11759
DLM	Rv3249c_L131L	Rv3249c	131	-1.17356	1.10861	-1.05859	0.289787	2	0.999314	-3.34644	0.897293	TRUE	4.11759
DLM	fbiC_t-77c	fbiC	-77	-1.22973	1.95837	-0.627937	0.530045	1	2.60868	-5.06814	0.930809	FALSE	4.11759
DLM	11.siteid	SITEID	13	-1.25827	0.783448	-1.60607	0.108259	0	0.277287	-2.79383	0.618277	FALSE	4.11759
DLM	Rv2983_D90N	Rv2983	90	-1.30367	0.91599	-1.42324	0.154666	4	0.491666	-3.09901	0.760756	FALSE	4.11759
DLM	fbiB_T292A	fbiB	292	-1.36769	1.53066	-0.893533	0.371571	1	1.63239	-4.36778	0.930809	FALSE	4.11759
DLM	fgd1_L323F:fbiB_V17A	fgd1	323	-1.40426	1.17492	-1.19519	0.232013	4	0.898595	-3.70711	0.876651	FALSE	4.11759
DLM	fbiC_A507A	fbiC	507	-1.41246	1.94397	-0.726583	0.467482	1	2.39772	-5.22263	0.930809	FALSE	4.11759
DLM	fbiC_L726L	fbiC	726	-1.41246	1.94397	-0.726583	0.467482	1	2.39772	-5.22263	0.930809	FALSE	4.11759
DLM	fgd1_G189G	fgd1	189	-1.41246	1.94397	-0.726583	0.467482	1	2.39772	-5.22263	0.930809	FALSE	4.11759
DLM	Rv2983_Q123Q	Rv2983	123	-1.41246	1.94397	-0.726583	0.467482	1	2.39772	-5.22263	0.930809	FALSE	4.11759
DLM	fbiB_I446T	fbiB	446	-1.44151	1.5277	-0.94358	0.345384	1	1.55279	-4.4358	0.920129	FALSE	4.11759
DLM	fbiB_R91R	fbiB	91	-1.53297	0.875486	-1.751	0.0799463	4	0.182979	-3.24893	0.540689	FALSE	4.11759
DLM	fbiC_M709I	fbiC	709	-1.55499	1.06163	-1.46472	0.142997	3	0.525805	-3.63579	0.737958	FALSE	4.11759
DLM	fgd1_G168R	fgd1	168	-1.60506	1.14191	-1.40558	0.159848	2	0.633095	-3.84321	0.760756	FALSE	4.11759
DLM	fbiC_T687M	fbiC	687	-1.62227	1.35676	-1.19569	0.231817	3	1.03698	-4.28152	0.876651	FALSE	4.11759
DLM	fbiA_G277S	fbiA	277	-1.68358	1.94453	-0.865805	0.386597	1	2.12769	-5.49486	0.930809	FALSE	4.11759
DLM	fbiC_V581V:fbiB_R365G	fbiC	581	-1.68358	1.39879	-1.2036	0.228744	2	1.05804	-4.42521	0.876651	FALSE	4.11759
DLM	fbiC_S634S	fbiC	634	-1.68358	1.37611	-1.22343	0.221166	2	1.0136	-4.38077	0.876651	TRUE	4.11759
DLM	fgd1_A272A:ddn_N91N	fgd1	272	-1.86746	1.5471	-1.20707	0.227406	1	1.16486	-4.89977	0.876651	FALSE	4.11759
DLM	fgd1_K296R	fgd1	296	-1.86746	1.5471	-1.20707	0.227406	1	1.16486	-4.89977	0.876651	FALSE	4.11759
DLM	fbiB_I18T	fbiB	18	-1.87673	1.95619	-0.959378	0.337368	1	1.95741	-5.71086	0.914885	FALSE	4.11759
DLM	fbiC_c-48t	fbiC	-48	-1.91825	1.0282	-1.86565	0.0620907	4	0.0970141	-3.93352	0.443259	FALSE	4.11759
DLM	fbiA_L25L	fbiA	25	-1.9818	1.35338	-1.46433	0.143103	2	0.670823	-4.63441	0.737958	TRUE	4.11759
DLM	fbiC_V441V	fbiC	441	-1.99526	1.54245	-1.29356	0.195816	1	1.02794	-5.01845	0.876651	FALSE	4.11759
DLM	ddn_L126L	ddn	126	-2.15972	1.96616	-1.09845	0.272008	1	1.69394	-6.01339	0.876651	FALSE	4.11759
DLM	fbiC_V41M	fbiC	41	-2.24398	1.94545	-1.15345	0.248725	1	1.5691	-6.05705	0.876651	FALSE	4.11759
DLM	fbiC_D341D	fbiC	341	-2.24398	1.94545	-1.15345	0.248725	1	1.5691	-6.05705	0.876651	FALSE	4.11759
DLM	Rv2983_G155S	Rv2983	155	-2.24398	1.37741	-1.62913	0.103286	2	0.455748	-4.9437	0.605325	FALSE	4.11759
DLM	fbiC_H230H	fbiC	230	-2.28001	1.94429	-1.17267	0.240929	1	1.5308	-6.09082	0.876651	FALSE	4.11759
DLM	_cons	DRUG	16	-7.17649	0.0759822	-94.4495	0	0	-7.02756	-7.32541	0	FALSE	4.11759
EMB	embC_G825G	embC	825	5.50184	6.3061	0.872462	0.382956	1	17.8618	-6.85813	0.871406	FALSE	1.96733
EMB	embA_R380L	embA	380	4.00028	1.07507	3.72094	0.0001985	2	6.10743	1.89314	0.00272035	FALSE	1.96733
EMB	embC_P110S:embA_T652K	embC	110	3.62862	4.51672	0.803375	0.421758	2	12.4814	-5.22415	0.881565	FALSE	1.96733
EMB	embB_Q445R	embB	445	3.6085	0.331237	10.894	0	38	4.25772	2.95927	0	TRUE	1.96733
EMB	embA_L659F	embA	659	3.60685	6.33559	0.5693	0.569153	1	16.0246	-8.81091	0.93248	FALSE	1.96733
EMB	ubiA_I179T	ubiA	179	3.36675	6.45649	0.521452	0.602052	1	16.0215	-9.28797	0.934688	FALSE	1.96733
EMB	embB_910_indel	embB	910	3.23704	0.839488	3.85596	0.0001153	1	4.88243	1.59164	0.00165538	FALSE	1.96733
EMB	ubiA_A38T	ubiA	38	3.12242	6.7727	0.46103	0.644777	1	16.3969	-10.1521	0.938405	FALSE	1.96733
EMB	embB_D328H	embB	328	3.05201	0.593427	5.14302	2.7e-07	2	4.21512	1.88889	5.61414e-06	TRUE	1.96733
EMB	embB_D328Y	embB	328	3.01266	0.307919	9.78395	0	9	3.61618	2.40914	0	TRUE	1.96733
EMB	embB_S347T	embB	347	2.87451	6.33057	0.454068	0.64978	1	15.2824	-9.53341	0.938405	FALSE	1.96733
EMB	embB_F330S	embB	330	2.74671	0.82631	3.32407	0.0008871	3	4.36628	1.12715	0.0103681	TRUE	1.96733
EMB	embA_H1011H	embA	1011	2.62048	0.839316	3.12216	0.0017953	1	4.26553	0.975417	0.0189924	FALSE	1.96733
EMB	embB_M306V	embB	306	2.60576	0.0454361	57.35	0	815	2.69482	2.51671	0	TRUE	1.96733
EMB	embB_Y319S	embB	319	2.59862	0.112936	23.0097	0	123	2.81998	2.37727	0	TRUE	1.96733
EMB	embB_A1007T:embB_I303M	embB	1007	2.5626	0.718807	3.56507	0.0003638	2	3.97146	1.15373	0.00476894	FALSE	1.96733
EMB	embB_G406C	embB	406	2.4375	0.237662	10.2561	0	14	2.90332	1.97168	0	TRUE	1.96733
EMB	embB_Q497R	embB	497	2.32598	0.0797881	29.152	0	232	2.48237	2.1696	0	TRUE	1.96733
EMB	embA_-44_indel	embA	-44	2.27812	0.492399	4.62656	3.72e-06	15	3.24322	1.31301	6.59753e-05	TRUE	1.96733
EMB	embB_G979A	embB	979	2.27051	6.31057	0.359795	0.719001	1	14.6392	-10.0982	0.9528	FALSE	1.96733
EMB	embB_F330L	embB	330	2.22106	0.838611	2.64849	0.0080852	1	3.86473	0.577377	0.066786	FALSE	1.96733
EMB	embB_M306L	embB	306	2.21413	0.167377	13.2285	0	32	2.54219	1.88608	0	TRUE	1.96733
EMB	embB_H1002R	embB	1002	2.08841	0.271611	7.68896	1.49e-14	10	2.62077	1.55605	3.74363e-13	TRUE	1.96733
EMB	embB_E405D	embB	405	2.05043	0.401872	5.10219	3.36e-07	9	2.83809	1.26276	6.7536e-06	TRUE	1.96733
EMB	ubiA_G234V	ubiA	234	2.00881	0.384318	5.22695	1.72e-07	5	2.76208	1.25555	3.70414e-06	TRUE	1.96733
EMB	embA_c-8g	embA	-8	2.00044	0.612426	3.26642	0.0010892	2	3.2008	0.800085	0.0119416	TRUE	1.96733
EMB	embB_L402V	embB	402	1.959	0.676532	2.89564	0.0037838	2	3.285	0.632993	0.0367361	TRUE	1.96733
EMB	ubiA_G41R	ubiA	41	1.95464	0.718075	2.72206	0.0064876	2	3.36207	0.547218	0.0575297	TRUE	1.96733
EMB	embA_c-15g	embA	-15	1.93137	0.585109	3.30088	0.0009638	3	3.07818	0.784557	0.0109655	TRUE	1.96733
EMB	embB_E521A:embA_S20P	embB	521	1.9259	0.852617	2.25881	0.0238949	1	3.59703	0.254774	0.169513	FALSE	1.96733
EMB	embB_M306I	embB	306	1.86486	0.0443655	42.034	0	638	1.95182	1.7779	0	TRUE	1.96733
EMB	embR_T6T	embR	6	1.85572	1.1924	1.55629	0.119639	1	4.19283	-0.481385	0.521242	FALSE	1.96733
EMB	ubiA_L40S	ubiA	40	1.85353	0.598843	3.09518	0.0019669	2	3.02726	0.679797	0.0197673	TRUE	1.96733
EMB	embB_Q497K	embB	497	1.82448	0.150456	12.1263	0	44	2.11937	1.52959	0	TRUE	1.96733
EMB	embA_g-43c	embA	-43	1.82204	0.177151	10.2852	0	36	2.16925	1.47482	0	TRUE	1.96733
EMB	embB_K165N	embB	165	1.80924	4.46486	0.405217	0.685318	2	10.5604	-6.9419	0.939713	FALSE	1.96733
EMB	embB_A505V	embB	505	1.80134	0.644536	2.79479	0.0051934	2	3.06463	0.538052	0.0474488	TRUE	1.96733
EMB	ubiA_L178V	ubiA	178	1.78947	0.390138	4.58677	4.5e-06	5	2.55414	1.0248	7.75286e-05	TRUE	1.96733
EMB	embB_Y319D	embB	319	1.7411	0.490697	3.54821	0.0003879	3	2.70286	0.779329	0.00497667	TRUE	1.96733
EMB	embC_A745T	embC	745	1.72807	0.606261	2.85038	0.0043668	2	2.91634	0.539799	0.0411434	FALSE	1.96733
EMB	embB_Y334H	embB	334	1.69208	0.341991	4.94775	7.51e-07	8	2.36239	1.02178	1.41517e-05	TRUE	1.96733
EMB	embB_D354A	embB	354	1.68087	0.116343	14.4475	0	69	1.90891	1.45284	0	TRUE	1.96733
EMB	embA_c-4t	embA	-4	1.67865	0.710385	2.36302	0.0181268	4	3.07101	0.286297	0.134944	TRUE	1.96733
EMB	embB_G406D	embB	406	1.66017	0.123283	13.4664	0	63	1.9018	1.41854	0	TRUE	1.96733
EMB	ubiA_L172V	ubiA	172	1.60911	0.833384	1.93082	0.0535054	1	3.24255	-0.0243194	0.293307	FALSE	1.96733
EMB	embC_R9G	embC	9	1.57488	0.839904	1.87507	0.0607834	1	3.22109	-0.0713348	0.318716	FALSE	1.96733
EMB	embA_T566M	embA	566	1.57399	0.622133	2.52999	0.0114067	2	2.79337	0.354608	0.0893278	TRUE	1.96733
EMB	embA_c-16a	embA	-16	1.57389	0.238004	6.61286	3.77e-11	17	2.04038	1.1074	9.09324e-10	TRUE	1.96733
EMB	embA_F499F	embA	499	1.56921	0.830497	1.88949	0.0588265	1	3.19699	-0.0585599	0.313915	FALSE	1.96733
EMB	embB_G406A	embB	406	1.56896	0.101269	15.493	0	128	1.76745	1.37047	0	TRUE	1.96733
EMB	embB_N399T	embB	399	1.55903	0.647534	2.40764	0.016056	2	2.8282	0.289862	0.121022	TRUE	1.96733
EMB	embB_S297A	embB	297	1.50711	0.315258	4.78055	1.75e-06	11	2.12501	0.889201	3.19773e-05	TRUE	1.96733
EMB	embA_c-16g	embA	-16	1.46828	0.138194	10.6248	0	53	1.73914	1.19742	0	TRUE	1.96733
EMB	embC_L1049V	embC	1049	1.46661	1.00588	1.45803	0.144831	1	3.43813	-0.504918	0.568228	FALSE	1.96733
EMB	embB_D1024N	embB	1024	1.45573	0.127518	11.4159	0	54	1.70567	1.2058	0	TRUE	1.96733
EMB	rmlD_S257P:embB_E378A:embC_T270I:iniA_H481Q	rmlD	257	1.45554	6.63146	0.21949	0.826269	412	14.4532	-11.5421	0.974934	TRUE	1.96733
EMB	embB_G406S	embB	406	1.44001	0.125913	11.4365	0	62	1.6868	1.19322	0	TRUE	1.96733
EMB	embA_c-8t	embA	-8	1.43447	0.329521	4.35319	1.34e-05	10	2.08033	0.788607	0.000218384	TRUE	1.96733
EMB	embB_Y319C	embB	319	1.40038	0.235458	5.94749	2.72e-09	14	1.86188	0.938885	6.30831e-08	TRUE	1.96733
EMB	ubiA_P122Q:embA_A1015T	ubiA	122	1.37217	1.34464	1.02047	0.307504	1	4.00767	-1.26333	0.82779	FALSE	1.96733
EMB	ubiA_S173A	ubiA	173	1.36896	0.632455	2.16452	0.0304245	2	2.60857	0.129349	0.206135	TRUE	1.96733
EMB	embB_M1000R	embB	1000	1.36685	0.698704	1.95626	0.0504343	2	2.73631	-0.00261186	0.286905	TRUE	1.96733
EMB	embB_A409P	embB	409	1.3446	1.1035	1.21848	0.223041	4	3.50746	-0.818269	0.718631	FALSE	1.96733
EMB	embB_N296Y	embB	296	1.33771	0.843459	1.58598	0.112743	1	2.99089	-0.315468	0.511159	FALSE	1.96733
EMB	ubiA_K174T	ubiA	174	1.32996	0.413423	3.21694	0.0012957	5	2.14027	0.519649	0.0139519	FALSE	1.96733
EMB	iniC_T395T	iniC	395	1.32263	0.603248	2.19252	0.0283419	2	2.505	0.140267	0.195571	FALSE	1.96733
EMB	embA_c-11a	embA	-11	1.31113	0.148346	8.83833	0	68	1.60189	1.02037	0	TRUE	1.96733
EMB	embB_E504D	embB	504	1.30688	0.59299	2.20388	0.0275331	2	2.46914	0.144615	0.193052	TRUE	1.96733
EMB	embB_Q497P	embB	497	1.29882	0.227408	5.71142	1.12e-08	18	1.74454	0.853102	2.50133e-07	TRUE	1.96733
EMB	ubiA_A94A	ubiA	94	1.29541	0.886978	1.46047	0.14416	1	3.03389	-0.443069	0.568228	FALSE	1.96733
EMB	embA_c-12t	embA	-12	1.23849	0.116928	10.5919	0	76	1.46767	1.00931	0	TRUE	1.96733
EMB	embB_V417A	embB	417	1.23704	0.839488	1.47356	0.1406	1	2.88243	-0.408361	0.568228	FALSE	1.96733
EMB	embC_279_indel	embC	279	1.23704	0.839488	1.47356	0.1406	1	2.88243	-0.408361	0.568228	FALSE	1.96733
EMB	rmlD_R276Q	rmlD	276	1.23704	0.839488	1.47356	0.1406	1	2.88243	-0.408361	0.568228	FALSE	1.96733
EMB	embA_c-8a	embA	-8	1.22167	0.297556	4.10569	4.03e-05	8	1.80488	0.638464	0.000592705	TRUE	1.96733
EMB	embR_237_indel	embR	237	1.21074	0.830986	1.45699	0.14512	1	2.83947	-0.417996	0.568228	FALSE	1.96733
EMB	embA_c-16t	embA	-16	1.18081	0.131572	8.97462	0	89	1.43869	0.922931	0	TRUE	1.96733
EMB	embB_L74R	embB	74	1.15649	0.903806	1.27957	0.200695	1	2.92795	-0.614972	0.695511	FALSE	1.96733
EMB	embB_D328G	embB	328	1.13848	0.367756	3.09576	0.0019631	9	1.85928	0.417683	0.0197673	TRUE	1.96733
EMB	embB_A454T	embB	454	1.13099	0.498888	2.26702	0.0233887	3	2.10881	0.153172	0.168587	FALSE	1.96733
EMB	embB_P197R	embB	197	1.12552	0.838761	1.34188	0.179636	1	2.76949	-0.518457	0.662292	FALSE	1.96733
EMB	embB_A680T	embB	680	1.12552	0.838761	1.34188	0.179636	1	2.76949	-0.518457	0.662292	FALSE	1.96733
EMB	embR_A70S	embR	70	1.12552	0.838761	1.34188	0.179636	19	2.76949	-0.518457	0.662292	FALSE	1.96733
EMB	embA_g-43t	embA	-43	1.12399	0.418632	2.68492	0.0072548	4	1.94451	0.303475	0.0634006	FALSE	1.96733
EMB	embB_V444M	embB	444	1.11825	0.594618	1.88062	0.0600239	2	2.2837	-0.0472015	0.317495	TRUE	1.96733
EMB	embR_D24Y	embR	24	1.09471	1.11986	0.977539	0.328302	2	3.28964	-1.10022	0.84601	FALSE	1.96733
EMB	embB_D78G	embB	78	1.09151	0.893289	1.22191	0.221744	1	2.84236	-0.659333	0.718631	FALSE	1.96733
EMB	embA_L215L	embA	215	1.09063	0.608232	1.79311	0.072955	2	2.28276	-0.101506	0.360589	TRUE	1.96733
EMB	embB_A439V	embB	439	1.08961	0.613092	1.77723	0.0755298	2	2.29127	-0.112053	0.367294	TRUE	1.96733
EMB	embB_1059_indel	embB	1059	1.08333	0.85282	1.27029	0.203983	1	2.75485	-0.588202	0.696076	FALSE	1.96733
EMB	embA_-35_indel	embA	-35	1.08252	0.237357	4.56074	5.1e-06	16	1.54774	0.617304	8.5425e-05	TRUE	1.96733
EMB	embA_L70L	embA	70	1.07191	0.322681	3.32189	0.0008941	10	1.70436	0.439455	0.0103681	FALSE	1.96733
EMB	iniC_P145Q	iniC	145	1.05139	0.596304	1.76318	0.0778698	2	2.22015	-0.117363	0.375644	FALSE	1.96733
EMB	embA_S20A	embA	20	1.04758	0.898283	1.1662	0.243534	1	2.80821	-0.713058	0.749239	FALSE	1.96733
EMB	embB_I303L	embB	303	1.04026	0.524611	1.98292	0.0473768	3	2.0685	0.0120217	0.27806	TRUE	1.96733
EMB	embB_G603R	embB	603	1.03836	0.708725	1.46512	0.142889	2	2.42747	-0.350737	0.568228	TRUE	1.96733
EMB	embB_V493M	embB	493	1.03089	0.688711	1.49684	0.134434	2	2.38077	-0.318981	0.555231	TRUE	1.96733
EMB	embB_I489T	embB	489	1.02409	0.84721	1.20878	0.226749	1	2.68462	-0.636443	0.719628	FALSE	1.96733
EMB	ubiA_V55L	ubiA	55	1.01987	0.721426	1.41369	0.157453	2	2.43387	-0.394124	0.604741	TRUE	1.96733
EMB	embR_V123M	embR	123	1.0198	0.609381	1.67349	0.09423	3	2.21418	-0.174591	0.443912	FALSE	1.96733
EMB	ubiA_F176S	ubiA	176	1.01013	0.844149	1.19662	0.231455	1	2.66466	-0.644407	0.726913	FALSE	1.96733
EMB	embC_T1036T	embC	1036	0.998931	0.92665	1.078	0.281033	7	2.81516	-0.817303	0.7956	TRUE	1.96733
EMB	ubiA_A39S	ubiA	39	0.995577	0.690597	1.44162	0.14941	5	2.34915	-0.357993	0.577528	TRUE	1.96733
EMB	embB_V130V	embB	130	0.969995	0.860833	1.12681	0.259823	1	2.65723	-0.717237	0.771788	FALSE	1.96733
EMB	embB_N296H	embB	296	0.95855	0.483072	1.98428	0.0472248	4	1.90537	0.0117282	0.27806	FALSE	1.96733
EMB	iniA_A4T	iniA	4	0.957238	1.08123	0.885323	0.375982	2	3.07645	-1.16197	0.871261	FALSE	1.96733
EMB	embA_A312V	embA	312	0.95592	0.358573	2.6659	0.0076783	6	1.65872	0.253116	0.0661431	FALSE	1.96733
EMB	ubiA_M180V	ubiA	180	0.944726	0.344037	2.746	0.0060327	11	1.61904	0.270413	0.0542943	TRUE	1.96733
EMB	ubiA_V229A	ubiA	229	0.944505	0.455394	2.07404	0.0380756	5	1.83708	0.051933	0.239162	TRUE	1.96733
EMB	embA_W306R	embA	306	0.940375	0.846333	1.11112	0.266518	2	2.59919	-0.718438	0.783818	TRUE	1.96733
EMB	ubiA_A35S	ubiA	35	0.915049	0.594535	1.5391	0.12378	39	2.08034	-0.250241	0.53314	TRUE	1.96733
EMB	embC_A733T	embC	733	0.899336	1.04249	0.862684	0.388311	2	2.94261	-1.14394	0.876322	FALSE	1.96733
EMB	embB_Q497H	embB	497	0.898108	0.437547	2.0526	0.0401117	5	1.7557	0.0405152	0.249354	TRUE	1.96733
EMB	ubiA_L31P	ubiA	31	0.894657	0.466108	1.91942	0.0549313	4	1.80823	-0.0189151	0.298411	TRUE	1.96733
EMB	1.lineage	LINEAGE	1	0.866814	0.381871	2.26991	0.0232128	0	1.61528	0.118347	0.168587	FALSE	1.96733
EMB	embC_V280A	embC	280	0.865104	0.406617	2.12756	0.0333735	5	1.66207	0.0681334	0.218742	TRUE	1.96733
EMB	embA_Q952Q	embA	952	0.854577	0.22875	3.73585	0.0001871	16	1.30293	0.406226	0.00262375	TRUE	1.96733
EMB	embA_-27_indel	embA	-27	0.849951	0.43212	1.96693	0.0491909	4	1.69691	0.0029961	0.285213	TRUE	1.96733
EMB	embC_P707P	embC	707	0.841667	0.847422	0.993208	0.320609	1	2.50262	-0.819281	0.844222	FALSE	1.96733
EMB	embA_G5V	embA	5	0.835318	0.381464	2.18977	0.0285411	6	1.58299	0.0876481	0.195571	TRUE	1.96733
EMB	embA_L456L	embA	456	0.823832	0.833742	0.988113	0.323097	1	2.45797	-0.810303	0.84601	FALSE	1.96733
EMB	iniA_L454L	iniA	454	0.818271	0.381113	2.14705	0.0317889	6	1.56525	0.0712892	0.212986	FALSE	1.96733
EMB	embC_R879G	embC	879	0.809315	0.897614	0.901629	0.367254	5	2.56864	-0.950008	0.871261	FALSE	1.96733
EMB	embR_A224A	embR	224	0.805011	0.839488	0.95893	0.337594	1	2.45041	-0.840386	0.848205	FALSE	1.96733
EMB	iniC_926_indel	iniC	926	0.805011	0.839488	0.95893	0.337594	1	2.45041	-0.840386	0.848205	FALSE	1.96733
EMB	ubiA_R261R	ubiA	261	0.805011	0.839488	0.95893	0.337594	5	2.45041	-0.840386	0.848205	FALSE	1.96733
EMB	ubiA_V55G	ubiA	55	0.800079	0.604127	1.32435	0.185385	2	1.98417	-0.384011	0.667498	TRUE	1.96733
EMB	embB_V117V:embA_L330L	embB	117	0.799153	0.920606	0.868073	0.385354	14	2.60354	-1.00523	0.873567	TRUE	1.96733
EMB	iniC_A50A	iniC	50	0.794838	0.606256	1.31106	0.189837	2	1.9831	-0.393423	0.673363	FALSE	1.96733
EMB	ubiA_M180I	ubiA	180	0.792953	0.370909	2.13786	0.0325278	5	1.51993	0.0659713	0.215541	TRUE	1.96733
EMB	embC_A92G	embC	92	0.792143	0.617011	1.28384	0.199198	2	2.00148	-0.417198	0.694314	FALSE	1.96733
EMB	embC_G174R	embC	174	0.790324	0.589632	1.34037	0.180126	3	1.946	-0.365355	0.662292	FALSE	1.96733
EMB	embA_c-11t	embA	-11	0.789956	0.310833	2.54142	0.0110403	10	1.39919	0.180724	0.0875961	TRUE	1.96733
EMB	embA_D112G	embA	112	0.785984	0.502711	1.56349	0.117937	3	1.7713	-0.199329	0.519096	FALSE	1.96733
EMB	ubiA_A249T	ubiA	249	0.765597	0.593831	1.28925	0.197311	13	1.92951	-0.398313	0.694314	TRUE	1.96733
EMB	rmlD_A230V	rmlD	230	0.765112	0.676397	1.13116	0.257988	2	2.09085	-0.560625	0.771788	TRUE	1.96733
EMB	embC_L204L	embC	204	0.761235	0.60906	1.24985	0.211354	2	1.95499	-0.432523	0.704292	FALSE	1.96733
EMB	iniA_L340P	iniA	340	0.757914	0.59437	1.27516	0.202254	2	1.92288	-0.407052	0.696076	TRUE	1.96733
EMB	iniA_L320L	iniA	320	0.757069	0.284998	2.6564	0.007898	9	1.31567	0.198472	0.0661458	FALSE	1.96733
EMB	iniA_H481Q:embB_E378A:embC_T270I	iniA	481	0.724553	0.771805	0.938777	0.347845	416	2.23729	-0.788185	0.863171	TRUE	1.96733
EMB	ubiA_F176L	ubiA	176	0.721083	0.373031	1.93304	0.0532318	6	1.45222	-0.0100584	0.293307	TRUE	1.96733
EMB	embC_A837A	embC	837	0.720931	0.589555	1.22284	0.221391	2	1.87646	-0.434598	0.718631	FALSE	1.96733
EMB	embC_G559G	embC	559	0.716903	0.494026	1.45115	0.146739	3	1.68519	-0.251387	0.570863	FALSE	1.96733
EMB	iniA_L166M	iniA	166	0.714228	0.839177	0.851105	0.394711	1	2.35902	-0.93056	0.876322	FALSE	1.96733
EMB	iniC_A39V	iniC	39	0.714228	0.606988	1.17667	0.239325	2	1.90392	-0.47547	0.740068	FALSE	1.96733
EMB	ubiA_R240C	ubiA	240	0.69775	0.455981	1.53022	0.125963	4	1.59147	-0.195972	0.534898	TRUE	1.96733
EMB	embB_P179P	embB	179	0.69349	0.607133	1.14224	0.253356	2	1.88347	-0.496491	0.763867	FALSE	1.96733
EMB	iniC_A453A	iniC	453	0.683585	1.19342	0.572796	0.566783	1	3.02269	-1.65552	0.93248	FALSE	1.96733
EMB	embA_R969W	embA	969	0.676684	0.830469	0.814822	0.415174	1	2.3044	-0.951035	0.881265	FALSE	1.96733
EMB	ubiA_I179V	ubiA	179	0.670183	0.837336	0.800375	0.423494	1	2.31136	-0.970996	0.881565	FALSE	1.96733
EMB	embB_C549F	embB	549	0.663389	0.847895	0.782396	0.433982	1	2.32526	-0.998485	0.885255	FALSE	1.96733
EMB	ubiA_S244S:embA_S1017A	ubiA	244	0.663389	0.847895	0.782396	0.433982	1	2.32526	-0.998485	0.885255	FALSE	1.96733
EMB	iniA_A635T	iniA	635	0.656801	0.415604	1.58035	0.114026	5	1.47138	-0.157782	0.511609	FALSE	1.96733
EMB	embA_G288G	embA	288	0.648335	0.15318	4.23249	2.31e-05	142	0.948569	0.348102	0.000357162	TRUE	1.96733
EMB	embC_A664T	embC	664	0.631273	0.608726	1.03704	0.299717	2	1.82437	-0.561829	0.812274	FALSE	1.96733
EMB	ubiA_A38V	ubiA	38	0.604672	0.24338	2.48447	0.0129743	14	1.0817	0.127647	0.100301	TRUE	1.96733
EMB	ubiA_A115T	ubiA	115	0.597163	0.83742	0.713099	0.475785	1	2.23851	-1.04418	0.905041	FALSE	1.96733
EMB	embC_E414E	embC	414	0.596394	0.505406	1.18003	0.237988	3	1.58699	-0.394201	0.739726	FALSE	1.96733
EMB	manB_L77I	manB	77	0.594722	0.79705	0.746154	0.455575	2	2.15694	-0.967496	0.887506	FALSE	1.96733
EMB	iniC_A63V	iniC	63	0.593604	1.19139	0.498246	0.618311	1	2.92872	-1.74151	0.934688	FALSE	1.96733
EMB	embB_R524H	embB	524	0.591238	0.725589	0.814839	0.415164	2	2.01339	-0.830916	0.881265	FALSE	1.96733
EMB	embB_S829S	embB	829	0.581243	0.319921	1.81683	0.0692428	7	1.20829	-0.0458024	0.350869	FALSE	1.96733
EMB	og2mic)	DRUG	18	0.581015	0.0115958	50.1054	0	0	0.603742	0.558287	0	FALSE	1.96733
EMB	embA_S704S	embA	704	0.579087	0.838226	0.690848	0.489661	1	2.22201	-1.06384	0.913331	FALSE	1.96733
EMB	embB_L114L	embB	114	0.579087	0.838226	0.690848	0.489661	1	2.22201	-1.06384	0.913331	FALSE	1.96733
EMB	embB_V803M	embB	803	0.579087	0.605672	0.956106	0.339019	2	1.7662	-0.608031	0.848251	FALSE	1.96733
EMB	rmlD_E74E	rmlD	74	0.579087	0.838226	0.690848	0.489661	5	2.22201	-1.06384	0.913331	FALSE	1.96733
EMB	embB_A379T	embB	379	0.574877	0.595479	0.965403	0.334343	2	1.74202	-0.592261	0.848205	FALSE	1.96733
EMB	manB_E66D:embA_L459R	manB	66	0.574877	0.839904	0.684455	0.493688	1	2.22109	-1.07134	0.913331	FALSE	1.96733
EMB	rmlD_I59V	rmlD	59	0.574877	0.839904	0.684455	0.493688	1	2.22109	-1.07134	0.913331	FALSE	1.96733
EMB	iniA_G5G	iniA	5	0.57255	0.836672	0.684318	0.493774	1	2.21243	-1.06733	0.913331	FALSE	1.96733
EMB	embB_E924E	embB	924	0.569388	0.59194	0.961901	0.336099	2	1.72959	-0.590815	0.848205	FALSE	1.96733
EMB	embB_L550L	embB	550	0.554195	0.604565	0.916683	0.359309	2	1.73914	-0.630753	0.871261	FALSE	1.96733
EMB	embB_P894P	embB	894	0.546941	0.282784	1.93413	0.0530969	9	1.1012	-0.00731506	0.293307	FALSE	1.96733
EMB	embB_R540R	embB	540	0.545239	0.859445	0.634408	0.525815	1	2.22975	-1.13927	0.93248	FALSE	1.96733
EMB	ubiA_F248L	ubiA	248	0.524627	0.435946	1.20342	0.228813	5	1.37908	-0.329827	0.722378	FALSE	1.96733
EMB	embA_A586A	embA	586	0.507571	0.503113	1.00886	0.313042	3	1.49367	-0.478531	0.83524	FALSE	1.96733
EMB	embA_P548P	embA	548	0.501838	0.606329	0.827667	0.407859	2	1.69024	-0.686566	0.878782	FALSE	1.96733
EMB	embB_A457T	embB	457	0.501838	0.8387	0.598352	0.549605	1	2.14569	-1.14201	0.93248	FALSE	1.96733
EMB	embC_V625L	embC	625	0.501838	0.8387	0.598352	0.549605	1	2.14569	-1.14201	0.93248	FALSE	1.96733
EMB	embR_V274D	embR	274	0.501838	0.606329	0.827667	0.407859	2	1.69024	-0.686566	0.878782	FALSE	1.96733
EMB	embA_L1031L	embA	1031	0.500206	0.584644	0.855575	0.392233	2	1.64611	-0.645695	0.876322	FALSE	1.96733
EMB	ubiA_A237V	ubiA	237	0.487615	0.198939	2.45107	0.014243	24	0.877535	0.0976941	0.108716	TRUE	1.96733
EMB	embB_S1054P	embB	1054	0.484941	0.433406	1.11891	0.26318	7	1.33442	-0.364535	0.777928	FALSE	1.96733
EMB	embR_!389!	embR	389	0.476974	0.357904	1.33269	0.182634	6	1.17847	-0.224517	0.667445	FALSE	1.96733
EMB	embA_G759R	embA	759	0.468516	0.890355	0.526213	0.598741	1	2.21361	-1.27658	0.932921	FALSE	1.96733
EMB	embA_Q47H	embA	47	0.467334	0.607016	0.769888	0.441366	2	1.65709	-0.722417	0.885255	FALSE	1.96733
EMB	embC_Q153R	embC	153	0.467334	0.839197	0.556882	0.577608	1	2.11216	-1.17749	0.93248	FALSE	1.96733
EMB	manB_I279I	manB	279	0.467334	0.607016	0.769888	0.441366	2	1.65709	-0.722417	0.885255	FALSE	1.96733
EMB	embA_G321A	embA	321	0.465296	0.648446	0.717556	0.473031	2	1.73625	-0.805657	0.905041	FALSE	1.96733
EMB	embB_C361S	embB	361	0.463356	0.838766	0.552426	0.580657	3	2.10734	-1.18063	0.93248	FALSE	1.96733
EMB	embB_P957P	embB	957	0.463356	0.838766	0.552426	0.580657	1	2.10734	-1.18063	0.93248	FALSE	1.96733
EMB	embC_A448V	embC	448	0.463356	0.838766	0.552426	0.580657	1	2.10734	-1.18063	0.93248	FALSE	1.96733
EMB	embC_R806L	embC	806	0.463356	0.838766	0.552426	0.580657	1	2.10734	-1.18063	0.93248	FALSE	1.96733
EMB	embR_A306T	embR	306	0.463356	0.838766	0.552426	0.580657	1	2.10734	-1.18063	0.93248	FALSE	1.96733
EMB	iniA_G183G	iniA	183	0.463356	0.593873	0.780228	0.435257	2	1.62735	-0.700634	0.885255	FALSE	1.96733
EMB	iniA_Q394E	iniA	394	0.463356	0.838766	0.552426	0.580657	1	2.10734	-1.18063	0.93248	FALSE	1.96733
EMB	iniC_R85G	iniC	85	0.463356	0.838766	0.552426	0.580657	1	2.10734	-1.18063	0.93248	FALSE	1.96733
EMB	manB_Q136Q	manB	136	0.463356	0.838766	0.552426	0.580657	1	2.10734	-1.18063	0.93248	FALSE	1.96733
EMB	rmlD_E6D	rmlD	6	0.463356	0.838766	0.552426	0.580657	1	2.10734	-1.18063	0.93248	FALSE	1.96733
EMB	rmlD_T284K	rmlD	284	0.463356	0.838766	0.552426	0.580657	1	2.10734	-1.18063	0.93248	FALSE	1.96733
EMB	ubiA_K174R	ubiA	174	0.463162	0.604258	0.766498	0.44338	2	1.64751	-0.721182	0.885292	FALSE	1.96733
EMB	iniA_310_indel	iniA	310	0.455566	1.08052	0.421617	0.673304	1	2.57339	-1.66225	0.938405	FALSE	1.96733
EMB	embC_R20L	embC	20	0.455434	0.935688	0.486737	0.626445	1	2.28938	-1.37851	0.93796	FALSE	1.96733
EMB	ubiA_V148A	ubiA	148	0.45449	0.831794	0.546398	0.584793	1	2.08481	-1.17583	0.93248	FALSE	1.96733
EMB	embR_S359S	embR	359	0.438497	0.85884	0.510569	0.609653	1	2.12182	-1.24483	0.934688	FALSE	1.96733
EMB	embA_H1061H	embA	1061	0.437194	0.896869	0.487467	0.625927	1	2.19506	-1.32067	0.93796	FALSE	1.96733
EMB	embC_L49L	embC	49	0.431241	0.265023	1.62719	0.103697	13	0.950686	-0.088203	0.480996	FALSE	1.96733
EMB	embB_D1056E	embB	1056	0.43001	0.836409	0.514115	0.607172	1	2.06937	-1.20935	0.934688	FALSE	1.96733
EMB	embB_G156C:embA_A813G	embB	156	0.429246	0.272636	1.57443	0.115388	33	0.963612	-0.10512	0.511609	FALSE	1.96733
EMB	embC_M800I	embC	800	0.42754	0.597776	0.715218	0.474475	2	1.59918	-0.744101	0.905041	TRUE	1.96733
EMB	embA_F504F	embA	504	0.41927	0.841888	0.498012	0.618475	1	2.06937	-1.23083	0.934688	FALSE	1.96733
EMB	manB_R316W	manB	316	0.40938	0.528745	0.774247	0.438785	3	1.44572	-0.626961	0.885255	FALSE	1.96733
EMB	embA_L208F	embA	208	0.407466	0.67437	0.604217	0.5457	2	1.72923	-0.9143	0.93248	FALSE	1.96733
EMB	iniA_S501S	iniA	501	0.404311	0.389459	1.03813	0.299208	6	1.16765	-0.359029	0.812274	FALSE	1.96733
EMB	iniA_I224N	iniA	224	0.401265	0.609188	0.658688	0.510096	2	1.59527	-0.792743	0.929268	FALSE	1.96733
EMB	manB_V178V	manB	178	0.388956	0.191798	2.02795	0.0425654	58	0.764879	0.0130326	0.259996	FALSE	1.96733
EMB	embA_I74I	embA	74	0.382207	0.593237	0.644274	0.519398	2	1.54495	-0.780537	0.93248	TRUE	1.96733
EMB	embA_L88L	embA	88	0.381445	0.611136	0.624157	0.532524	2	1.57927	-0.816381	0.93248	TRUE	1.96733
EMB	embB_T157T	embB	157	0.364387	0.506669	0.719181	0.472029	3	1.35746	-0.628685	0.905041	FALSE	1.96733
EMB	iniC_P22P	iniC	22	0.363944	0.371986	0.978379	0.327887	11	1.09304	-0.365149	0.84601	FALSE	1.96733
EMB	ubiA_A35A	ubiA	35	0.360072	0.653035	0.551382	0.581372	3	1.64002	-0.919876	0.93248	FALSE	1.96733
EMB	embB_W332R	embB	332	0.346548	0.843023	0.411078	0.681016	2	1.99887	-1.30578	0.939713	TRUE	1.96733
EMB	embB_L833L	embB	833	0.336389	0.322549	1.04291	0.296992	9	0.968586	-0.295808	0.812274	FALSE	1.96733
EMB	embA_L387L	embA	387	0.335895	0.928275	0.361848	0.717465	1	2.15531	-1.48352	0.9528	FALSE	1.96733
EMB	embB_T1082A	embB	1082	0.331621	0.146381	2.26546	0.0234848	132	0.618528	0.044713	0.168587	FALSE	1.96733
EMB	iniA_H457D:embC_L1075L	iniA	457	0.330168	0.841794	0.39222	0.694896	1	1.98009	-1.31975	0.942046	FALSE	1.96733
EMB	ubiA_L158S	ubiA	158	0.33001	0.26141	1.26242	0.206796	13	0.842374	-0.182353	0.700551	TRUE	1.96733
EMB	embR_D107N	embR	107	0.326695	0.363364	0.899087	0.368606	6	1.03889	-0.385497	0.871261	TRUE	1.96733
EMB	embB_R267P	embB	267	0.326621	0.596771	0.547314	0.584163	2	1.49629	-0.84305	0.93248	FALSE	1.96733
EMB	embB_K561R	embB	561	0.326621	0.430266	0.759114	0.447784	4	1.16994	-0.5167	0.886058	FALSE	1.96733
EMB	embB_Y835Y	embB	835	0.326621	0.600609	0.543816	0.586568	2	1.50382	-0.850573	0.93248	FALSE	1.96733
EMB	embC_A505T:embB_L632L	embC	505	0.326621	0.609146	0.536195	0.591823	2	1.52055	-0.867304	0.932921	FALSE	1.96733
EMB	embC_I790I	embC	790	0.326621	0.596771	0.547314	0.584163	3	1.49629	-0.84305	0.93248	TRUE	1.96733
EMB	embA_G352S	embA	352	0.325548	0.847587	0.384088	0.700913	1	1.98682	-1.33572	0.943416	FALSE	1.96733
EMB	embB_A1073D	embB	1073	0.324665	0.30779	1.05483	0.291504	8	0.927933	-0.278602	0.812274	FALSE	1.96733
EMB	embB_Y334Y	embB	334	0.315045	0.378117	0.833195	0.404735	5	1.05615	-0.426064	0.878782	FALSE	1.96733
EMB	embC_L155L	embC	155	0.311397	0.639897	0.486637	0.626516	3	1.56559	-0.9428	0.93796	FALSE	1.96733
EMB	embB_Q853R	embB	853	0.310545	0.905503	0.342953	0.731634	1	2.08533	-1.46424	0.953748	FALSE	1.96733
EMB	embB_V456A	embB	456	0.305777	0.249239	1.22684	0.219881	34	0.794285	-0.18273	0.718631	TRUE	1.96733
EMB	iniC_L60L	iniC	60	0.305011	0.606048	0.503278	0.614769	2	1.49287	-0.882844	0.934688	FALSE	1.96733
EMB	ubiA_I179S	ubiA	179	0.303751	0.82269	0.369217	0.711966	1	1.91622	-1.30872	0.9528	FALSE	1.96733
EMB	embA_L33L	embA	33	0.302782	0.682514	0.443628	0.657312	2	1.64051	-1.03495	0.938405	FALSE	1.96733
EMB	iniA_A114A:embC_T492N	iniA	114	0.302671	0.405941	0.745604	0.455906	5	1.09831	-0.492972	0.887506	FALSE	1.96733
EMB	ubiA_L101L	ubiA	101	0.300943	0.851521	0.353418	0.723775	2	1.96993	-1.36804	0.9528	FALSE	1.96733
EMB	iniA_V110I	iniA	110	0.27828	0.591274	0.470645	0.637894	2	1.43718	-0.880617	0.938171	TRUE	1.96733
EMB	embA_N54D	embA	54	0.278143	0.648014	0.429224	0.66776	39	1.54825	-0.991965	0.938405	TRUE	1.96733
EMB	embC_G687E:embB_S773P	embC	687	0.277871	0.260307	1.06747	0.285758	17	0.788072	-0.232331	0.805197	TRUE	1.96733
EMB	embA_I905V	embA	905	0.273539	0.359095	0.761746	0.446212	6	0.977366	-0.430287	0.886058	TRUE	1.96733
EMB	iniA_G21G	iniA	21	0.268543	0.426796	0.629207	0.529214	4	1.10506	-0.567977	0.93248	FALSE	1.96733
EMB	iniA_L477P	iniA	477	0.266696	0.514402	0.518459	0.604138	3	1.27492	-0.741532	0.934688	FALSE	1.96733
EMB	embB_E901D	embB	901	0.262576	0.839122	0.312917	0.754344	1	1.90725	-1.3821	0.953748	FALSE	1.96733
EMB	embC_A279T	embC	279	0.262576	0.839122	0.312917	0.754344	1	1.90725	-1.3821	0.953748	FALSE	1.96733
EMB	iniC_T82A	iniC	82	0.262576	0.594375	0.441767	0.658658	2	1.42755	-0.9024	0.938405	FALSE	1.96733
EMB	ubiA_T214T	ubiA	214	0.2598	0.493581	0.526357	0.598641	3	1.22722	-0.70762	0.932921	TRUE	1.96733
EMB	embC_R30W	embC	30	0.256046	0.608181	0.421003	0.673753	2	1.44808	-0.935989	0.938405	FALSE	1.96733
EMB	embB_T588M	embB	588	0.254032	0.524885	0.483976	0.628403	3	1.28281	-0.774743	0.93796	FALSE	1.96733
EMB	embC_V704V	embC	704	0.247574	0.958512	0.25829	0.796183	1	2.12626	-1.63111	0.957935	FALSE	1.96733
EMB	embB_G294G	embB	294	0.247534	0.419861	0.589563	0.555484	5	1.07046	-0.575393	0.93248	FALSE	1.96733
EMB	embA_L764L	embA	764	0.237036	0.839488	0.282357	0.777669	1	1.88243	-1.40836	0.953748	FALSE	1.96733
EMB	embC_A57T	embC	57	0.237036	0.839488	0.282357	0.777669	1	1.88243	-1.40836	0.953748	FALSE	1.96733
EMB	ubiA_V188A	ubiA	188	0.233179	0.255824	0.911481	0.362042	15	0.734594	-0.268236	0.871261	TRUE	1.96733
EMB	embA_A401A	embA	401	0.228667	0.604358	0.378363	0.705161	2	1.41321	-0.955874	0.94702	TRUE	1.96733
EMB	ubiA_Y233Y	ubiA	233	0.228071	0.839642	0.271629	0.785907	1	1.87377	-1.41763	0.955448	FALSE	1.96733
EMB	embA_G972R	embA	972	0.21258	0.582522	0.36493	0.715163	2	1.35432	-0.929163	0.9528	FALSE	1.96733
EMB	embB_G246R	embB	246	0.209624	0.309997	0.676213	0.498906	12	0.817219	-0.397971	0.918432	FALSE	1.96733
EMB	iniC_L178L	iniC	178	0.201393	0.682959	0.294883	0.768083	3	1.53999	-1.13721	0.953748	FALSE	1.96733
EMB	embC_F286L	embC	286	0.199248	0.8404	0.237087	0.81259	1	1.84643	-1.44794	0.968363	FALSE	1.96733
EMB	iniA_L512L	iniA	512	0.197944	0.599521	0.33017	0.741272	2	1.373	-0.977117	0.953748	FALSE	1.96733
EMB	embC_V974L	embC	974	0.193182	0.309475	0.624223	0.532481	10	0.799753	-0.41339	0.93248	FALSE	1.96733
EMB	embC_A931T	embC	931	0.191273	0.591877	0.323164	0.746571	2	1.35135	-0.968806	0.953748	FALSE	1.96733
EMB	embB_H687Y	embB	687	0.17776	0.618489	0.28741	0.773798	2	1.39	-1.03448	0.953748	FALSE	1.96733
EMB	embB_P809P	embB	809	0.173157	0.848402	0.204097	0.838278	1	1.83603	-1.48971	0.981517	FALSE	1.96733
EMB	embA_G729R	embA	729	0.169957	0.531274	0.319905	0.74904	5	1.21126	-0.871341	0.953748	FALSE	1.96733
EMB	embR_g-93a	embR	-93	0.166654	0.56235	0.296353	0.766961	4	1.26886	-0.935552	0.953748	FALSE	1.96733
EMB	rmlD_g-71t	rmlD	-71	0.160574	0.315394	0.509122	0.610667	12	0.778746	-0.457598	0.934688	FALSE	1.96733
EMB	iniC_L161L	iniC	161	0.153732	0.587736	0.261566	0.793656	2	1.30569	-0.998231	0.957935	TRUE	1.96733
EMB	iniA_F286C	iniA	286	0.14724	0.239611	0.614498	0.538887	37	0.616877	-0.322397	0.93248	FALSE	1.96733
EMB	iniA_F463F	iniA	463	0.147164	0.834959	0.176253	0.860095	1	1.78368	-1.48936	0.992948	FALSE	1.96733
EMB	embR_359_indel	embR	359	0.146479	0.358644	0.408423	0.682963	7	0.84942	-0.556463	0.939713	TRUE	1.96733
EMB	iniC_Q355!	iniC	355	0.136779	0.383929	0.356262	0.721645	5	0.88928	-0.615722	0.9528	FALSE	1.96733
EMB	ubiA_G268D:embA_A662A	ubiA	268	0.131306	0.229736	0.571552	0.567626	23	0.581588	-0.318976	0.93248	FALSE	1.96733
EMB	embA_c-59a	embA	-59	0.131148	0.45463	0.288472	0.772985	4	1.02222	-0.759927	0.953748	FALSE	1.96733
EMB	embB_V67V	embB	67	0.129537	0.504815	0.256603	0.797485	3	1.11897	-0.8599	0.957935	FALSE	1.96733
EMB	embC_P1007P	embC	1007	0.128263	0.826818	0.155128	0.87672	1	1.74883	-1.4923	0.992948	FALSE	1.96733
EMB	rmlD_R27W	rmlD	27	0.128263	0.589667	0.217518	0.827805	2	1.28401	-1.02748	0.974934	FALSE	1.96733
EMB	embB_A517A	embB	517	0.125515	0.838761	0.149643	0.881046	3	1.76949	-1.51846	0.992948	TRUE	1.96733
EMB	embC_L353L	embC	353	0.125515	0.606413	0.206979	0.836026	2	1.31408	-1.06305	0.980785	FALSE	1.96733
EMB	embR_L39L	embR	39	0.125515	0.838761	0.149643	0.881046	1	1.76949	-1.51846	0.992948	FALSE	1.96733
EMB	embR_L197L	embR	197	0.125515	0.838761	0.149643	0.881046	1	1.76949	-1.51846	0.992948	FALSE	1.96733
EMB	iniC_Y18C	iniC	18	0.123743	0.397436	0.311354	0.755532	5	0.902718	-0.655231	0.953748	FALSE	1.96733
EMB	embC_N176K	embC	176	0.121743	0.848755	0.143437	0.885945	1	1.7853	-1.54182	0.992983	FALSE	1.96733
EMB	embC_T492T	embC	492	0.118315	0.622198	0.190156	0.849187	2	1.33782	-1.10119	0.986627	FALSE	1.96733
EMB	embR_g-69a	embR	-69	0.117211	0.59441	0.197189	0.843679	2	1.28225	-1.04783	0.98402	TRUE	1.96733
EMB	embC_K656N	embC	656	0.116659	0.414096	0.28172	0.778158	4	0.928287	-0.694969	0.953748	FALSE	1.96733
EMB	ubiA_E273D	ubiA	273	0.111616	0.337085	0.331121	0.740553	9	0.772301	-0.54907	0.953748	FALSE	1.96733
EMB	embR_1042_indel	embR	1042	0.102601	0.385715	0.266003	0.790237	7	0.858604	-0.653401	0.957935	FALSE	1.96733
EMB	embR_A178A	embR	178	0.0990018	0.214626	0.461276	0.644601	17	0.519668	-0.321665	0.938405	FALSE	1.96733
EMB	embB_R620C	embB	620	0.0983144	0.381929	0.257415	0.796858	5	0.846896	-0.650267	0.957935	FALSE	1.96733
EMB	embA_A694A	embA	694	0.0925988	0.604452	0.153195	0.878245	2	1.27732	-1.09213	0.992948	FALSE	1.96733
EMB	iniC_P132P	iniC	132	0.0885937	0.594004	0.149147	0.881438	2	1.25284	-1.07565	0.992948	TRUE	1.96733
EMB	embC_F67V	embC	67	0.0864228	0.611807	0.141258	0.887666	2	1.28556	-1.11272	0.993066	FALSE	1.96733
EMB	embB_A510A	embB	510	0.0790867	0.312849	0.252795	0.800427	10	0.692271	-0.534098	0.959557	FALSE	1.96733
EMB	embC_P772A	embC	772	0.0790867	0.591822	0.133632	0.893693	2	1.23906	-1.08088	0.996113	FALSE	1.96733
EMB	embC_N176H:embB_R915R	embC	176	0.0748769	0.606624	0.123432	0.901765	2	1.26386	-1.11411	0.996289	FALSE	1.96733
EMB	embB_V377V	embB	377	0.0737645	0.387572	0.190325	0.849055	5	0.833406	-0.685877	0.986627	TRUE	1.96733
EMB	embR_T164A	embR	164	0.0736209	0.299577	0.245749	0.805876	9	0.660793	-0.513551	0.964174	FALSE	1.96733
EMB	embB_T643I	embB	643	0.0725503	0.602126	0.12049	0.904095	2	1.25272	-1.10762	0.996289	FALSE	1.96733
EMB	iniC_T259I	iniC	259	0.0694089	0.604861	0.114752	0.908642	2	1.25494	-1.11612	0.996289	FALSE	1.96733
EMB	embB_L1053L	embB	1053	0.0671129	0.585363	0.114652	0.908721	2	1.21442	-1.0802	0.996289	TRUE	1.96733
EMB	embB_D1017E	embB	1017	0.0610443	0.529368	0.115315	0.908195	3	1.0986	-0.976516	0.996289	FALSE	1.96733
EMB	embC_M351T	embC	351	0.0523685	0.301771	0.173537	0.862229	11	0.643839	-0.539102	0.992948	FALSE	1.96733
EMB	embA_P285P	embA	285	0.0513929	0.604901	0.0849609	0.932292	2	1.237	-1.13421	1	FALSE	1.96733
EMB	embA_K782K	embA	782	0.0513929	0.604901	0.0849609	0.932292	2	1.237	-1.13421	1	FALSE	1.96733
EMB	iniC_G216G	iniC	216	0.0513929	0.604901	0.0849609	0.932292	2	1.237	-1.13421	1	FALSE	1.96733
EMB	ubiA_g-6t	ubiA	-6	0.0498146	1.00567	0.0495336	0.960494	1	2.02093	-1.9213	1	FALSE	1.96733
EMB	embB_D869G	embB	869	0.0487923	0.612966	0.0796002	0.936555	2	1.25021	-1.15262	1	FALSE	1.96733
EMB	embA_L500L	embA	500	0.0462726	0.682873	0.0677616	0.945975	2	1.3847	-1.29216	1	TRUE	1.96733
EMB	iniA_R603L	iniA	603	0.0445401	0.42243	0.105438	0.916028	4	0.872502	-0.783422	1	FALSE	1.96733
EMB	embR_A141A	embR	141	0.0377687	0.611658	0.061748	0.950763	2	1.23662	-1.16108	1	FALSE	1.96733
EMB	embC_G186C	embC	186	0.0375198	0.869856	0.0431334	0.965595	1	1.74244	-1.6674	1	FALSE	1.96733
EMB	embA_g-75c	embA	-75	0.0351823	0.669345	0.0525623	0.958081	3	1.3471	-1.27673	1	FALSE	1.96733
EMB	embR_R102P	embR	102	0.0348214	0.58994	0.0590254	0.952932	2	1.1911	-1.12146	1	FALSE	1.96733
EMB	_cons	DRUG	16	0.0326658	0.050642	0.645034	0.518905	0	0.131924	-0.0665925	0.93248	FALSE	1.96733
EMB	embC_L333L	embC	333	0.0303127	0.58484	0.0518308	0.958664	2	1.1766	-1.11597	1	FALSE	1.96733
EMB	iniC_A21A	iniC	21	0.0301401	0.324169	0.0929763	0.925922	8	0.665512	-0.605232	1	FALSE	1.96733
EMB	ns[cluster100])	DRUG	17	0.0301041	0.0060632	4.96501	6.87e-07	0	0.041988	0.0182202	1.33633e-05	FALSE	1.96733
EMB	embB_A196A	embB	196	0.0270498	0.586252	0.0461403	0.963198	4	1.1761	-1.122	1	TRUE	1.96733
EMB	iniC_P248A	iniC	248	0.0256771	0.503935	0.0509531	0.959363	7	1.01339	-0.962036	1	FALSE	1.96733
EMB	embC_T609A	embC	609	0.0249073	1.00418	0.0248036	0.980212	1	1.9931	-1.94329	1	FALSE	1.96733
EMB	iniA_I174F:embA_L660L	iniA	174	0.0236243	0.599879	0.0393818	0.968586	2	1.19939	-1.15214	1	FALSE	1.96733
EMB	embA_P633P	embA	633	0.0229272	0.283081	0.0809919	0.935448	9	0.577765	-0.531911	1	TRUE	1.96733
EMB	iniC_E308K:iniC_R8G	iniC	308	0.0206903	0.629462	0.0328699	0.973778	2	1.25444	-1.21306	1	FALSE	1.96733
EMB	embC_V896V	embC	896	0.0150497	0.421295	0.0357225	0.971504	26	0.840788	-0.810689	1	FALSE	1.96733
EMB	iniA_P126P	iniA	126	0.0098387	0.229347	0.042899	0.965782	43	0.459358	-0.439681	1	FALSE	1.96733
EMB	embC_I406V	embC	406	0.0090212	0.604809	0.0149157	0.988099	2	1.19445	-1.1764	1	FALSE	1.96733
EMB	embB_D240G	embB	240	0.0065149	0.843533	0.0077234	0.993838	1	1.65984	-1.64681	1	FALSE	1.96733
EMB	embB_V783I	embB	783	0.0065149	0.612996	0.010628	0.99152	2	1.20799	-1.19496	1	FALSE	1.96733
EMB	embB_A457A	embB	457	0.0031198	0.312228	0.009992	0.992028	11	0.615087	-0.608847	1	FALSE	1.96733
EMB	embA_L177L	embA	177	0.0018383	0.604956	0.0030388	0.997575	2	1.18755	-1.18388	1	FALSE	1.96733
EMB	embC_A664E	embC	664	0.0018383	0.592494	0.0031027	0.997524	2	1.16313	-1.15945	1	FALSE	1.96733
EMB	iniA_I551M	iniA	551	0.0018383	0.604956	0.0030388	0.997575	2	1.18755	-1.18388	1	FALSE	1.96733
EMB	embA_A671A	embA	671	0.0002063	0.583199	0.0003538	0.999718	2	1.14328	-1.14286	1	FALSE	1.96733
EMB	iniC_P377S	iniC	377	2.16e-12	1.03324	2.09e-12	1	2	2.02516	-2.02516	1	FALSE	1.96733
EMB	iniA_Q81R	iniA	81	-4.18e-11	0.938507	-4.46e-11	1	1	1.83947	-1.83947	1	FALSE	1.96733
EMB	rmlD_V221V	rmlD	221	-5.47e-11	1.18464	-4.62e-11	1	1	2.3219	-2.3219	1	FALSE	1.96733
EMB	embB_V131M	embB	131	-0.0009112	0.59706	-0.0015261	0.998782	2	1.16933	-1.17115	1	FALSE	1.96733
EMB	embA_A1092A:ubiA_G302G	embA	1092	-0.0057726	0.200938	-0.0287285	0.977081	97	0.388066	-0.399611	1	FALSE	1.96733
EMB	manB_L137L	manB	137	-0.0067978	0.687264	-0.0098911	0.992108	3	1.34024	-1.35384	1	FALSE	1.96733
EMB	iniC_D228D	iniC	228	-0.0109247	0.786393	-0.0138922	0.988916	6	1.53041	-1.55225	1	TRUE	1.96733
EMB	embC_A387V	embC	387	-0.0136048	0.188153	-0.0723071	0.942357	198	0.355174	-0.382384	1	FALSE	1.96733
EMB	embA_R68P	embA	68	-0.0140536	0.601731	-0.0233553	0.981367	2	1.16534	-1.19345	1	FALSE	1.96733
EMB	embA_S1025L	embA	1025	-0.0160196	0.839966	-0.0190718	0.984784	1	1.63031	-1.66235	1	FALSE	1.96733
EMB	embC_E875Q	embC	875	-0.0170014	0.353807	-0.0480527	0.961674	7	0.67646	-0.710462	1	FALSE	1.96733
EMB	embA_Q38Q	embA	38	-0.019396	0.201704	-0.0961606	0.923393	100	0.375945	-0.414737	1	FALSE	1.96733
EMB	iniC_L177L:embC_L666L	iniC	177	-0.0232511	0.523214	-0.0444391	0.964554	3	1.00225	-1.04875	1	FALSE	1.96733
EMB	2.lineage	LINEAGE	2	-0.0345042	0.0421657	-0.8183	0.413186	0	0.0481406	-0.117149	0.881265	FALSE	1.96733
EMB	embB_F79F	embB	79	-0.0355455	0.846697	-0.0419814	0.966514	1	1.62398	-1.69507	1	FALSE	1.96733
EMB	embB_T520T	embB	520	-0.036644	0.592587	-0.0618373	0.950692	2	1.12483	-1.19811	1	TRUE	1.96733
EMB	rmlD_L282L	rmlD	282	-0.0374996	0.257619	-0.145563	0.884267	41	0.467433	-0.542432	0.992948	TRUE	1.96733
EMB	embA_L373P	embA	373	-0.0412884	0.354215	-0.116563	0.907206	6	0.652972	-0.735549	0.996289	TRUE	1.96733
EMB	iniC_F233V:iniA_S326A	iniC	233	-0.0416468	0.450997	-0.092344	0.926425	4	0.842307	-0.9256	1	FALSE	1.96733
EMB	iniA_S207N	iniA	207	-0.0505939	0.490038	-0.103245	0.917769	3	0.909881	-1.01107	1	TRUE	1.96733
EMB	embB_G580S	embB	580	-0.0507126	0.847955	-0.0598058	0.95231	2	1.61128	-1.7127	1	TRUE	1.96733
EMB	embA_A302A	embA	302	-0.0517048	0.594692	-0.0869438	0.930716	2	1.11389	-1.2173	1	FALSE	1.96733
EMB	embB_T1027T	embB	1027	-0.0521941	0.32634	-0.159938	0.87293	26	0.587433	-0.691821	0.992948	FALSE	1.96733
EMB	rmlD_A195A	rmlD	195	-0.0558025	0.848871	-0.0657373	0.947587	1	1.60799	-1.71959	1	FALSE	1.96733
EMB	embC_A711T	embC	711	-0.0596251	0.616844	-0.0966614	0.922995	2	1.14939	-1.26864	1	FALSE	1.96733
EMB	manB_A217A:embC_D252D	manB	217	-0.0596251	0.846333	-0.070451	0.943835	1	1.59919	-1.71844	1	FALSE	1.96733
EMB	embB_W1089R	embB	1089	-0.0598483	0.608698	-0.098322	0.921677	2	1.1332	-1.2529	1	FALSE	1.96733
EMB	iniA_L55L	iniA	55	-0.0696552	0.443551	-0.15704	0.875213	24	0.799705	-0.939015	0.992948	TRUE	1.96733
EMB	embB_N807D	embB	807	-0.0764335	0.51622	-0.148064	0.882292	3	0.935357	-1.08822	0.992948	FALSE	1.96733
EMB	iniA_S84R	iniA	84	-0.0823779	0.847889	-0.0971564	0.922602	2	1.57949	-1.74424	1	FALSE	1.96733
EMB	11.siteid	SITEID	13	-0.0838448	0.37965	-0.220848	0.825211	0	0.660268	-0.827958	0.974934	FALSE	1.96733
EMB	10.siteid	SITEID	12	-0.0840588	0.0575733	-1.46003	0.144282	0	0.0287849	-0.196902	0.568228	FALSE	1.96733
EMB	iniA_R63R	iniA	63	-0.0847003	0.659728	-0.128387	0.897843	4	1.20837	-1.37777	0.996289	FALSE	1.96733
EMB	embA_Y503Y	embA	503	-0.0866018	0.429931	-0.201432	0.840361	4	0.756063	-0.929266	0.98205	FALSE	1.96733
EMB	embA_g-17a	embA	-17	-0.088025	0.266045	-0.330865	0.740746	15	0.433423	-0.609473	0.953748	TRUE	1.96733
EMB	iniA_E154A	iniA	154	-0.0959286	0.318866	-0.300843	0.763534	8	0.529049	-0.720906	0.953748	FALSE	1.96733
EMB	rmlD_A115V	rmlD	115	-0.103509	0.286803	-0.360907	0.718169	15	0.458624	-0.665642	0.9528	FALSE	1.96733
EMB	iniC_S285S	iniC	285	-0.104469	0.268087	-0.389684	0.69677	62	0.420981	-0.62992	0.942046	FALSE	1.96733
EMB	embA_L344P	embA	344	-0.108712	0.71703	-0.151614	0.879492	2	1.29667	-1.51409	0.992948	FALSE	1.96733
EMB	3.lineage	LINEAGE	3	-0.111521	0.0584154	-1.9091	0.056249	0	0.00297338	-0.226015	0.302841	FALSE	1.96733
EMB	5.siteid	SITEID	9	-0.111753	0.056388	-1.98185	0.0474961	0	-0.00123202	-0.222273	0.27806	FALSE	1.96733
EMB	embB_I563L	embB	563	-0.111976	0.217947	-0.513776	0.607409	19	0.3152	-0.539153	0.934688	FALSE	1.96733
EMB	embB_N13S	embB	13	-0.112633	0.946396	-0.119013	0.905265	1	1.7423	-1.96757	0.996289	FALSE	1.96733
EMB	rmlD_c-18t	rmlD	-18	-0.112633	0.977665	-0.115206	0.908282	1	1.80359	-2.02886	0.996289	FALSE	1.96733
EMB	embC_A767A	embC	767	-0.114788	0.50464	-0.227466	0.820062	3	0.874306	-1.10388	0.97342	FALSE	1.96733
EMB	iniC_88_indel	iniC	88	-0.115579	0.685687	-0.168559	0.866143	2	1.22837	-1.45953	0.992948	FALSE	1.96733
EMB	embB_L278L	embB	278	-0.116154	0.480626	-0.241672	0.809035	3	0.825873	-1.05818	0.966035	FALSE	1.96733
EMB	embB_T850T	embB	850	-0.127823	0.606991	-0.210585	0.833211	3	1.06188	-1.31753	0.979389	FALSE	1.96733
EMB	20.siteid	SITEID	15	-0.133873	0.0761836	-1.75725	0.0788756	0	0.0154465	-0.283193	0.377476	FALSE	1.96733
EMB	iniC_R476C	iniC	476	-0.134449	0.384546	-0.349631	0.726616	83	0.61926	-0.888158	0.9528	FALSE	1.96733
EMB	iniA_V322V:embB_R1055R	iniA	322	-0.136424	0.255853	-0.533213	0.593886	25	0.365048	-0.637897	0.932921	FALSE	1.96733
EMB	ubiA_L270L	ubiA	270	-0.136636	0.385237	-0.354681	0.722829	6	0.618428	-0.8917	0.9528	FALSE	1.96733
EMB	iniA_1825_indel	iniA	1825	-0.138488	0.127699	-1.08449	0.278149	63	0.111802	-0.388777	0.794899	FALSE	1.96733
EMB	embA_D305G	embA	305	-0.141735	0.922937	-0.15357	0.877949	1	1.66722	-1.95069	0.992948	FALSE	1.96733
EMB	embA_L278R	embA	278	-0.142407	0.839772	-0.169578	0.865342	1	1.50355	-1.78836	0.992948	FALSE	1.96733
EMB	embA_Q1004P	embA	1004	-0.150691	0.356431	-0.422777	0.672458	7	0.547914	-0.849295	0.938405	FALSE	1.96733
EMB	embC_K115K	embC	115	-0.154347	0.547934	-0.281689	0.778182	5	0.919604	-1.2283	0.953748	FALSE	1.96733
EMB	iniC_G331R	iniC	331	-0.154575	0.291969	-0.529421	0.596513	10	0.417685	-0.726834	0.932921	FALSE	1.96733
EMB	embB_D534D	embB	534	-0.156695	0.086452	-1.81251	0.0699074	286	0.0127508	-0.326141	0.351285	TRUE	1.96733
EMB	ubiA_L284L	ubiA	284	-0.159567	0.337332	-0.473025	0.636195	8	0.501604	-0.820737	0.93796	TRUE	1.96733
EMB	embA_G814G	embA	814	-0.161308	0.725162	-0.222444	0.823968	6	1.26001	-1.58263	0.974934	FALSE	1.96733
EMB	embC_H369H	embC	369	-0.161401	0.538401	-0.299778	0.764347	3	0.893865	-1.21667	0.953748	FALSE	1.96733
EMB	iniA_A197A	iniA	197	-0.163556	0.597818	-0.273589	0.7844	2	1.00817	-1.33528	0.955448	FALSE	1.96733
EMB	embB_V50A	embB	50	-0.164051	1.19375	-0.137424	0.890695	1	2.17571	-2.50381	0.99461	FALSE	1.96733
EMB	embA_A201A	embA	201	-0.164343	0.504706	-0.325621	0.744711	3	0.82488	-1.15357	0.953748	FALSE	1.96733
EMB	iniA_V33G	iniA	33	-0.164547	0.371299	-0.443166	0.657646	6	0.563199	-0.892293	0.938405	FALSE	1.96733
EMB	embC_Y296Y	embC	296	-0.16601	0.566351	-0.293123	0.769428	10	0.944038	-1.27606	0.953748	TRUE	1.96733
EMB	embC_S1022S	embC	1022	-0.168921	1.02615	-0.164617	0.869246	2	1.84232	-2.18016	0.992948	FALSE	1.96733
EMB	embC_R567H:embC_V104M	embC	567	-0.170744	0.201301	-0.8482	0.396327	28	0.223807	-0.565294	0.876322	FALSE	1.96733
EMB	iniA_I46L:embB_A553T	iniA	46	-0.173379	0.6055	-0.28634	0.774618	2	1.0134	-1.36016	0.953748	FALSE	1.96733
EMB	iniC_A450T	iniC	450	-0.173738	1.18678	-0.146394	0.88361	1	2.15235	-2.49983	0.992948	FALSE	1.96733
EMB	embA_V1064V	embA	1064	-0.179994	0.426406	-0.42212	0.672938	4	0.655761	-1.01575	0.938405	FALSE	1.96733
EMB	embA_D176E	embA	176	-0.180329	0.191707	-0.940647	0.346886	24	0.195417	-0.556074	0.863171	FALSE	1.96733
EMB	ubiA_T256T	ubiA	256	-0.184184	0.589747	-0.312311	0.754804	2	0.97172	-1.34009	0.953748	TRUE	1.96733
EMB	iniC_D166N	iniC	166	-0.188358	0.622093	-0.302782	0.762056	2	1.03094	-1.40766	0.953748	FALSE	1.96733
EMB	embA_A253A	embA	253	-0.18887	0.283162	-0.667004	0.50477	16	0.366127	-0.743867	0.925155	FALSE	1.96733
EMB	embA_c-34t	embA	-34	-0.189203	0.593737	-0.318665	0.749981	2	0.974521	-1.35293	0.953748	FALSE	1.96733
EMB	embA_A557T	embA	557	-0.194989	0.839488	-0.232272	0.816327	1	1.45041	-1.84039	0.970898	FALSE	1.96733
EMB	manB_G111G	manB	111	-0.198732	0.236841	-0.839093	0.401417	25	0.265477	-0.662941	0.87701	FALSE	1.96733
EMB	embA_A985P	embA	985	-0.198847	0.505531	-0.393343	0.694066	3	0.791994	-1.18969	0.942046	FALSE	1.96733
EMB	embB_A1073A	embB	1073	-0.200033	0.128711	-1.55413	0.120154	58	0.0522401	-0.452307	0.521242	FALSE	1.96733
EMB	iniA_G178G	iniA	178	-0.204653	0.0769658	-2.65902	0.0078369	305	-0.0538003	-0.355506	0.0661458	TRUE	1.96733
EMB	embC_L171L	embC	171	-0.218818	0.838846	-0.260856	0.794203	1	1.42532	-1.86296	0.957935	FALSE	1.96733
EMB	embA_I155M	embA	155	-0.222182	0.468233	-0.47451	0.635136	9	0.695556	-1.13992	0.93796	FALSE	1.96733
EMB	4.siteid	SITEID	8	-0.226156	0.0650735	-3.47539	0.0005101	0	-0.0986115	-0.3537	0.00627735	FALSE	1.96733
EMB	embR_L194L	embR	194	-0.231249	0.850637	-0.271854	0.785735	1	1.436	-1.8985	0.955448	FALSE	1.96733
EMB	iniA_R606!	iniA	606	-0.233363	0.847958	-0.275206	0.783158	1	1.42863	-1.89536	0.955448	FALSE	1.96733
EMB	iniA_1561_indel	iniA	1561	-0.237985	0.584751	-0.406986	0.684018	2	0.908127	-1.3841	0.939713	FALSE	1.96733
EMB	iniC_488_indel	iniC	488	-0.238765	0.840677	-0.284015	0.776398	1	1.40896	-1.88649	0.953748	FALSE	1.96733
EMB	embC_V637I	embC	637	-0.245877	0.832967	-0.295182	0.767855	1	1.38674	-1.87849	0.953748	FALSE	1.96733
EMB	embC_G821S	embC	821	-0.251634	0.831974	-0.302454	0.762306	1	1.37903	-1.8823	0.953748	FALSE	1.96733
EMB	embC_M613V	embC	613	-0.261831	0.481009	-0.544337	0.586209	4	0.680947	-1.20461	0.93248	FALSE	1.96733
EMB	embC_P486T	embC	486	-0.262964	0.606048	-0.4339	0.664361	2	0.92489	-1.45082	0.938405	FALSE	1.96733
EMB	iniC_Y383H	iniC	383	-0.264522	0.337622	-0.783486	0.433342	9	0.397217	-0.92626	0.885255	FALSE	1.96733
EMB	embC_D793D	embC	793	-0.265729	0.303375	-0.875911	0.381078	8	0.328885	-0.860344	0.871261	FALSE	1.96733
EMB	embC_R897R	embC	897	-0.268565	0.860831	-0.311983	0.755053	1	1.41866	-1.95579	0.953748	FALSE	1.96733
EMB	manB_T40A	manB	40	-0.26859	0.832088	-0.32279	0.746854	1	1.3623	-1.89948	0.953748	FALSE	1.96733
EMB	iniA_E412K	iniA	412	-0.271929	0.606261	-0.448534	0.653768	2	0.916343	-1.4602	0.938405	FALSE	1.96733
EMB	embB_Q139H:embA_A201T	embB	139	-0.27607	0.350249	-0.788211	0.430573	6	0.410418	-0.962559	0.885255	FALSE	1.96733
EMB	embA_V396V:embA_V116V	embA	396	-0.276746	0.359878	-0.769	0.441893	41	0.428614	-0.982106	0.885255	TRUE	1.96733
EMB	embA_V676A	embA	676	-0.28742	0.822789	-0.349324	0.726846	1	1.32525	-1.90009	0.9528	FALSE	1.96733
EMB	iniA_L267L	iniA	267	-0.287963	0.518635	-0.555233	0.578735	3	0.728561	-1.30449	0.93248	FALSE	1.96733
EMB	embB_R173L	embB	173	-0.287994	0.848952	-0.339235	0.734433	1	1.37595	-1.95194	0.953748	FALSE	1.96733
EMB	iniA_T601T	iniA	601	-0.288422	0.595981	-0.483945	0.628425	3	0.8797	-1.45654	0.93796	FALSE	1.96733
EMB	14.siteid	SITEID	14	-0.293901	0.0858253	-3.4244	0.0006162	0	-0.125683	-0.462118	0.00743137	FALSE	1.96733
EMB	iniC_A324V	iniC	324	-0.299086	0.653693	-0.457532	0.647289	2	0.982153	-1.58032	0.938405	FALSE	1.96733
EMB	embB_S152S	embB	152	-0.299092	0.660004	-0.453167	0.650429	3	0.994516	-1.5927	0.938405	TRUE	1.96733
EMB	ubiA_W175G	ubiA	175	-0.3005	0.343337	-0.875232	0.381448	6	0.372441	-0.973441	0.871261	TRUE	1.96733
EMB	iniA_S501W	iniA	501	-0.302539	0.151533	-1.99652	0.0458769	87	-0.00553442	-0.599544	0.276638	TRUE	1.96733
EMB	embC_T270I:embB_E378A	embC	270	-0.303484	0.712429	-0.425984	0.670119	418	1.09288	-1.69984	0.938405	TRUE	1.96733
EMB	embB_G18G	embB	18	-0.305549	0.192388	-1.58819	0.112244	27	0.0715324	-0.682629	0.511159	TRUE	1.96733
EMB	ubiA_M128I	ubiA	128	-0.30651	0.839282	-0.365205	0.714958	1	1.33848	-1.9515	0.9528	FALSE	1.96733
EMB	embA_D235N	embA	235	-0.332079	0.849235	-0.391033	0.695773	1	1.33242	-1.99658	0.942046	FALSE	1.96733
EMB	embA_P933P	embA	933	-0.332079	0.849235	-0.391033	0.695773	1	1.33242	-1.99658	0.942046	FALSE	1.96733
EMB	rmlD_c-34g	rmlD	-34	-0.332079	0.441513	-0.752137	0.451968	4	0.533287	-1.19744	0.887506	FALSE	1.96733
EMB	embR_L239V	embR	239	-0.33376	0.966791	-0.345224	0.729926	3	1.56115	-2.22867	0.953748	FALSE	1.96733
EMB	iniC_G194A	iniC	194	-0.335267	0.732811	-0.457508	0.647306	2	1.10104	-1.77158	0.938405	FALSE	1.96733
EMB	rmlD_A237A	rmlD	237	-0.337086	0.840294	-0.401153	0.688308	1	1.30989	-1.98406	0.941156	FALSE	1.96733
EMB	embB_A913A	embB	913	-0.339933	0.829806	-0.409653	0.682061	1	1.28649	-1.96635	0.939713	FALSE	1.96733
EMB	embC_R518R	embC	518	-0.340026	0.715187	-0.475436	0.634476	2	1.06174	-1.74179	0.93796	FALSE	1.96733
EMB	iniA_L328L	iniA	328	-0.341316	0.348558	-0.979225	0.327469	7	0.341857	-1.02449	0.84601	FALSE	1.96733
EMB	embC_A597A	embC	597	-0.343676	0.849201	-0.404705	0.685694	1	1.32076	-2.00811	0.939713	FALSE	1.96733
EMB	embC_E667V	embC	667	-0.351242	0.606788	-0.578854	0.562688	2	0.838063	-1.54055	0.93248	FALSE	1.96733
EMB	iniA_D100G	iniA	100	-0.352787	0.838223	-0.420874	0.673847	1	1.29013	-1.9957	0.938405	FALSE	1.96733
EMB	iniA_A354E	iniA	354	-0.356253	0.607032	-0.586878	0.557286	2	0.833529	-1.54604	0.93248	FALSE	1.96733
EMB	iniC_R157C	iniC	157	-0.363015	0.492135	-0.737633	0.460738	3	0.60157	-1.3276	0.887619	TRUE	1.96733
EMB	embC_E187E	embC	187	-0.364288	0.840527	-0.433404	0.664721	1	1.28315	-2.01172	0.938405	FALSE	1.96733
EMB	embB_R372R	embB	372	-0.365237	0.862826	-0.423303	0.672074	1	1.3259	-2.05637	0.938405	FALSE	1.96733
EMB	rmlD_R7K	rmlD	7	-0.365237	0.862826	-0.423303	0.672074	1	1.3259	-2.05637	0.938405	FALSE	1.96733
EMB	iniA_R269C	iniA	269	-0.370929	0.684029	-0.54227	0.587632	2	0.969769	-1.71163	0.93248	TRUE	1.96733
EMB	embB_D1041D	embB	1041	-0.371519	0.733622	-0.506417	0.612564	2	1.06638	-1.80942	0.934688	FALSE	1.96733
EMB	embB_A102A	embB	102	-0.374485	0.605041	-0.618942	0.535955	2	0.811395	-1.56037	0.93248	FALSE	1.96733
EMB	iniA_H42R	iniA	42	-0.382912	0.646357	-0.592417	0.553572	11	0.883947	-1.64977	0.93248	FALSE	1.96733
EMB	iniC_1381_indel	iniC	1381	-0.386186	0.864692	-0.446616	0.655152	1	1.30861	-2.08098	0.938405	FALSE	1.96733
EMB	embB_A630A	embB	630	-0.386409	0.839094	-0.460508	0.645152	1	1.25821	-2.03103	0.938405	FALSE	1.96733
EMB	ubiA_V55A	ubiA	55	-0.398792	0.840121	-0.474684	0.635012	1	1.24785	-2.04543	0.93796	FALSE	1.96733
EMB	embC_V885M	embC	885	-0.39938	0.499504	-0.799552	0.42397	3	0.579649	-1.37841	0.881565	TRUE	1.96733
EMB	iniA_D277G	iniA	277	-0.417376	0.487739	-0.855738	0.392143	3	0.538591	-1.37334	0.876322	TRUE	1.96733
INH	Rv1258c_A367T	Rv1258c	367	-1.73321	0.659011	-2.63002	0.0085379	6	-0.441552	-3.02487	0.0492053	FALSE	2.12067
EMB	embC_T291T	embC	291	-0.41942	0.832323	-0.503915	0.614321	1	1.21193	-2.05077	0.934688	FALSE	1.96733
EMB	embB_Q853P	embB	853	-0.42022	0.346514	-1.2127	0.225243	11	0.258948	-1.09939	0.718631	FALSE	1.96733
EMB	iniA_D379D	iniA	379	-0.420913	0.838226	-0.502148	0.615564	1	1.22201	-2.06384	0.934688	FALSE	1.96733
EMB	embA_K167K	embA	167	-0.4237	0.606486	-0.698615	0.484793	2	0.765012	-1.61241	0.913331	FALSE	1.96733
EMB	embB_Q51P	embB	51	-0.4237	0.606492	-0.698608	0.484797	3	0.765024	-1.61242	0.913331	FALSE	1.96733
EMB	embR_L217V	embR	217	-0.427428	0.103015	-4.14919	3.34e-05	112	-0.225519	-0.629337	0.000503505	TRUE	1.96733
ETH	Rv3083_T130T	Rv3083	130	-1.92775	0.63517	-3.03501	0.0024053	2	-0.682812	-3.17268	0.0108347	FALSE	2.03817
EMB	embB_R947R	embB	947	-0.429879	0.486177	-0.884203	0.376587	6	0.523028	-1.38279	0.871261	TRUE	1.96733
EMB	embA_G596S	embA	596	-0.432834	1.03542	-0.418026	0.675928	2	1.5966	-2.46226	0.939135	FALSE	1.96733
EMB	embA_V206M	embA	206	-0.440061	0.332725	-1.3226	0.18597	271	0.21208	-1.0922	0.667498	TRUE	1.96733
EMB	embC_R877W	embC	877	-0.446779	0.601657	-0.742582	0.457735	2	0.732468	-1.62603	0.887506	FALSE	1.96733
EMB	iniA_T274A	iniA	274	-0.447963	0.842972	-0.531409	0.595135	2	1.20426	-2.10019	0.932921	TRUE	1.96733
EMB	embA_V911I	embA	911	-0.448607	0.838702	-0.534882	0.592731	6	1.19525	-2.09246	0.932921	FALSE	1.96733
EMB	iniC_L337P	iniC	337	-0.448607	0.606274	-0.739941	0.459336	2	0.73969	-1.6369	0.887619	FALSE	1.96733
EMB	embA_A483T	embA	483	-0.47317	0.491555	-0.962598	0.335749	3	0.490279	-1.43662	0.848205	TRUE	1.96733
EMB	embC_V860V	embC	860	-0.480248	0.607693	-0.790281	0.429364	2	0.710829	-1.67133	0.885255	FALSE	1.96733
EMB	iniC_H457Y	iniC	457	-0.481737	0.697361	-0.6908	0.489691	2	0.88509	-1.84856	0.913331	FALSE	1.96733
EMB	embA_A409P	embA	409	-0.491132	0.593645	-0.827316	0.408058	2	0.672412	-1.65468	0.878782	FALSE	1.96733
EMB	embB_V49V	embB	49	-0.491735	0.44587	-1.10287	0.270085	4	0.382171	-1.36564	0.783818	FALSE	1.96733
EMB	embB_S203L	embB	203	-0.496184	0.325113	-1.52619	0.126963	9	0.141038	-1.13341	0.535375	FALSE	1.96733
EMB	embA_G275S	embA	275	-0.498162	0.8387	-0.593969	0.552533	1	1.14569	-2.14201	0.93248	FALSE	1.96733
EMB	embB_A30T	embB	30	-0.498162	0.8387	-0.593969	0.552533	3	1.14569	-2.14201	0.93248	FALSE	1.96733
EMB	embB_P824L	embB	824	-0.498162	0.606329	-0.821603	0.411303	2	0.690243	-1.68657	0.881265	FALSE	1.96733
EMB	iniA_Q223!	iniA	223	-0.498162	0.8387	-0.593969	0.552533	1	1.14569	-2.14201	0.93248	FALSE	1.96733
EMB	ubiA_A204A	ubiA	204	-0.498162	0.8387	-0.593969	0.552533	1	1.14569	-2.14201	0.93248	FALSE	1.96733
EMB	embC_L248L	embC	248	-0.499794	0.584644	-0.854869	0.392624	2	0.646108	-1.6457	0.876322	FALSE	1.96733
EMB	iniA_E282E	iniA	282	-0.504218	0.425314	-1.18552	0.235811	4	0.329396	-1.33783	0.736758	FALSE	1.96733
EMB	embC_V473V	embC	473	-0.507139	0.489709	-1.03559	0.300393	3	0.452692	-1.46697	0.812274	FALSE	1.96733
EMB	iniC_D73D	iniC	73	-0.507139	0.489709	-1.03559	0.300393	3	0.452692	-1.46697	0.812274	FALSE	1.96733
EMB	manB_D124N	manB	124	-0.508778	0.684557	-0.743222	0.457347	3	0.832954	-1.85051	0.887506	FALSE	1.96733
EMB	embB_A338T	embB	338	-0.509006	0.60566	-0.840415	0.400676	2	0.678087	-1.6961	0.87701	FALSE	1.96733
EMB	embR_G129D	embR	129	-0.509885	0.832581	-0.612415	0.540263	1	1.12197	-2.14174	0.93248	FALSE	1.96733
EMB	embC_C429G	embC	429	-0.510021	0.601828	-0.847453	0.396743	3	0.669562	-1.6896	0.876322	FALSE	1.96733
EMB	iniA_A150A	iniA	150	-0.525931	0.946509	-0.555653	0.578448	1	1.32923	-2.38109	0.93248	FALSE	1.96733
EMB	embA_P1082L	embA	1082	-0.532666	0.839197	-0.634733	0.525603	1	1.11216	-2.17749	0.93248	FALSE	1.96733
EMB	embC_V648V	embC	648	-0.532666	0.594481	-0.896018	0.370243	2	0.632518	-1.69785	0.871261	FALSE	1.96733
EMB	iniC_Q16Q	iniC	16	-0.532666	0.839197	-0.634733	0.525603	1	1.11216	-2.17749	0.93248	FALSE	1.96733
EMB	iniC_H86R	iniC	86	-0.532666	0.607016	-0.877515	0.380207	2	0.657086	-1.72242	0.871261	FALSE	1.96733
EMB	manB_L88L	manB	88	-0.532666	0.42623	-1.24971	0.211404	5	0.302746	-1.36808	0.704292	FALSE	1.96733
EMB	embA_D865N	embA	865	-0.536644	0.838766	-0.639802	0.522301	1	1.10734	-2.18063	0.93248	FALSE	1.96733
EMB	embB_A601A:embA_V531L	embB	601	-0.536644	0.60642	-0.884938	0.37619	2	0.651938	-1.72523	0.871261	FALSE	1.96733
EMB	embB_V618M	embB	618	-0.536644	0.838766	-0.639802	0.522301	1	1.10734	-2.18063	0.93248	FALSE	1.96733
EMB	iniC_I205I	iniC	205	-0.536644	0.838766	-0.639802	0.522301	2	1.10734	-2.18063	0.93248	TRUE	1.96733
EMB	iniC_A333T	iniC	333	-0.536644	0.60642	-0.884938	0.37619	2	0.651938	-1.72523	0.871261	FALSE	1.96733
EMB	embB_A313V	embB	313	-0.539708	0.419865	-1.28543	0.198641	4	0.283227	-1.36264	0.694314	FALSE	1.96733
EMB	iniA_S618S	iniA	618	-0.548749	0.651861	-0.841819	0.399889	3	0.728899	-1.8264	0.87701	TRUE	1.96733
EMB	rmlD_A115T	rmlD	115	-0.550811	0.284218	-1.93799	0.052625	11	0.00625706	-1.10788	0.293307	FALSE	1.96733
EMB	embA_R472R	embA	472	-0.552649	0.682247	-0.810043	0.417916	2	0.784555	-1.88985	0.881265	FALSE	1.96733
EMB	embB_D345D:embA_V31A	embB	345	-0.557423	0.688235	-0.809931	0.41798	3	0.791517	-1.90636	0.881265	FALSE	1.96733
EMB	iniA_1762_indel	iniA	1762	-0.559625	0.603251	-0.927683	0.353572	2	0.622746	-1.742	0.871261	FALSE	1.96733
EMB	embA_A60A	embA	60	-0.572584	0.507984	-1.12717	0.259671	3	0.423065	-1.56823	0.771788	FALSE	1.96733
EMB	rmlD_G110G	rmlD	110	-0.6053	0.48635	-1.24458	0.213288	3	0.347947	-1.55855	0.706662	FALSE	1.96733
EMB	embA_V216V	embA	216	-0.627823	0.840169	-0.747258	0.454908	1	1.01891	-2.27456	0.887506	FALSE	1.96733
EMB	manB_G325G	manB	325	-0.629325	0.546934	-1.15064	0.24988	3	0.442665	-1.70132	0.757173	FALSE	1.96733
EMB	embB_A453A:embA_V122V	embB	453	-0.631186	0.343687	-1.83651	0.0662821	8	0.0424415	-1.30481	0.344553	FALSE	1.96733
EMB	iniA_516_indel	iniA	516	-0.641968	0.593813	-1.08109	0.279655	2	0.521905	-1.80584	0.795433	FALSE	1.96733
EMB	ubiA_M180T	ubiA	180	-0.652452	0.491597	-1.32721	0.18444	3	0.311079	-1.61598	0.667498	FALSE	1.96733
EMB	6.siteid	SITEID	10	-0.658181	0.060523	-10.8749	0	0	-0.539556	-0.776806	0	FALSE	1.96733
EMB	embB_G100S	embB	100	-0.663311	0.673843	-0.98437	0.324933	2	0.657422	-1.98404	0.84601	FALSE	1.96733
EMB	embR_T275T	embR	275	-0.669071	0.605861	-1.10433	0.269449	2	0.518416	-1.85656	0.783818	FALSE	1.96733
EMB	embB_G156D	embB	156	-0.669832	0.610602	-1.097	0.27264	2	0.526947	-1.86661	0.786612	FALSE	1.96733
EMB	iniC_Q351!	iniC	351	-0.686323	0.592875	-1.15762	0.24702	2	0.475712	-1.84836	0.752287	TRUE	1.96733
EMB	iniC_I220I	iniC	220	-0.691343	0.89214	-0.774927	0.438383	1	1.05725	-2.43994	0.885255	FALSE	1.96733
EMB	embA_A84S	embA	84	-0.699861	0.345309	-2.02677	0.0426859	6	-0.0230563	-1.37667	0.259996	FALSE	1.96733
EMB	embA_A331T	embA	331	-0.704435	0.606119	-1.16221	0.245152	2	0.483559	-1.89243	0.750389	FALSE	1.96733
ETH	Rv3083_356_indel	Rv3083	356	-1.93472	0.636959	-3.03743	0.002386	2	-0.686282	-3.18316	0.0108347	FALSE	2.03817
EMB	embA_G86V	embA	86	-0.737425	0.606912	-1.21504	0.224349	2	0.452122	-1.92697	0.718631	FALSE	1.96733
EMB	manB_N96H:iniC_172_indel	manB	96	-0.737425	0.839122	-0.878805	0.379507	2	0.907254	-2.3821	0.871261	FALSE	1.96733
EMB	manB_D292D:embC_V987A	manB	292	-0.737425	0.839122	-0.878805	0.379507	1	0.907254	-2.3821	0.871261	FALSE	1.96733
EMB	iniA_V514A	iniA	514	-0.738282	0.831519	-0.887871	0.37461	1	0.891496	-2.36806	0.871261	FALSE	1.96733
EMB	embC_T1044P	embC	1044	-0.739344	0.839596	-0.880595	0.378537	1	0.906264	-2.38495	0.871261	FALSE	1.96733
EMB	embR_A70T	embR	70	-0.748068	0.616806	-1.21281	0.225203	2	0.460872	-1.95701	0.718631	FALSE	1.96733
EMB	iniC_A74G	iniC	74	-0.74879	0.54628	-1.37071	0.170466	3	0.321919	-1.8195	0.642445	FALSE	1.96733
EMB	8.siteid	SITEID	11	-0.760737	0.0602785	-12.6204	0	0	-0.642591	-0.878883	0	FALSE	1.96733
EMB	embR_V276M	embR	276	-0.762964	0.839488	-0.908845	0.363432	1	0.882433	-2.40836	0.871261	FALSE	1.96733
EMB	embC_L971L:embA_V1073I	embC	971	-0.771929	0.507234	-1.52184	0.12805	3	0.222251	-1.76611	0.536207	FALSE	1.96733
LEV	gyrA_R441R	gyrA	441	-1.97386	0.706368	-2.79438	0.0052	5	-0.589376	-3.35834	0.0371027	FALSE	1.5799
EMB	ubiA_V96M	ubiA	96	-0.792782	0.624564	-1.26934	0.204321	8	0.431363	-2.01693	0.696076	FALSE	1.96733
EMB	manB_L254M	manB	254	-0.799968	0.878432	-0.910678	0.362465	1	0.921758	-2.5217	0.871261	FALSE	1.96733
EMB	embC_G368G	embC	368	-0.802721	0.50951	-1.57547	0.115147	3	0.195919	-1.80136	0.511609	FALSE	1.96733
EMB	embB_S347I	embB	347	-0.8229	1.08495	-0.758466	0.448172	1	1.30361	-2.94941	0.886058	FALSE	1.96733
EMB	embA_R11W	embA	11	-0.824783	1.02935	-0.801267	0.422977	1	1.19274	-2.8423	0.881565	FALSE	1.96733
EMB	ubiA_A38S	ubiA	38	-0.83139	0.823406	-1.0097	0.31264	1	0.782485	-2.44526	0.83524	FALSE	1.96733
EMB	embR_L138L	embR	138	-0.839981	0.839353	-1.00075	0.316949	1	0.805152	-2.48511	0.838246	FALSE	1.96733
EMB	iniA_L380L	iniA	380	-0.8428	1.24831	-0.675154	0.499578	1	1.60388	-3.28948	0.918432	FALSE	1.96733
EMB	embB_A852A	embB	852	-0.844528	0.841848	-1.00318	0.315772	1	0.805494	-2.49455	0.838246	FALSE	1.96733
EMB	embA_A1015A	embA	1015	-0.845184	0.489246	-1.72753	0.0840733	4	0.113737	-1.80411	0.399183	TRUE	1.96733
EMB	iniC_V348M	iniC	348	-0.862071	0.473214	-1.82174	0.0684949	4	0.065428	-1.78957	0.350021	FALSE	1.96733
EMB	embA_P752L	embA	752	-0.874485	0.838761	-1.04259	0.297138	1	0.769487	-2.51846	0.812274	FALSE	1.96733
EMB	embC_A977A	embC	977	-0.874485	0.838761	-1.04259	0.297138	1	0.769487	-2.51846	0.812274	FALSE	1.96733
EMB	iniC_L407W	iniC	407	-0.874485	0.838761	-1.04259	0.297138	1	0.769487	-2.51846	0.812274	FALSE	1.96733
EMB	embB_L220L	embB	220	-0.887367	0.977665	-0.907639	0.364069	5	1.02886	-2.80359	0.871261	FALSE	1.96733
EMB	iniA_281_indel	iniA	281	-0.889448	0.337304	-2.63693	0.0083659	10	-0.228333	-1.55056	0.0681708	FALSE	1.96733
EMB	embB_R351R	embB	351	-0.896925	0.593781	-1.51053	0.130907	2	0.266885	-2.06073	0.544394	FALSE	1.96733
EMB	embA_T100T	embA	100	-0.93598	0.849187	-1.10221	0.270372	4	0.728427	-2.60039	0.783818	TRUE	1.96733
EMB	embA_L536L	embA	536	-0.956116	0.877164	-1.09001	0.275709	1	0.763125	-2.67536	0.79168	FALSE	1.96733
EMB	3.siteid	SITEID	7	-0.996022	0.0576499	-17.2771	0	0	-0.883028	-1.10902	0	FALSE	1.96733
EMB	iniA_N88S	iniA	88	-0.998931	1.50401	-0.664177	0.506577	10	1.94893	-3.9468	0.925655	TRUE	1.96733
LEV	gyrA_R607H	gyrA	607	-2.01617	0.531178	-3.79565	0.0001473	3	-0.975058	-3.05727	0.00144027	FALSE	1.5799
EMB	embB_R464R	embB	464	-1.05963	0.846333	-1.25202	0.210563	1	0.599188	-2.71844	0.704292	FALSE	1.96733
EMB	embA_2602_indel	embA	2602	-1.06003	0.416874	-2.54281	0.0109966	4	-0.242957	-1.8771	0.0875961	TRUE	1.96733
EMB	embB_A386A	embB	386	-1.17338	0.598047	-1.96202	0.0497606	2	-0.0012061	-2.34555	0.285768	FALSE	1.96733
EMB	manB_A95T	manB	95	-1.17338	0.841727	-1.39401	0.163314	1	0.476406	-2.82316	0.623279	FALSE	1.96733
EMB	embR_P33P	embR	33	-1.19093	0.860669	-1.38373	0.166442	2	0.49598	-2.87784	0.631223	FALSE	1.96733
EMB	iniA_D549E:embA_T308A	iniA	549	-1.21169	1.32162	-0.916823	0.359235	4	1.37868	-3.80206	0.871261	FALSE	1.96733
EMB	embB_L370R	embB	370	-1.24766	0.5911	-2.11075	0.0347941	2	-0.0891062	-2.40622	0.220851	FALSE	1.96733
EMB	embC_N973N	embC	973	-1.26809	0.965119	-1.31392	0.188874	3	0.623546	-3.15972	0.673363	TRUE	1.96733
EMB	iniA_V106A	iniA	106	-1.32488	0.865346	-1.53103	0.125761	18	0.371204	-3.02095	0.534898	FALSE	1.96733
EMB	embB_R213Q	embB	213	-1.3976	0.847949	-1.64821	0.09931	1	0.264384	-3.05958	0.464217	FALSE	1.96733
EMB	embR_S30S	embR	30	-1.49816	0.8387	-1.78629	0.0740523	1	0.14569	-3.14201	0.363037	FALSE	1.96733
EMB	embR_t-94c	embR	-94	-1.53267	0.839197	-1.82635	0.0677979	1	0.112161	-3.17749	0.34942	FALSE	1.96733
EMB	iniC_M312K	iniC	312	-1.55131	0.731919	-2.11952	0.0340467	2	-0.116755	-2.98588	0.219538	FALSE	1.96733
EMB	embC_A726G	embC	726	-1.57437	0.873826	-1.80169	0.071594	1	0.138335	-3.28706	0.356787	FALSE	1.96733
EMB	embA_A103S	embA	103	-1.66017	1.03764	-1.59995	0.10961	2	0.373607	-3.69395	0.504543	FALSE	1.96733
EMB	manB_V323M	manB	323	-1.79296	0.846763	-2.11743	0.0342232	1	-0.133308	-3.45262	0.219538	FALSE	1.96733
EMB	embB_G199R	embB	199	-1.91037	0.616396	-3.09926	0.00194	2	-0.702237	-3.11851	0.0197673	TRUE	1.96733
EMB	ubiA_R76R:embB_E378A:embC_T270I:iniA_H481Q:rmlD_S257P	ubiA	76	-2.55024	6.61393	-0.385587	0.699803	411	10.4131	-15.5136	0.943416	TRUE	1.96733
BDQ	Rv0678_L40V	Rv0678	40	-2.04166	0.389408	-5.24298	1.58e-07	11	-1.27842	-2.8049	2.23988e-06	FALSE	2.99834
EMB	embB_T1032T	embB	1032	-3.23078	6.72093	-0.480704	0.630727	1	9.94225	-16.4038	0.93796	FALSE	1.96733
RIF	rpoA_R182L	rpoA	182	-2.07087	0.707703	-2.92619	0.0034314	6	-0.683777	-3.45797	0.028834	FALSE	3.27289
EMB	embR_Q379R:embA_A159S	embR	379	-3.80193	6.66845	-0.570137	0.568585	1	9.26823	-16.8721	0.93248	FALSE	1.96733
ETH	ethA_T314A:mshA_830_indel	ethA	314	6	1.69678	3.53611	0.0004061	1	9.32569	2.67431	0.00233391	FALSE	2.03817
ETH	ethA_C131!	ethA	131	4.94498	1.51453	3.26502	0.0010946	1	7.91346	1.97649	0.00558469	TRUE	2.03817
ETH	Rv3083_463_indel	Rv3083	463	4.89672	1.38887	3.52569	0.0004224	2	7.61891	2.17453	0.0024	FALSE	2.03817
ETH	Rv3083_A197V	Rv3083	197	4.82705	1.49186	3.2356	0.0012139	1	7.75109	1.90301	0.00600941	FALSE	2.03817
ETH	ethA_1408_indel	ethA	1408	4.82705	1.08245	4.45939	8.22e-06	2	6.94865	2.70546	8.38776e-05	FALSE	2.03817
ETH	ethA_T88P	ethA	88	4.4394	0.678866	6.53943	6.18e-11	2	5.76997	3.10882	1.47143e-09	TRUE	2.03817
ETH	ethA_W45!	ethA	45	3.97932	1.49278	2.66571	0.0076825	1	6.90516	1.05348	0.0297771	FALSE	2.03817
ETH	ethA_L136R	ethA	136	3.96501	0.930396	4.26163	2.03e-05	2	5.78859	2.14143	0.00017807	TRUE	2.03817
ETH	ethA_1334_indel	ethA	1334	3.8922	1.7458	2.22946	0.0257831	1	7.31396	0.47043	0.0805722	FALSE	2.03817
ETH	ethA_G11D	ethA	11	3.86618	1.5171	2.5484	0.010822	1	6.8397	0.892656	0.03865	TRUE	2.03817
ETH	ethA_568_indel	ethA	568	3.82012	0.72584	5.26304	1.42e-07	2	5.24277	2.39748	1.91892e-06	TRUE	2.03817
ETH	ethA_G184D	ethA	184	3.63339	1.52373	2.38454	0.0171003	1	6.61989	0.646887	0.0566235	TRUE	2.03817
ETH	ethA_L134R	ethA	134	3.63136	1.50872	2.40693	0.0160875	1	6.58845	0.674283	0.053625	TRUE	2.03817
ETH	ethA_S55P	ethA	55	3.49886	1.05176	3.32667	0.0008789	2	5.56031	1.43741	0.004675	TRUE	2.03817
ETH	ethA_D396G	ethA	396	3.47593	0.807023	4.3071	1.65e-05	2	5.05769	1.89416	0.000147321	TRUE	2.03817
ETH	ethA_674_indel	ethA	674	3.34194	1.50736	2.21709	0.0266172	1	6.29635	0.38752	0.0821519	TRUE	2.03817
ETH	ethA_L35R:Rv0565c_439_indel	ethA	35	3.30448	0.447348	7.38681	1.5e-13	9	4.18128	2.42767	4.6875e-12	FALSE	2.03817
ETH	ethA_584_indel	ethA	584	3.2114	0.865961	3.70848	0.0002085	1	4.90868	1.51411	0.00133654	FALSE	2.03817
ETH	ethA_H102P	ethA	102	3.20504	0.663117	4.83329	1.34e-06	2	4.50474	1.90533	1.55814e-05	TRUE	2.03817
ETH	ethA_W289!	ethA	289	3.193	0.762192	4.18924	2.8e-05	2	4.6869	1.69911	0.000233333	TRUE	2.03817
ETH	ethA_V118G	ethA	118	3.18483	1.27071	2.50634	0.0121987	3	5.67541	0.694242	0.0423566	TRUE	2.03817
ETH	ethA_744_indel	ethA	744	3.03851	1.42817	2.12756	0.0333736	2	5.83772	0.239304	0.0993262	FALSE	2.03817
ETH	ethA_367_indel	ethA	367	3.03733	0.467145	6.5019	7.93e-11	7	3.95293	2.12173	1.72391e-09	TRUE	2.03817
ETH	ethA_367_indel	ethA	367	3.03733	0.467145	6.5019	7.93e-11	7	3.95293	2.12173	1.72391e-09	TRUE	2.03817
ETH	ethA_Q206P	ethA	206	2.94195	0.868586	3.38706	0.0007065	1	4.64438	1.23952	0.00388187	FALSE	2.03817
ETH	ethA_Q254!	ethA	254	2.92088	1.51116	1.93288	0.0532514	1	5.88275	-0.0409877	0.144705	TRUE	2.03817
ETH	ethA_G43S:Rv3083_P382L	ethA	43	2.91065	0.866921	3.35746	0.0007866	1	4.60982	1.21149	0.00422903	FALSE	2.03817
ETH	ethA_P164L	ethA	164	2.88538	0.662174	4.35743	1.32e-05	2	4.18324	1.58752	0.000124528	TRUE	2.03817
ETH	ethA_49_indel	ethA	49	2.88262	0.658221	4.37941	1.19e-05	3	4.17273	1.5925	0.000114423	FALSE	2.03817
ETH	fabG1_c-15t	fabG1	-15	2.85949	0.0487519	58.654	0	810	2.95505	2.76394	0	TRUE	2.03817
ETH	fabG1_t-8g	fabG1	-8	2.85625	0.489589	5.83397	5.41e-09	4	3.81584	1.89665	8.45312e-08	TRUE	2.03817
ETH	Rv0565c_M401T	Rv0565c	401	2.85027	1.54483	1.84504	0.0650319	1	5.87815	-0.177596	0.172042	FALSE	2.03817
ETH	ethA_W21R	ethA	21	2.82705	0.923496	3.06125	0.0022041	1	4.6371	1.017	0.0102042	FALSE	2.03817
ETH	ethA_196_indel	ethA	196	2.81508	0.512838	5.48923	4.04e-08	5	3.82025	1.80992	5.61111e-07	TRUE	2.03817
ETH	ethA_196_indel	ethA	196	2.81508	0.512838	5.48923	4.04e-08	5	3.82025	1.80992	5.61111e-07	TRUE	2.03817
ETH	ethA_1113_indel	ethA	1113	2.80958	0.607671	4.62352	3.77e-06	3	4.00061	1.61854	4.01064e-05	TRUE	2.03817
ETH	mshA_G67A	mshA	67	2.78306	0.923613	3.01323	0.0025848	1	4.59334	0.972776	0.0114372	FALSE	2.03817
ETH	fabG1_L203L	fabG1	203	2.77171	0.119804	23.1353	0	109	3.00652	2.53689	0	TRUE	2.03817
ETH	ethA_66_indel	ethA	66	2.76644	0.765345	3.61463	0.0003008	4	4.26652	1.26637	0.00176941	FALSE	2.03817
ETH	fabG1_V221V	fabG1	221	2.70781	0.74708	3.62452	0.0002895	10	4.17209	1.24353	0.00172321	TRUE	2.03817
ETH	ethA_861_indel	ethA	861	2.70126	0.546244	4.94515	7.61e-07	3	3.7719	1.63062	9.28049e-06	TRUE	2.03817
ETH	ethA_Y147!	ethA	147	2.69189	0.521443	5.16238	2.44e-07	3	3.71392	1.66986	3.21053e-06	FALSE	2.03817
ETH	inhA_S94A	inhA	94	2.60116	0.205358	12.6665	0	32	3.00366	2.19866	0	TRUE	2.03817
ETH	ethA_Y211C	ethA	211	2.58841	0.648276	3.99276	6.53e-05	2	3.85903	1.31779	0.000459859	TRUE	2.03817
ETH	ethA_C137R	ethA	137	2.55915	0.353328	7.243	4.39e-13	7	3.25167	1.86663	1.29118e-11	TRUE	2.03817
ETH	ethA_758_indel	ethA	758	2.55548	0.391875	6.52116	6.98e-11	5	3.32356	1.78741	1.58636e-09	TRUE	2.03817
ETH	ethA_129_indel	ethA	129	2.54384	0.642317	3.96041	7.48e-05	2	3.80278	1.28489	0.000512329	FALSE	2.03817
ETH	ethA_T44A	ethA	44	2.5283	1.07669	2.34822	0.0188635	2	4.63862	0.417989	0.0612451	TRUE	2.03817
ETH	ethA_W391!	ethA	391	2.49251	0.335128	7.43751	1.03e-13	7	3.14936	1.83566	3.43333e-12	TRUE	2.03817
ETH	fabG1_c-34g	fabG1	-34	2.48391	0.617224	4.02433	5.71e-05	4	3.69367	1.27415	0.000413768	FALSE	2.03817
ETH	fabG1_A225A	fabG1	225	2.39694	1.31569	1.82182	0.0684828	2	4.97568	-0.181806	0.178341	FALSE	2.03817
ETH	ethA_R207S	ethA	207	2.39043	0.648433	3.68647	0.0002274	2	3.66136	1.1195	0.00140679	TRUE	2.03817
ETH	Rv0565c_P288S	Rv0565c	288	2.38499	1.07174	2.22534	0.0260583	2	4.4856	0.284378	0.0809264	FALSE	2.03817
ETH	ethA_T321P	ethA	321	2.35152	0.293179	8.02075	1.11e-15	27	2.92615	1.77689	4.26923e-14	TRUE	2.03817
ETH	ethA_L478R	ethA	478	2.32614	0.923791	2.51803	0.0118012	1	4.13677	0.515506	0.0415535	TRUE	2.03817
ETH	ethA_Y147S	ethA	147	2.29865	0.886209	2.5938	0.0094922	3	4.03562	0.561678	0.0354187	FALSE	2.03817
ETH	ethA_S399!	ethA	399	2.28902	0.392159	5.83696	5.32e-09	27	3.05765	1.52038	8.45312e-08	TRUE	2.03817
ETH	Rv3083_L330P	Rv3083	330	2.2428	1.53518	1.46094	0.144033	1	5.25176	-0.766153	0.298823	TRUE	2.03817
ETH	Rv3083_A426A	Rv3083	426	2.20988	1.29819	1.70228	0.0887032	1	4.75432	-0.334571	0.213229	FALSE	2.03817
ETH	ethA_753_indel	ethA	753	2.19822	0.274391	8.01129	1.11e-15	15	2.73603	1.66042	4.26923e-14	TRUE	2.03817
ETH	ethA_A341V	ethA	341	2.15953	0.318795	6.77403	1.25e-11	10	2.78437	1.53469	3.28947e-10	TRUE	2.03817
ETH	ethA_Q359!	ethA	359	2.15669	0.521474	4.13576	3.54e-05	3	3.17878	1.1346	0.000272308	TRUE	2.03817
ETH	ethA_P454L	ethA	454	2.14028	0.625281	3.42292	0.0006195	4	3.36584	0.914734	0.00344167	TRUE	2.03817
ETH	ethA_1308_indel	ethA	1308	2.11791	0.568213	3.72732	0.0001935	3	3.23161	1.00421	0.00125649	TRUE	2.03817
ETH	ethA_1308_indel	ethA	1308	2.11791	0.568213	3.72732	0.0001935	3	3.23161	1.00421	0.00125649	TRUE	2.03817
ETH	ethA_Y369C	ethA	369	2.10641	1.05218	2.00194	0.0452914	2	4.16868	0.0441273	0.125114	TRUE	2.03817
ETH	ethA_L225H	ethA	225	2.09756	0.89313	2.34855	0.0188468	1	3.84809	0.347023	0.0612451	FALSE	2.03817
ETH	ethA_1243_indel	ethA	1243	2.05254	0.32124	6.38943	1.67e-10	10	2.68217	1.42291	3.21154e-09	TRUE	2.03817
ETH	ethA_G182C	ethA	182	2.05148	0.717963	2.85736	0.0042718	2	3.45869	0.644271	0.0176521	FALSE	2.03817
ETH	ethA_S399L	ethA	399	2.03841	0.46333	4.39947	1.09e-05	4	2.94653	1.13028	0.000106863	TRUE	2.03817
ETH	ethA_1035_indel	ethA	1035	2.03633	0.55246	3.68593	0.0002279	3	3.11915	0.953508	0.00140679	FALSE	2.03817
ETH	ethA_E132!	ethA	132	2.02236	1.49477	1.35296	0.176069	1	4.95211	-0.907386	0.349342	TRUE	2.03817
ETH	ethA_F282V	ethA	282	2.01777	0.622608	3.24083	0.0011918	2	3.23808	0.797455	0.005959	TRUE	2.03817
ETH	ethA_A341E	ethA	341	2.0098	0.874035	2.29945	0.0214792	1	3.72291	0.296694	0.0688436	TRUE	2.03817
ETH	Rv0565c_1055_indel	Rv0565c	1055	2	1.21936	1.64021	0.100962	3	4.38994	-0.389942	0.233708	FALSE	2.03817
ETH	ethA_Q254P	ethA	254	1.99628	0.461544	4.32521	1.52e-05	5	2.9009	1.09165	0.000140741	TRUE	2.03817
ETH	ethA_T232A	ethA	232	1.98168	0.940396	2.10729	0.0350929	1	3.82486	0.138507	0.103243	FALSE	2.03817
ETH	fabG1_L85V	fabG1	85	1.97566	1.08043	1.82859	0.0674609	2	4.09331	-0.141979	0.176599	FALSE	2.03817
ETH	Rv3083_W460R	Rv3083	460	1.97092	0.698196	2.82287	0.0047596	2	3.33938	0.602454	0.0195066	FALSE	2.03817
ETH	ethA_M204V	ethA	204	1.96756	1.49251	1.31829	0.187407	1	4.89287	-0.957758	0.36254	FALSE	2.03817
ETH	fabG1_g-17t	fabG1	-17	1.96149	0.135367	14.4901	0	151	2.22681	1.69617	0	TRUE	2.03817
ETH	ethA_F48S	ethA	48	1.95115	1.08133	1.8044	0.0711688	2	4.07055	-0.168257	0.181553	FALSE	2.03817
ETH	Rv3083_R112P	Rv3083	112	1.93493	1.51888	1.27392	0.202693	1	4.91193	-1.04208	0.385348	FALSE	2.03817
ETH	ethA_P288S	ethA	288	1.93464	1.50892	1.28213	0.199797	1	4.89212	-1.02285	0.382752	TRUE	2.03817
ETH	mshA_1213_indel:Rv3083_V376A	mshA	1213	1.91042	0.748035	2.55392	0.0106517	2	3.37657	0.444275	0.0383155	FALSE	2.03817
ETH	ethR_S131R:ethA_G343V	ethR	131	1.89577	0.602414	3.14696	0.0016498	3	3.0765	0.71504	0.00800874	FALSE	2.03817
ETH	ethA_Y211S	ethA	211	1.89458	0.735674	2.5753	0.0100153	5	3.3365	0.452662	0.0362873	FALSE	2.03817
ETH	mshA_S352H:ethA_Y60N	mshA	352	1.89218	0.677543	2.79271	0.0052269	2	3.22016	0.564195	0.0210532	FALSE	2.03817
ETH	ethA_282_indel	ethA	282	1.87021	0.787489	2.3749	0.0175537	2	3.41369	0.326729	0.0577424	FALSE	2.03817
ETH	ethA_1392_indel	ethA	1392	1.85679	0.404956	4.58516	4.54e-06	14	2.6505	1.06307	4.72917e-05	TRUE	2.03817
ETH	mshA_563_indel:ethA_I94S	mshA	563	1.84453	0.64149	2.87539	0.0040353	2	3.10185	0.587213	0.016955	FALSE	2.03817
ETH	ethA_I9T	ethA	9	1.8442	0.438443	4.20624	2.6e-05	4	2.70354	0.984849	0.000220339	TRUE	2.03817
ETH	ethA_1055_indel	ethA	1055	1.83923	0.506904	3.62837	0.0002852	6	2.83277	0.845703	0.00171807	TRUE	2.03817
ETH	fabG1_t-8a	fabG1	-8	1.81786	0.296717	6.12657	8.98e-10	33	2.39942	1.23629	1.66296e-08	TRUE	2.03817
ETH	ethA_S390F	ethA	390	1.81667	0.275308	6.59868	4.15e-11	16	2.35628	1.27707	1.0375e-09	TRUE	2.03817
ETH	ethA_Y32D	ethA	32	1.81217	0.384996	4.70699	2.51e-06	16	2.56677	1.05758	2.85227e-05	FALSE	2.03817
ETH	ethA_N379K	ethA	379	1.80403	0.408458	4.41668	1e-05	13	2.60461	1.00345	0.0001	FALSE	2.03817
ETH	ethA_943_indel	ethA	943	1.79774	0.627738	2.86383	0.0041855	2	3.0281	0.567369	0.0174396	TRUE	2.03817
ETH	inhA_F41S	inhA	41	1.78915	1.07481	1.66462	0.0959894	2	3.89577	-0.317482	0.224274	FALSE	2.03817
ETH	ethA_Q269!	ethA	269	1.77411	1.52055	1.16676	0.243308	1	4.75439	-1.20616	0.445619	FALSE	2.03817
ETH	Rv3083_G328D	Rv3083	328	1.76628	0.682787	2.58686	0.0096854	2	3.10454	0.428015	0.0358719	FALSE	2.03817
ETH	ethA_386_indel	ethA	386	1.76291	0.439182	4.01408	5.97e-05	4	2.62371	0.902117	0.000426429	TRUE	2.03817
ETH	fabG1_t-8c	fabG1	-8	1.75441	0.171736	10.2158	0	54	2.09101	1.41781	0	TRUE	2.03817
ETH	ethA_M1R	ethA	1	1.74074	0.29014	5.99966	1.98e-09	18	2.30942	1.17207	3.41379e-08	TRUE	2.03817
ETH	ethA_Y50C	ethA	50	1.73819	0.357869	4.85707	1.19e-06	7	2.43962	1.03677	1.41667e-05	TRUE	2.03817
ETH	ethA_1432_indel	ethA	1432	1.73778	0.896881	1.93758	0.0526746	4	3.49567	-0.0201095	0.14392	TRUE	2.03817
ETH	ethA_1432_indel	ethA	1432	1.73778	0.896881	1.93758	0.0526746	4	3.49567	-0.0201095	0.14392	TRUE	2.03817
ETH	ethA_G450S	ethA	450	1.73119	0.558832	3.09787	0.0019492	3	2.8265	0.635877	0.00919434	FALSE	2.03817
ETH	ethA_113_indel	ethA	113	1.73034	0.195554	8.84836	0	28	2.11362	1.34705	0	TRUE	2.03817
ETH	Rv3083_D432N	Rv3083	432	1.71267	0.662999	2.58322	0.0097883	2	3.01215	0.413195	0.0359864	FALSE	2.03817
ETH	ethA_A89E	ethA	89	1.69518	0.393556	4.30736	1.65e-05	9	2.46655	0.923816	0.000147321	FALSE	2.03817
ETH	ethA_L190P	ethA	190	1.68674	0.783627	2.15248	0.0313592	3	3.22265	0.150836	0.0944554	TRUE	2.03817
ETH	ethA_W240!	ethA	240	1.68179	0.642007	2.61958	0.0088037	2	2.94012	0.423457	0.0336019	FALSE	2.03817
ETH	ethA_L35V	ethA	35	1.67534	0.594561	2.81778	0.0048358	3	2.84068	0.509999	0.0196577	FALSE	2.03817
ETH	ethA_G351V	ethA	351	1.66671	0.876561	1.90142	0.0572471	1	3.38477	-0.0513488	0.15389	FALSE	2.03817
ETH	ethA_C137Y	ethA	137	1.66416	0.504308	3.29988	0.0009673	3	2.6526	0.675711	0.00503802	TRUE	2.03817
ETH	ethA_M1T	ethA	1	1.65665	0.25929	6.38919	1.67e-10	17	2.16486	1.14845	3.21154e-09	TRUE	2.03817
ETH	ethA_D56A	ethA	56	1.65374	0.632117	2.61619	0.0088916	2	2.89269	0.41479	0.0336803	TRUE	2.03817
ETH	ethA_1048_indel	ethA	1048	1.65287	0.396585	4.16775	3.08e-05	6	2.43017	0.87556	0.000252459	TRUE	2.03817
ETH	ethA_1048_indel	ethA	1048	1.65287	0.396585	4.16775	3.08e-05	6	2.43017	0.87556	0.000252459	TRUE	2.03817
ETH	ethA_G43A	ethA	43	1.65112	0.879732	1.87684	0.0605398	1	3.37539	-0.0731565	0.16101	FALSE	2.03817
ETH	ethA_T392R	ethA	392	1.64842	0.658846	2.50198	0.0123499	2	2.93976	0.357084	0.0425859	TRUE	2.03817
ETH	ethA_887_indel	ethA	887	1.62764	0.408993	3.97964	6.9e-05	5	2.42927	0.826018	0.000479167	TRUE	2.03817
ETH	ethA_M260I	ethA	260	1.62057	0.597716	2.71127	0.0067027	3	2.79209	0.449045	0.0263886	FALSE	2.03817
ETH	ethA_598_indel:Rv3083_M371I	ethA	598	1.61382	0.380641	4.23974	2.24e-05	9	2.35987	0.86776	0.000193103	FALSE	2.03817
ETH	ethA_S375Y	ethA	375	1.60162	1.60944	0.995143	0.319667	1	4.75612	-1.55288	0.53456	FALSE	2.03817
ETH	ethA_C253!	ethA	253	1.59845	0.551885	2.89634	0.0037754	4	2.68014	0.516752	0.0161342	TRUE	2.03817
ETH	ethA_740_indel	ethA	740	1.59331	0.899968	1.77041	0.0766586	2	3.35725	-0.170623	0.189749	FALSE	2.03817
ETH	ethA_673_indel	ethA	673	1.5838	0.477005	3.3203	0.0008992	4	2.51873	0.648873	0.00473263	TRUE	2.03817
ETH	ethA_P51H:Rv0565c_Y97D	ethA	51	1.54723	0.407702	3.79501	0.0001476	5	2.34633	0.748137	0.000984	FALSE	2.03817
ETH	ethA_969_indel	ethA	969	1.54393	0.434271	3.55521	0.0003777	5	2.3951	0.692755	0.00219593	TRUE	2.03817
ETH	ethA_A19V	ethA	19	1.54321	0.76335	2.02163	0.0432148	2	3.03938	0.0470432	0.121786	TRUE	2.03817
ETH	mshA_A337T	mshA	337	1.53817	0.923859	1.66494	0.095924	1	3.34894	-0.27259	0.224274	FALSE	2.03817
ETH	ethA_T61M	ethA	61	1.52172	0.369885	4.11404	3.89e-05	6	2.2467	0.796748	0.000294697	TRUE	2.03817
ETH	inhA_I194T	inhA	194	1.52079	0.214287	7.09697	1.28e-12	51	1.94079	1.10078	3.55556e-11	TRUE	2.03817
ETH	ethA_1466_indel	ethA	1466	1.51701	0.799752	1.89685	0.057848	2	3.08452	-0.0505057	0.154674	FALSE	2.03817
ETH	fabG1_P12R	fabG1	12	1.51322	0.480417	3.14981	0.0016337	5	2.45484	0.571607	0.00800833	FALSE	2.03817
ETH	ethA_756_indel	ethA	756	1.50916	0.257249	5.86651	4.45e-09	12	2.01337	1.00495	7.41667e-08	TRUE	2.03817
ETH	ethA_743_indel	ethA	743	1.5	1.05543	1.42122	0.155251	1	3.56864	-0.568639	0.315552	FALSE	2.03817
ETH	Rv0565c_V343F	Rv0565c	343	1.47932	0.654982	2.25856	0.0239105	2	2.76309	0.195554	0.0756661	FALSE	2.03817
ETH	mshA_L137P	mshA	137	1.47356	0.448193	3.28778	0.0010098	4	2.35202	0.595101	0.00520515	FALSE	2.03817
ETH	ethA_827_indel	ethA	827	1.47	0.360777	4.07453	4.61e-05	7	2.17712	0.762875	0.00034403	TRUE	2.03817
ETH	ethA_482_indel	ethA	482	1.46774	0.261482	5.61316	1.99e-08	18	1.98024	0.955233	2.84286e-07	TRUE	2.03817
ETH	ethA_482_indel	ethA	482	1.46774	0.261482	5.61316	1.99e-08	18	1.98024	0.955233	2.84286e-07	TRUE	2.03817
ETH	ethA_771_indel	ethA	771	1.4603	0.38225	3.82028	0.0001333	13	2.20951	0.711092	0.000900676	TRUE	2.03817
ETH	ethA_771_indel	ethA	771	1.4603	0.38225	3.82028	0.0001333	13	2.20951	0.711092	0.000900676	TRUE	2.03817
ETH	fabG1_T4I	fabG1	4	1.44238	0.552171	2.6122	0.0089962	3	2.52464	0.360125	0.0338203	FALSE	2.03817
ETH	Rv0565c_g-27a	Rv0565c	-27	1.39949	0.680262	2.05728	0.0396592	2	2.7328	0.0661765	0.113312	FALSE	2.03817
ETH	ethA_L374H	ethA	374	1.39821	0.632579	2.21034	0.0270815	2	2.63807	0.158361	0.0830721	FALSE	2.03817
ETH	ethA_V17A	ethA	17	1.38067	0.462076	2.98797	0.0028083	8	2.28634	0.475002	0.0123171	TRUE	2.03817
ETH	ethA_707_indel	ethA	707	1.36513	0.50516	2.70238	0.0068846	3	2.35525	0.375019	0.026893	TRUE	2.03817
ETH	ethA_V10G	ethA	10	1.35949	1.05637	1.28695	0.198113	2	3.42998	-0.710994	0.380986	TRUE	2.03817
ETH	ethA_L374F	ethA	374	1.33514	0.865077	1.54337	0.12274	1	3.03069	-0.360414	0.267991	FALSE	2.03817
ETH	ethA_P257S	ethA	257	1.33513	0.635366	2.10136	0.0356092	2	2.58045	0.0898167	0.103515	TRUE	2.03817
ETH	ethA_L397P:Rv0565c_I196I	ethA	397	1.33017	0.542165	2.45343	0.01415	4	2.39281	0.267522	0.0484589	FALSE	2.03817
ETH	ethR_F184L	ethR	184	1.32705	0.652881	2.03261	0.0420919	2	2.6067	0.047406	0.119579	FALSE	2.03817
ETH	ethA_Q165!	ethA	165	1.32614	0.923791	1.43554	0.151134	1	3.13677	-0.484494	0.310976	TRUE	2.03817
ETH	ethA_A185V	ethA	185	1.32614	0.923791	1.43554	0.151134	1	3.13677	-0.484494	0.310976	TRUE	2.03817
ETH	ethA_C403W	ethA	403	1.32531	0.746334	1.77576	0.0757727	5	2.78812	-0.137505	0.188489	FALSE	2.03817
ETH	ethA_M204T	ethA	204	1.32384	0.513075	2.5802	0.0098743	3	2.32947	0.31821	0.0360376	TRUE	2.03817
ETH	ethA_W69!	ethA	69	1.32169	1.30599	1.01202	0.311529	1	3.88144	-1.23806	0.526405	TRUE	2.03817
ETH	ethA_A247P	ethA	247	1.2946	0.658902	1.96478	0.04944	2	2.58604	0.00314828	0.135824	TRUE	2.03817
ETH	inhA_A239V	inhA	239	1.2852	0.528387	2.43231	0.015003	5	2.32084	0.249561	0.0503456	TRUE	2.03817
ETH	ethA_G139D	ethA	139	1.27678	0.797931	1.60011	0.109575	2	2.84072	-0.287169	0.25017	FALSE	2.03817
ETH	ethA_W256!	ethA	256	1.27563	0.50764	2.51287	0.0119754	3	2.2706	0.280657	0.041872	TRUE	2.03817
ETH	ethA_Q165P	ethA	165	1.25642	0.371296	3.38388	0.0007147	7	1.98416	0.52868	0.00388424	TRUE	2.03817
ETH	inhA_I21V	inhA	21	1.23849	0.297672	4.16059	3.17e-05	12	1.82193	0.655054	0.000255645	TRUE	2.03817
ETH	inhA_I95V	inhA	95	1.23453	1.13378	1.08886	0.276215	2	3.45673	-0.987677	0.486293	FALSE	2.03817
ETH	ethA_1306_indel	ethA	1306	1.22552	0.26185	4.68025	2.87e-06	12	1.73875	0.712297	3.11957e-05	TRUE	2.03817
ETH	ethA_1306_indel	ethA	1306	1.22552	0.26185	4.68025	2.87e-06	12	1.73875	0.712297	3.11957e-05	TRUE	2.03817
ETH	ethA_1306_indel	ethA	1306	1.22552	0.26185	4.68025	2.87e-06	12	1.73875	0.712297	3.11957e-05	TRUE	2.03817
ETH	ethA_1306_indel	ethA	1306	1.22552	0.26185	4.68025	2.87e-06	12	1.73875	0.712297	3.11957e-05	TRUE	2.03817
ETH	ethA_Y250!	ethA	250	1.22226	0.461879	2.64628	0.0081383	6	2.12754	0.316978	0.0313012	FALSE	2.03817
ETH	inhA_I21T	inhA	21	1.21806	0.199105	6.1177	9.49e-10	53	1.60831	0.82782	1.69464e-08	TRUE	2.03817
ETH	ethA_S57Y	ethA	57	1.2114	0.388844	3.11538	0.0018371	5	1.97353	0.449263	0.0087481	FALSE	2.03817
ETH	ethA_Y140!	ethA	140	1.20573	0.318677	3.78355	0.0001546	8	1.83034	0.581122	0.00101711	TRUE	2.03817
ETH	ethA_P192S	ethA	192	1.18184	0.363459	3.25164	0.0011474	23	1.89422	0.469459	0.00579495	TRUE	2.03817
ETH	ethA_1397_indel	ethA	1397	1.17576	0.693977	1.69424	0.0902198	2	2.53596	-0.184432	0.214809	FALSE	2.03817
ETH	Rv3083_848_indel	Rv3083	848	1.17186	0.65718	1.78317	0.0745586	2	2.45994	-0.116209	0.186809	TRUE	2.03817
ETH	ethR_A174T	ethR	174	1.15852	0.703378	1.64708	0.0995413	2	2.53714	-0.2201	0.231491	FALSE	2.03817
ETH	ethA_F302V	ethA	302	1.15814	0.87749	1.31984	0.18689	1	2.87802	-0.561738	0.36254	TRUE	2.03817
ETH	ethA_153_indel	ethA	153	1.15083	0.456149	2.52293	0.0116381	4	2.04488	0.256782	0.0412699	TRUE	2.03817
ETH	ethA_H281R	ethA	281	1.14825	0.398398	2.88216	0.0039495	5	1.92911	0.367388	0.0167352	TRUE	2.03817
ETH	ethA_L374R	ethA	374	1.14818	0.636046	1.80518	0.0710467	2	2.39483	-0.0984736	0.181553	TRUE	2.03817
ETH	ethA_a-11g	ethA	-11	1.11571	0.357295	3.12267	0.0017922	30	1.81601	0.415416	0.00861635	TRUE	2.03817
ETH	ethA_G11V	ethA	11	1.10894	0.549165	2.01932	0.0434538	3	2.1853	0.032577	0.121786	TRUE	2.03817
ETH	ethA_854_indel	ethA	854	1.1081	0.620773	1.78503	0.0742564	2	2.32481	-0.108616	0.186809	TRUE	2.03817
ETH	ethA_269_indel	ethA	269	1.0953	0.399406	2.74231	0.0061009	5	1.87813	0.312459	0.0242099	TRUE	2.03817
ETH	ethA_269_indel	ethA	269	1.0953	0.399406	2.74231	0.0061009	5	1.87813	0.312459	0.0242099	TRUE	2.03817
ETH	ethA_L397R	ethA	397	1.07194	0.679786	1.57687	0.114825	2	2.40432	-0.260446	0.257455	FALSE	2.03817
ETH	ethA_R207C	ethA	207	1.06895	0.895886	1.19318	0.2328	1	2.82489	-0.686986	0.430357	TRUE	2.03817
ETH	Rv0565c_1206_indel	Rv0565c	1206	1.05957	0.114337	9.26712	0	127	1.28367	0.835473	0	FALSE	2.03817
ETH	ethA_R469W	ethA	469	1.04669	0.507453	2.06263	0.0391476	3	2.0413	0.0520805	0.112493	TRUE	2.03817
ETH	Rv3083_1151_indel	Rv3083	1151	1.04304	0.775971	1.34417	0.178893	2	2.56394	-0.477866	0.352152	FALSE	2.03817
[truncated: 2,940 more rows]

## Sheet: Table S4
Table S4: Promoter mutations are associated with significantly different effects on MIC for INH, EMB, and KAN. Beta and p-values are shown for the effect of a promoter mutation on log2(MIC) when controlling for gene. Fisher exact odds ratios (Promoter 0/1 vs significant MIC elevating status)
	Linear model (COEF ~ GENE + PROM)		Count-weighted model		Fisher Exact
DRUG	Beta	P	B	P	OR	P
RIF	-0.4598	0.583332	-1.9258	0.0921	0	1
RFB	-0.25727	0.66954	-1.1432	0.215	0	1
INH	1.6846	0.000172	1.676	7.61e-06	7.32	4.42e-07
ETH	-0.1551	0.6687	0.9544	2.74e-06	2.13	0.156
EMB	0.492	0.00975	1.12634	7.16e-09	9.95	5.13e-07
KAN	0.35782	0.0229	0.78866	0.00155	6.16	0.000281
AMI	0.18637	0.245	0.203134	0.563	2.37	0.132
BDQ	-0.1081	0.8958	-0.9438	0.090112	0	1
CFZ	-0.141	0.7613	-0.30179	0.153987	0	1
LEV	0.25472	0.6106	-1.6865	0.00424	1.94	0.453
LZD	-0.12538	0.808	-0.3856	0.4295	0	1
MXF	-0.3715	0.4831	-1.9368	0.00286	0	1
DLM	-0.768	0.088	-0.2643	0.312	0.47	0.703

## Sheet: Table S5
Table S5: Homoplasy predicts MIC-elevating behavior of mutations for most drugs. Fisher exact odds ratios and P-values.
DRUG	OR	P
EMB	6.73	9.58e-10
LEV	5.89	0.000102
RFB	4.94	5.79e-05
MXF	4.87	0.000212
BDQ	4.66	0.00028
ETH	3.93	3.06e-11
INH	3.84	1.83e-07
CFZ	2.81	0.094
RIF	2.79	0.0032
LZD	1.52	0.71
KAN	1.2	0.82
AMI	1.15	0.81
DLM	0.35	0.105

## Sheet: Table S6
Table S6: Propotion of mutations associated with sub-ECOFF MIC elevations by drug
Drug	Total resistant mutations identified	Mutations that elevate MIC below ECOFF	MIC-elevating mutations with confidence intervals all or partially below ECOFF	Proportion MIC-elevating mutations below ECOFF	Proportion MIC-elevating mutations with confidence interval all or partially below ECOFF
AMI	13	6	10	0.46	0.77
BDQ	19	15	18	0.79	0.95
CFZ	9	5	8	0.56	0.89
DLM	20	8	11	0.4	0.55
EMB	50	32	44	0.64	0.88
ETH	128	70	117	0.55	0.91
INH	61	10	34	0.16	0.56
KAN	18	6	12	0.33	0.67
LEV	22	3	11	0.14	0.5
LZD	8	3	6	0.38	0.75
MXF	19	4	9	0.21	0.47
RFB	36	8	21	0.22	0.58
RIF	46	11	20	0.24	0.43

## Sheet: Table S7
Supplementary Table 7: Effects of additional mutations for embA and gyrB mutants in EMB, LEV, and MXF. Counts, mean, and median MIC for each subgroup are shown. Additional mutations present in embB (EMB) or gyrA (LEV,MXF) appear in the additional mutations column.
Mutant	Additional Mutations	LOG2MIC			UPLOG2MIC
	# embB mutations	COUNTS	MEAN	MEDIAN	COUNTS	MEAN	MEDIAN
EMB
embA_-35_indel	0	4	-0.75	-1	4	0.25	0
embA_-35_indel	1	7	2.71429	3	7	6.57143	8
embA_-35_indel	2	1	2	2	1	3	3
embA_-35_indel	3	1	2	2	1	3	3
embA_-35_indel	6	1	2	2	1	3	3
embA_-35_indel	7	2	3	3	2	6	6
embA_-44_indel	1	15	2.93333	3	15	7.66667	8
embA_Q952Q	0	10	-0.5	0	10	0.5	1
embA_Q952Q	1	6	2.5	2.5	6	4.16667	3.5
embA_c-11a	0	8	0.875	1	8	1.875	2
embA_c-11a	1	54	2.57296	3	54	6.83333	8
embA_c-11a	2	6	3	3	6	4	4
embA_c-12t	0	14	0.357143	0	14	1.64286	1
embA_c-12t	1	59	2.08475	2	59	3.49153	3
embA_c-12t	2	1	1	1	1	2	2
embA_c-12t	3	2	2.5	2.5	2	5.5	5.5
embA_c-15g	0	1	1	1	1	2	2
embA_c-15g	1	1	3	3	1	8	8
embA_c-15g	6	1	1	1	1	2	2
embA_c-16a	0	9	0.555556	1	9	1.55556	2
embA_c-16a	1	7	2.14286	2	7	3.71429	3
embA_c-16a	3	1	3	3	1	8	8
embA_c-16g	0	32	0.498125	1	32	1.625	2
embA_c-16g	1	14	2.64286	3	14	5.64286	6
embA_c-16g	2	4	4.25	4.5	4	7.25	8
embA_c-16g	3	2	3	3	2	8	8
embA_c-16g	6	1	2	2	1	3	3
embA_c-16t	0	23	0.434783	0	23	1.78261	1
embA_c-16t	1	64	2.45219	3	64	5.82719	8
embA_c-16t	3	1	3	3	1	8	8
embA_c-16t	7	1	3	3	1	8	8
embA_c-8t	1	10	2.2	2	10	4.4	3
embA_g-43c	0	5	0.8	1	5	1.8	2
embA_g-43c	1	24	2.54167	3	24	5.125	5
embA_g-43c	2	7	3	3	7	8	8
LEV
gyrB_T378S	None	2	-2.53	-2.53	2	-1.5	-1.5
gyrB_R446H	None	3	-0.686667	0	3	0.333333	1
gyrB_D461N	None	7	0.428571	0	7	1.42857	1
gyrB_D461N	gyrA_A90V	4	3	3	4	6	6
gyrB_D461N	gyrA_P472S	1	0	0	1	1	1
gyrB_N499D	None	1	1	1	1	2	2
gyrB_N499T	None	3	-0.666667	-1	3	0.333333	0
gyrB_N499T	gyrA_D94A	1	3	3	1	6	6
gyrB_N499T	gyrA_D94G	2	3	3	2	6	6
gyrB_N499T	gyrA_E289D	2	-1.53	-1.53	2	-0.5	-0.5
gyrB_E501D	None	13	-0.706154	-1	13	0.461538	0
gyrB_E501D	gyrA_D94A	2	2	2	2	4	4
gyrB_E501D	gyrA_D94AgyrA_T267I	1	3	3	1	6	6
gyrB_E501D	gyrA_D94GgyrA_R450S	1	3	3	1	6	6
gyrB_E501D	gyrA_D94N	1	3	3	1	6	6
MXF
gyrB_R446C	None	9	-1.57556	-1	9	-0.346667	0
gyrB_D461N	None	9	-1	-1	9	0	0
gyrB_D461N	gyrA_A90V	4	2	2	4	5	5
gyrB_D461N	gyrA_T267I	1	-1	-1	1	0	0
gyrB_N499T	None	3	-1.68667	-1	3	-0.666667	0
gyrB_N499T	gyrA_D94A	2	1.5	1.5	2	3.5	3.5
gyrB_N499T	gyrA_D94G	2	2	2	2	5	5
gyrB_N499T	gyrA_E289D__gyrB_G31G	1	-4.06	-4.06	1	-3.06	-3.06
gyrB_T500A	gyrA_A90V	1	2	2	1	5	5
gyrB_T500N	None	1	2	2	1	5	5
gyrB_T500N	gyrA_D94G	1	2	2	1	5	5
gyrB_T500N	gyrA_c-34t	1	-2	-2	1	-1	-1
gyrB_E501D	None	13	0.683077	2	13	2.76	5
gyrB_E501D	gyrA_D94A	2	2	2	2	5	5
gyrB_E501D	gyrA_D94AgyrA_T267I	1	2	2	1	5	5
gyrB_E501D	gyrA_D94GgyrA_R450S	1	2	2	1	5	5
gyrB_E501D	gyrA_D94N	1	2	2	1	5	5
gyrB_A641A	gyrA_G239GgyrA_T377I	1	-3.06	-3.06	1	-2	-2

## Sheet: Table S8
Supplementary Table 8: Matched mutation-phenotype associations with 2021 WHO tuberculosis catalogue.
DRUG	GENE	POSITION	MIC_MUTATION_NAME	WHO_MUTATION_NAME	COEF	BH_PVAL	ECOFF	HOMOPLASY	S Isolates with mutation (n)	R Isolates with mutation (n)	Positive Predictive Value (PPV) of mutation for phenotypic resistance	PPV 95%CI	Initial confidence grading	Supporting dataset	Additional grading criteria	Final confidence grading
RIF	rpoB	450	rpoB_S450F	rpoB_S450F	9.00704	0	3.27289	TRUE	0	112	1	(96.5 - 100)	Assoc w R	ALL+WHO		1) Assoc w R
RIF	rpoB	450	rpoB_S450M	rpoB_S450M	8.87263	0	3.27289	FALSE	0	5	1	(47.8 - 100)	Uncert. Sig.	ALL+WHO	RRDR	2) Assoc w RI
RIF	rpoB	432	rpoB_Q432K	rpoB_Q432K	8.72496	0	3.27289	TRUE	1	34	0.971	(74 - 99.9)	Assoc w R	ALL+WHO		1) Assoc w R
RIF	rpoB	432	rpoB_Q432P	rpoB_Q432P	8.62956	0	3.27289	TRUE	1	29	0.967	(76.2 - 99.9)	Assoc w R	ALL+WHO		1) Assoc w R
RIF	rpoB	445	rpoB_H445D	rpoB_H445D	8.47165	0	3.27289	TRUE	3	288	0.99	(96.9 - 99.8)	Assoc w R	ALL+WHO		1) Assoc w R
RIF	rpoB	445	rpoB_H445Y	rpoB_H445Y	8.43161	0	3.27289	TRUE	4	347	0.989	(96.7 - 99.6)	Assoc w R	ALL+WHO		1) Assoc w R
RIF	rpoB	445	rpoB_H445P	rpoB_H445P	8.41261	2.79415e-07	3.27289	TRUE	0	5	1	(15.8 - 100)	Uncert. Sig.	ALL+WHO	RRDR	2) Assoc w RI
RIF	rpoB	450	rpoB_S450L	rpoB_S450L	8.40262	0	3.27289	TRUE	74	6536	0.989	(98.3 - 98.9)	Assoc w R	ALL+WHO		1) Assoc w R
RIF	rpoB	450	rpoB_S450W	rpoB_S450W	8.38771	0	3.27289	TRUE	5	151	0.968	(91.4 - 98.8)	Assoc w R	ALL+WHO		1) Assoc w R
RIF	rpoB	441	rpoB_S441Q	rpoB_S441Q	8.38213	0.000535537	3.27289	FALSE	0	11	1	(71.5 - 100)	Assoc w R	ALL+WHO		1) Assoc w R
RIF	rpoB	170	rpoB_V170F	rpoB_V170F	8.37447	0	3.27289	TRUE	0	71	1	(90 - 100)	Assoc w R	ALL+WHO		1) Assoc w R
RIF	rpoB	435	rpoB_D435V	rpoB_D435V	8.32476	0	3.27289	TRUE	9	732	0.988	(97.6 - 99.4)	Assoc w R	ALL+WHO		1) Assoc w R
INH	katG	328	katG_W328L	katG_W328L	8.15996	0.0861173	2.12067	FALSE	0	15	1	(78.2 - 100)	Assoc w R	ALL+WHO		1) Assoc w R
RIF	rpoB	445	rpoB_H445R	rpoB_H445R	8.1311	0	3.27289	TRUE	2	79	0.975	(89.5 - 99.6)	Assoc w R	ALL+WHO		1) Assoc w R
RIF	rpoB	445	rpoB_H445C	rpoB_H445C	8.00062	0	3.27289	TRUE	3	36	0.923	(76.9 - 98.2)	Assoc w R	ALL+WHO		1) Assoc w R
DLM	ddn	49	ddn_L49P	ddn_L49P	7.39201	0	4.11759	FALSE	1	5	0.833	(35.9 - 99.6)	Assoc w R	ALL	ALL only	2) Assoc w RI
RIF	rpoB	432	rpoB_Q432L	rpoB_Q432L	7.32519	0	3.27289	TRUE	1	21	0.955	(71.3 - 99.9)	Assoc w R	ALL+WHO		1) Assoc w R
RIF	rpoB	441	rpoB_S441L	rpoB_S441L	7.13711	0	3.27289	TRUE	0	26	1	(79.4 - 100)	Assoc w R	ALL+WHO		1) Assoc w R
AMI	rrs	1401	rrs_a1401g	rrs_a1401g	6.78266	0	2.28427	TRUE	50	939	0.949	(93.2 - 96.1)	Assoc w R	ALL+WHO		1) Assoc w R
RIF	rpoB	446	rpoB_K446Q	rpoB_K446Q	6.73344	3.74797e-05	3.27289	FALSE	0	7	1		Uncert. Sig.	ALL+WHO	RRDR	2) Assoc w RI
INH	katG	315	katG_S315T	katG_S315T	6.16143	0	2.12067	TRUE	101	9483	0.989	(98.3 - 98.9)	Assoc w R	ALL+WHO		1) Assoc w R
RIF	rpoB	435	rpoB_D435F	rpoB_D435F	6.11566	0	3.27289	TRUE	3	39	0.929	(78.6 - 98.3)	Assoc w R	ALL+WHO		1) Assoc w R
LEV	gyrA	88	gyrA_G88C	gyrA_G88C	5.56682	0	1.5799	TRUE	0	28	1	(87.2 - 100)	Assoc w R	ALL+WHO		1) Assoc w R
RIF	rpoB	445	rpoB_H445L	rpoB_H445L	5.50017	0	3.27289	TRUE	8	115	0.935	(86.5 - 96.9)	Assoc w R	ALL+WHO		1) Assoc w R
MXF	gyrA	88	gyrA_G88C	gyrA_G88C	5.46476	0	2.33353	TRUE	2	29	0.935	(77.9 - 99.2)	Assoc w R	ALL+WHO		1) Assoc w R
INH	katG	315	katG_S315N	katG_S315N	5.19288	0	2.12067	TRUE	2	117	0.983	(91.9 - 99.7)	Assoc w R	ALL+WHO		1) Assoc w R
RIF	rpoB	435	rpoB_D435G	rpoB_D435G	5.17736	0	3.27289	TRUE	9	76	0.894	(12.8 - 64.9)	Uncert. Sig.	ALL+WHO	Prev. WHO	2) Assoc w RI
RIF	rpoB	435	rpoB_D435Y	rpoB_D435Y	4.60231	0	3.27289	TRUE	44	162	0.786	(49 - 68.3)	Assoc w R	ALL+WHO		1) Assoc w R
MXF	gyrA	94	gyrA_D94N	gyrA_D94N	4.47777	0	2.33353	TRUE	41	162	0.798	(71.6 - 83.9)	Assoc w R	ALL+WHO		1) Assoc w R
MXF	gyrA	94	gyrA_D94Y	gyrA_D94Y	4.44447	0	2.33353	TRUE	34	77	0.694	(58.5 - 76.9)	Assoc w R	ALL+WHO		1) Assoc w R
RIF	rpoB	437	rpoB_N437H	rpoB_N437H	4.31022	0.027024	3.27289	TRUE	0	3	1		Uncert. Sig.	ALL+WHO	RRDR	2) Assoc w RI
RIF	rpoB	432	rpoB_Q432H	rpoB_Q432H	4.23171	0.000589186	3.27289	TRUE	0	3	1		Uncert. Sig.	ALL+WHO	RRDR	2) Assoc w RI
MXF	gyrA	94	gyrA_D94G	gyrA_D94G	4.20625	0	2.33353	TRUE	327	815	0.714	(67.3 - 72.8)	Assoc w R	ALL+WHO		1) Assoc w R
RIF	rpoB	445	rpoB_H445G	rpoB_H445G	4.1562	5.14743e-07	3.27289	TRUE	3	7	0.7	(18.4 - 90.1)	Uncert. Sig.	ALL+WHO	Prev. WHO	2) Assoc w RI
LEV	gyrA	94	gyrA_D94N	gyrA_D94N	4.11313	0	1.5799	TRUE	11	216	0.952	(91 - 97.4)	Assoc w R	ALL+WHO		1) Assoc w R
LEV	gyrA	94	gyrA_D94Y	gyrA_D94Y	4.00485	0	1.5799	TRUE	10	106	0.914	(84.2 - 95.6)	Assoc w R	ALL+WHO		1) Assoc w R
MXF	gyrA	94	gyrA_D94H	gyrA_D94H	3.98921	0	2.33353	TRUE	15	26	0.634	(45.8 - 77.3)	Assoc w R	ALL+WHO		1) Assoc w R
LEV	gyrA	94	gyrA_D94G	gyrA_D94G	3.91545	0	1.5799	TRUE	51	1190	0.959	(94.4 - 96.8)	Assoc w R	ALL+WHO		1) Assoc w R
LEV	gyrA	94	gyrA_D94H	gyrA_D94H	3.81992	0	1.5799	TRUE	3	48	0.941	(83.5 - 98.7)	Assoc w R	ALL+WHO		1) Assoc w R
RIF	rpoB	444	rpoB_T444I	rpoB_T444I	3.70406	0.403429	3.27289	FALSE	0	2	1		Uncert. Sig.	ALL+WHO	RRDR	2) Assoc w RI
AMI	rrs	1484	rrs_g1484t	rrs_g1484t	3.55673	0	2.28427	TRUE	2	6	0.75	(29 - 96.3)	Assoc w R	ALL	ALL only	2) Assoc w RI
LZD	rplC	154	rplC_C154R	rplC_C154R	3.43191	0	1.5846	TRUE	17	47	0.734	(57.9 - 82.2)	Assoc w R	ALL+WHO		1) Assoc w R
RIF	rpoB	430	rpoB_L430R	rpoB_L430R	3.3704	0.0014075	3.27289	TRUE	1	21	0.955	(0 - 97.5)	Uncert. Sig.	ALL+WHO	RRDR	2) Assoc w RI
MXF	gyrB	501	gyrB_E501D	gyrB_E501D	3.34622	0	2.33353	TRUE	8	33	0.805	(54.1 - 87.7)	Assoc w R	ALL+WHO		1) Assoc w R
RIF	rpoB	491	rpoB_I491F	rpoB_I491F	3.29391	1.64396e-08	3.27289	TRUE	57	54	0.486	(34.3 - 54.3)	Assoc w R	ALL+WHO		1) Assoc w R
RIF	rpoB	448	rpoB_R448Q	rpoB_R448Q	3.25251	0.0769945	3.27289	TRUE	0	6	1	(15.8 - 100)	Uncert. Sig.	ALL+WHO	RRDR	2) Assoc w RI
RIF	rpoB	452	rpoB_L452P	rpoB_L452P	3.2447	0	3.27289	TRUE	53	121	0.695	(50.6 - 68)	Assoc w R	ALL+WHO		1) Assoc w R
AMI	rrs	1402	rrs_c1402t	rrs_c1402t	3.24307	1.19007e-05	2.28427	TRUE	10	5	0.333	(8.4 - 58.1)	Uncert. Sig.	ALL+WHO	WHO-end. gDST	2) Assoc w RI
ETH	ethA	367	ethA_367_indel	ethA_367_ins_1_ggctttggatgtgaac_ggcttttggatgtgaac	3.15949	1.78428e-10	2.02646	TRUE	0	9	1	(63.1 - 100)	Assoc w R	ALL	ALL only	2) Assoc w RI
MXF	gyrA	91	gyrA_S91P	gyrA_S91P	3.14548	0	2.33353	TRUE	56	90	0.616	(50.1 - 67.2)	Assoc w R	ALL+WHO		1) Assoc w R
LEV	gyrB	499	gyrB_N499D	gyrB_N499D	3.02455	0.00535239	1.5799	FALSE	0	6	1	(39.8 - 100)	Uncert. Sig.	ALL+WHO	WHO-end. gDST	2) Assoc w RI
EMB	embB	328	embB_D328Y	embB_D328Y	3.01266	0	1.96733	TRUE	3	24	0.889	(54.4 - 96)	Assoc w R	ALL+WHO		1) Assoc w R
RIF	rpoB	445	rpoB_H445S	rpoB_H445S	2.94948	0.000133142	3.27289	TRUE	2	12	0.857	(44.4 - 97.5)	Assoc w R	WHO		1) Assoc w R
INH	fabG1	-15	fabG1_c-15t	inhA_c-777t fabG1_c-15t	2.93435	0	2.12067	TRUE	172	2290	0.93	(78.8 - 83.9)	Assoc w R	ALL+WHO		1) Assoc w R
LEV	gyrA	90	gyrA_A90V	gyrA_A90V	2.89239	0	1.5799	TRUE	72	679	0.904	(86.5 - 91.4)	Assoc w R	ALL+WHO		1) Assoc w R
ETH	fabG1	-15	fabG1_c-15t	inhA_c-777t fabG1_c-15t	2.86382	0	2.02646	TRUE	409	1297	0.76	(61.5 - 67.1)	Assoc w R	ALL+WHO		1) Assoc w R
MXF	gyrA	94	gyrA_D94A	gyrA_D94A	2.80628	0	2.33353	TRUE	105	125	0.543	(38.7 - 53.2)	Assoc w R	ALL+WHO		1) Assoc w R
ETH	fabG1	203	fabG1_L203L	inhA_g-154a fabG1_L203L	2.80016	0	2.02646	TRUE	47	175	0.788	(46.6 - 66)	Assoc w R	ALL	ALL only	2) Assoc w RI
LEV	gyrA	91	gyrA_S91P	gyrA_S91P	2.73347	0	1.5799	TRUE	20	127	0.864	(77.6 - 90.5)	Assoc w R	ALL+WHO		1) Assoc w R
MXF	gyrA	90	gyrA_A90V	gyrA_A90V	2.73056	0	2.33353	TRUE	353	323	0.478	(37.8 - 45.8)	Assoc w R	ALL+WHO		1) Assoc w R
LEV	gyrA	94	gyrA_D94A	gyrA_D94A	2.6864	0	1.5799	TRUE	29	228	0.887	(80.8 - 90.6)	Assoc w R	ALL+WHO		1) Assoc w R
LEV	gyrB	461	gyrB_D461N	gyrB_D461N	2.67889	0	1.5799	TRUE	17	24	0.585	(27.3 - 64)	Assoc w R	ALL	ALL only	2) Assoc w RI
ETH	ethA	147	ethA_Y147!	ethA_Y147!	2.67464	3.6023e-06	2.02646	FALSE	6	12	0.667	(41 - 86.7)	Assoc w R	ALL	ALL only	2) Assoc w RI
ETH	inhA	94	inhA_S94A	inhA_S94A	2.6319	0	2.02646	TRUE	10	62	0.861	(34.5 - 76.8)	Assoc w R	ALL	ALL only	2) Assoc w RI
RIF	rpoB	445	rpoB_H445Q	rpoB_H445Q	2.62758	0.0147628	3.27289	TRUE	1	16	0.941	(0 - 97.5)	Uncert. Sig.	ALL+WHO	RRDR	2) Assoc w RI
EMB	embB	306	embB_M306V	embB_M306V	2.60576	0	1.96733	TRUE	367	1801	0.831	(79 - 82.5)	Assoc w R	ALL+WHO		1) Assoc w R
EMB	embB	319	embB_Y319S	embB_Y319S	2.59862	0	1.96733	TRUE	24	121	0.834	(76.2 - 89)	Assoc w R	ALL+WHO		1) Assoc w R
RIF	rpoB	445	rpoB_H445N	rpoB_H445N	2.5788	6.756e-12	3.27289	TRUE	39	46	0.541	(12.8 - 37.5)	Uncert. Sig.	ALL+WHO	Borderline	1) Assoc w R
RIF	rpoB	428	rpoB_S428G	rpoB_S428G	2.55863	0.807946	3.27289	FALSE	0	1	1		Uncert. Sig.	ALL+WHO	RRDR	2) Assoc w RI
EMB	embB	406	embB_G406C	embB_G406C	2.4375	0	1.96733	TRUE	20	24	0.545	(26.3 - 60.6)	Assoc w R	ALL+WHO		1) Assoc w R
ETH	ethA	341	ethA_A341V	ethA_A341V	2.35626	4.012e-13	2.02646	TRUE	2	18	0.9	(66.9 - 98.7)	Assoc w R	ALL	ALL only	2) Assoc w RI
EMB	embB	497	embB_Q497R	embB_Q497R	2.32598	0	1.96733	TRUE	111	497	0.817	(66.4 - 75.7)	Assoc w R	ALL+WHO		1) Assoc w R
INH	fabG1	203	fabG1_L203L	inhA_g-154a fabG1_L203L	2.26219	0	2.12067	TRUE	50	387	0.886	(58.8 - 74.3)	Assoc w R	ALL+WHO		1) Assoc w R
EMB	embB	306	embB_M306L	embB_M306L	2.21413	0	1.96733	TRUE	18	68	0.791	(61.4 - 83.5)	Assoc w R	ALL+WHO		1) Assoc w R
ETH	ethA	753	ethA_753_indel	ethA_753_ins_1_g_gc	2.20548	4.89883e-14	2.02646	TRUE	6	19	0.76	(38.3 - 85.8)	Assoc w R	ALL	ALL only	2) Assoc w RI
RIF	rpoB	429	rpoB_Q429H	rpoB_Q429H	2.20108	0.461845	3.27289	TRUE	1	6	0.857	(0 - 97.5)	Uncert. Sig.	ALL+WHO	RRDR	2) Assoc w RI
RIF	rpoB	430	rpoB_L430P	rpoB_L430P	2.18109	0	3.27289	TRUE	103	106	0.507	(16.3 - 31.2)	Uncert. Sig.	ALL+WHO	Borderline	1) Assoc w R
AMI	eis	-14	eis_c-14t	eis_c-14t	2.161	0	2.28427	TRUE	51	32	0.386	(25 - 47)	Assoc w R	WHO		1) Assoc w R
ETH	ethA	359	ethA_Q359!	ethA_Q359!	2.15556	0.0002618	2.02646	TRUE	2	8	0.8	(44.4 - 97.5)	Assoc w R	ALL	ALL only	2) Assoc w RI
RIF	rpoB	435	rpoB_D435A	rpoB_D435A	2.05436	0.966324	3.27289	FALSE	2	6	0.75	(0 - 84.2)	Uncert. Sig.	ALL+WHO	Prev. WHO	2) Assoc w RI
ETH	ethA	1243	ethA_1243_indel	ethA_1243_del_1_ca_c	2.0329	1.37623e-09	2.02646	TRUE	4	27	0.871	(66.3 - 95.8)	Assoc w R	ALL	ALL only	2) Assoc w RI
MXF	gyrB	461	gyrB_D461N	gyrB_D461N	2.01851	5.44853e-09	2.33353	TRUE	21	9	0.3	(2.7 - 32.4)	Uncert. Sig.	ALL+WHO	FQ X-R	2) Assoc w RI
RIF	rpoB	429	rpoB_Q429L	rpoB_Q429L	1.8858	0.0383403	3.27289	TRUE	0	9	1		Uncert. Sig.	ALL+WHO	RRDR	2) Assoc w RI
EMB	embB	306	embB_M306I	embB_M306I	1.86486	0	1.96733	TRUE	625	984	0.612	(50 - 55.4)	Assoc w R	ALL+WHO		1) Assoc w R
ETH	ethA	390	ethA_S390F	ethA_S390F	1.83754	8.3538e-10	2.02646	FALSE	4	19	0.826	(61.2 - 95)	Assoc w R	ALL	ALL only	2) Assoc w RI
ETH	ethA	32	ethA_Y32D	ethA_Y32D	1.83743	5.486e-05	2.02646	FALSE	6	10	0.625	(35.4 - 84.8)	Assoc w R	ALL	ALL only	2) Assoc w RI
EMB	embB	497	embB_Q497K	embB_Q497K	1.82448	0	1.96733	TRUE	25	68	0.731	(44.1 - 70.4)	Assoc w R	ALL+WHO		1) Assoc w R
ETH	ethA	1392	ethA_1392_indel	ethA_1392_ins_2_gt_gtct	1.81701	9.095e-05	2.02646	TRUE	1	6	0.857	(42.1 - 99.6)	Assoc w R	ALL	ALL only	2) Assoc w RI
INH	fabG1	-8	fabG1_t-8a	inhA_t-770a fabG1_t-8a	1.79966	2.30594e-06	2.12067	TRUE	5	86	0.945	(18.7 - 81.3)	Uncert. Sig.	ALL+WHO	WHO-end. gDST	2) Assoc w RI
ETH	ethA	1	ethA_M1R	ethA_M1R	1.77791	1.9317e-08	2.02646	FALSE	17	27	0.614	(45.5 - 75.6)	Assoc w R	ALL+WHO		1) Assoc w R
ETH	fabG1	-8	fabG1_t-8c	inhA_t-770c fabG1_t-8c	1.74911	0	2.02646	TRUE	36	66	0.647	(9.6 - 34.6)	Uncert. Sig.	ALL+WHO	WHO-end. gDST	2) Assoc w RI
LEV	gyrB	501	gyrB_E501D	gyrB_E501D	1.74439	2.6048e-12	1.5799	TRUE	24	28	0.538	(23.4 - 55.4)	Uncert. Sig.	ALL+WHO	FQ X-R	2) Assoc w RI
RIF	rpoB	446	rpoB_K446E	rpoB_K446E	1.71909	0.967923	3.27289	FALSE	0	1	1		Uncert. Sig.	ALL+WHO	RRDR	2) Assoc w RI
EMB	embB	354	embB_D354A	embB_D354A	1.68087	0	1.96733	TRUE	153	236	0.607	(49.8 - 60.6)	Assoc w R	ALL+WHO		1) Assoc w R
INH	fabG1	-8	fabG1_t-8c	inhA_t-770c fabG1_t-8c	1.68068	9.27764e-10	2.12067	TRUE	14	127	0.901	(14.6 - 57)	Uncert. Sig.	ALL+WHO	WHO-end. gDST	2) Assoc w RI
EMB	embB	406	embB_G406D	embB_G406D	1.66017	0	1.96733	TRUE	112	117	0.511	(33.7 - 48.1)	Assoc w R	ALL+WHO		1) Assoc w R
ETH	ethA	1	ethA_M1T	ethA_M1T	1.63029	1.1866e-08	2.02646	TRUE	6	24	0.8	(59 - 91.7)	Assoc w R	ALL	ALL only	2) Assoc w RI
EMB	embB	406	embB_G406A	embB_G406A	1.56896	0	1.96733	TRUE	120	176	0.595	(43.9 - 56.9)	Assoc w R	ALL+WHO		1) Assoc w R
ETH	fabG1	-8	fabG1_t-8a	inhA_t-770a fabG1_t-8a	1.55507	6.435e-07	2.02646	TRUE	18	42	0.7	(7.5 - 43.7)	Uncert. Sig.	ALL+WHO	WHO-end. gDST	2) Assoc w RI
EMB	embB	406	embB_G406S	embB_G406S	1.44001	0	1.96733	TRUE	46	79	0.632	(31.5 - 54.1)	Assoc w R	ALL+WHO		1) Assoc w R
EMB	embB	319	embB_Y319C	embB_Y319C	1.40038	6.30831e-08	1.96733	TRUE	9	14	0.609	(28.9 - 75.6)	Assoc w R	WHO		1) Assoc w R
RIF	rpoB	435	rpoB_D435E	rpoB_D435E	1.37423	0.973122	3.27289	FALSE	0	5	1		Uncert. Sig.	ALL+WHO	RRDR	2) Assoc w RI
RIF	rpoB	446	rpoB_K446R	rpoB_K446R	1.296	0.856497	3.27289	TRUE	0	2	1		Uncert. Sig.	ALL+WHO	RRDR	2) Assoc w RI
EMB	embA	-12	embA_c-12t	embA_c-12t	1.23849	0	1.96733	TRUE	99	238	0.706	(38.5 - 53.4)	Assoc w R	ALL+WHO		1) Assoc w R
ETH	ethA	57	ethA_S57Y	ethA_S57Y	1.20892	0.00820689	2.02646	FALSE	1	11	0.917	(58.7 - 99.8)	Assoc w R	ALL	ALL only	2) Assoc w RI
EMB	embB	74	embB_L74R	embB_L74R	1.15649	0.695511	1.96733	FALSE	7	18	0.72	(50.6 - 87.9)	Assoc w R	ALL+WHO	Pass 2	2) Assoc w RI
EMB	embR	70	embR_A70S	embR_A70S	1.12552	0.662292	1.96733	FALSE	55	0	0	(0 - 6.5)	Not assoc w R	WHO		5) Not assoc w R
ETH	ethA	11	ethA_G11V	ethA_G11V	1.08507	0.121447	2.02646	TRUE	0	7	1	(54.1 - 100)	Assoc w R	ALL	ALL only	2) Assoc w RI
INH	ndh	18	ndh_V18A	ndh_V18A	1.07883	5.62484e-13	2.12067	TRUE	592	10	0.017	(0.7 - 2.8)	Not assoc w R	WHO		5) Not assoc w R
ETH	ethA	378	ethA_P378L	ethA_P378L	1.0013	0.00178091	2.02646	TRUE	31	25	0.446	(29.2 - 56.8)	Assoc w R	ALL	ALL only	2) Assoc w RI
RIF	rpoB	451	rpoB_A451V	rpoB_A451V	0.978739	0.858556	3.27289	TRUE	4	7	0.636	(0 - 60.2)	Uncert. Sig.	ALL+WHO	RRDR	2) Assoc w RI
ETH	ethA	-7	ethA_t-7c	ethA_t-7c	0.974972	0.0784916	2.02646	TRUE	39	35	0.473	(33.2 - 57.3)	Assoc w R	ALL	ALL only	2) Assoc w RI
ETH	ethA	207	ethA_R207G	ethA_R207G	0.968175	0.448483	2.02646	FALSE	12	30	0.714	(55.4 - 84.3)	Assoc w R	ALL+WHO		1) Assoc w R
ETH	ethA	704	ethA_704_indel	ethA_704_del_1_ta_t	0.942191	0.456049	2.02646	FALSE	5	11	0.688	(41.3 - 89)	Assoc w R	ALL	ALL only	2) Assoc w RI
ETH	ethA	342	ethA_342_indel	ethA_342_del_1_gt_g	0.893631	0.0104537	2.02646	TRUE	11	19	0.633	(34.9 - 75.6)	Assoc w R	ALL	ALL only	2) Assoc w RI
RIF	rpoB	434	rpoB_M434I	rpoB_M434I	0.77327	0.882762	3.27289	TRUE	3	16	0.842	(0.6 - 80.6)	Uncert. Sig.	ALL+WHO	RRDR	2) Assoc w RI
LEV	gyrB	504	gyrB_A504V	gyrB_A504V	0.751003	0.296685	1.5799	TRUE	11	8	0.421	(0 - 28.5)	Uncert. Sig.	ALL+WHO	Prev. WHO	2) Assoc w RI
INH	Rv2752c	31	Rv2752c_M31I	Rv2752c_M31I	0.74672	0.000242502	2.12067	TRUE	124	3	0.024	(0.5 - 6.7)	Not assoc w R	WHO		5) Not assoc w R
LEV	gyrA	88	gyrA_G88A	gyrA_G88A	0.68511	0.766115	1.5799	TRUE	8	8	0.5	(2.5 - 55.6)	Uncert. Sig.	ALL+WHO	Prev. WHO	2) Assoc w RI
LZD	rrl	344	rrl_c344t	rrl_c344t	0.563435	1.44454e-11	1.5846	FALSE	57	0	0	(0 - 6.3)	Not assoc w R	WHO		5) Not assoc w R
INH	Rv2752c	123	Rv2752c_P123L	Rv2752c_P123L	0.528337	0.117201	2.12067	TRUE	127	4	0.031	(0.8 - 7.6)	Not assoc w R	WHO		5) Not assoc w R
RIF	rpoB	449	rpoB_L449M	rpoB_L449M	0.51103	0.973122	3.27289	TRUE	0	9	1		Uncert. Sig.	ALL+WHO	RRDR	2) Assoc w RI
EMB	embB	1054	embB_S1054P	embB_S1054P	0.484941	0.777928	1.96733	FALSE	37	1	0.026	(0 - 9.5)	Not assoc w R	WHO		5) Not assoc w R
MXF	gyrA	463	gyrA_A463S	gyrA_A463S	0.466601	0.0715127	2.33353	FALSE	69	17	0.198	(0 - 5.2)	Not assoc w R	WHO		5) Not assoc w R
AMI	aftB	293	aftB_V293M	aftB_V293M	0.354682	0.953456	2.28427	FALSE	151	0	0	(0 - 2.4)	Not assoc w R	WHO		5) Not assoc w R
LEV	gyrA	463	gyrA_A463S	gyrA_A463S	0.348389	0.0425148	1.5799	FALSE	98	28	0.222	(0 - 3.7)	Not assoc w R	WHO		5) Not assoc w R
AMI	ccsA	27	ccsA_V27I	ccsA_V27I	0.345652	0.953456	2.28427	FALSE	138	2	0.014	(0 - 2.6)	Not assoc w R	WHO		5) Not assoc w R
EMB	embB	1082	embB_T1082A	embB_T1082A	0.331621	0.168587	1.96733	FALSE	96	99	0.508	(0 - 3.8)	Not assoc w R	WHO	Lit. (PMID 32143680)	4) Not assoc w RI
LEV	gyrA	252	gyrA_R252L	gyrA_R252L	0.329805	0.714827	1.5799	FALSE	41	2	0.047	(0 - 8.6)	Not assoc w R	WHO		5) Not assoc w R
INH	ndh	268	ndh_R268H	ndh_R268H	0.328002	0.676994	2.12067	FALSE	112	10	0.082	(2.9 - 12.7)	Not assoc w R	WHO	Lit. (PMID 32143680)	4) Not assoc w RI
INH	Rv2752c	296	Rv2752c_A296V	Rv2752c_A296V	0.324512	0.882736	2.12067	FALSE	103	3	0.028	(0 - 3.5)	Not assoc w R	WHO		5) Not assoc w R
INH	Rv2752c	300	Rv2752c_V300A	Rv2752c_V300A	0.30485	0.736299	2.12067	FALSE	75	0	0	(0 - 4.8)	Not assoc w R	WHO		5) Not assoc w R
AMI	eis	-12	eis_c-12t	eis_c-12t	0.289471	0.953456	2.28427	TRUE	288	20	0.065	(1.2 - 5.3)	Not assoc w R	WHO		5) Not assoc w R
RIF	rpoA	319	rpoA_E319K	rpoA_E319K	0.262801	0.842698	3.27289	FALSE	388	1	0.003	(0 - 0.9)	Not assoc w R	WHO		5) Not assoc w R
RIF	Rv2752c	161	Rv2752c_G161S	Rv2752c_G161S	0.210187	0.992791	3.27289	FALSE	65	1	0.015	(0 - 5.5)	Not assoc w R	WHO		5) Not assoc w R
INH	Rv1258c	414	Rv1258c_P414S	Rv1258c_P414S	0.131973	0.867629	2.12067	FALSE	129	0	0	(0 - 2.8)	Not assoc w R	WHO		5) Not assoc w R
AMI	eis	807	eis_807_indel	eis_807_del_2_ggt_g	0.129875	0.953456	2.28427	TRUE	42	0	0	(0 - 8.4)	Not assoc w R	WHO		5) Not assoc w R
RIF	Rv2752c	31	Rv2752c_M31I	Rv2752c_M31I	0.12321	0.973122	3.27289	TRUE	90	1	0.011	(0 - 6)	Not assoc w R	WHO		5) Not assoc w R
LEV	gyrA	-34	gyrA_c-34t	gyrA_c-34t	0.106498	0.942087	1.5799	FALSE	325	22	0.063	(0 - 1.1)	Not assoc w R	WHO		5) Not assoc w R
AMI	rrs	514	rrs_a514c	rrs_a514c	0.0687894	0.953456	2.28427	TRUE	180	65	0.265	(0 - 2)	Not assoc w R	WHO		5) Not assoc w R
MXF	gyrA	-34	gyrA_c-34t	gyrA_c-34t	0.0545258	0.915451	2.33353	FALSE	298	11	0.036	(0 - 1.2)	Not assoc w R	WHO		5) Not assoc w R
LEV	gyrB	301	gyrB_V301L	gyrB_V301L	0.0426664	0.942087	1.5799	TRUE	83	0	0	(0 - 4.3)	Not assoc w R	WHO		5) Not assoc w R
MXF	gyrB	301	gyrB_V301L	gyrB_V301L	-0.0008545	0.997645	2.33353	TRUE	41	0	0	(0 - 8.6)	Not assoc w R	WHO		5) Not assoc w R
RIF	rpoC	271	rpoC_D271G	rpoC_D271G	-0.0073066	0.999375	3.27289	FALSE	235	0	0	(0 - 1.6)	Not assoc w R	WHO		5) Not assoc w R
LEV	gyrA	613	gyrA_Q613E	gyrA_Q613E	-0.0150687	0.996079	1.5799	FALSE	119	5	0.04	(0 - 3.1)	Not assoc w R	WHO		5) Not assoc w R
RIF	rpoB	250	rpoB_E250G	rpoB_E250G	-0.0233591	0.999375	3.27289	FALSE	71	6	0.078	(0 - 7.5)	Not assoc w R	WHO		5) Not assoc w R
CFZ	mmpL5	696	mmpL5_F696L	mmpL5_F696L	-0.0417643	0.89899	2.21284	FALSE	210	1	0.005	(0 - 1.7)	Not assoc w R	WHO		5) Not assoc w R
AMI	eis	163	eis_V163I	eis_V163I	-0.102362	0.953456	2.28427	TRUE	211	26	0.11	(0.3 - 4)	Not assoc w R	WHO		5) Not assoc w R
EMB	embB	13	embB_N13S	embB_N13S	-0.112633	0.996289	1.96733	FALSE	214	5	0.023	(0 - 1.7)	Not assoc w R	WHO		5) Not assoc w R
RIF	Rv2752c	123	Rv2752c_P123L	Rv2752c_P123L	-0.13506	0.9876	3.27289	TRUE	151	0	0	(0 - 2.4)	Not assoc w R	WHO		5) Not assoc w R
MXF	gyrB	504	gyrB_A504V	gyrB_A504V	-0.136177	0.915451	2.33353	TRUE	4	8	0.667	(0 - 60.2)	Uncert. Sig.	ALL+WHO	FQ X-R	2) Assoc w RI
AMI	whiB6	51	whiB6_T51P	whiB6_T51P	-0.259579	0.953456	2.28427	FALSE	343	7	0.02	(0 - 1.1)	Not assoc w R	WHO		5) Not assoc w R
RIF	Rv2752c	300	Rv2752c_V300A	Rv2752c_V300A	-0.334957	0.962831	3.27289	FALSE	87	0	0	(0 - 4.2)	Not assoc w R	WHO		5) Not assoc w R
AMI	rrs	492	rrs_c492t	rrs_c492t	-0.35727	0.0122911	2.28427	TRUE	212	4	0.019	(0.5 - 4.7)	Not assoc w R	WHO		5) Not assoc w R
MXF	gyrA	80	gyrA_T80A	gyrA_T80A	-0.400043	0.912179	2.33353	FALSE	9	0	0	(0 - 33.6)	Uncert. Sig.	ALL+WHO	Lit. (PMID 28137812)	4) Not assoc w RI
EMB	embA	951	embA_E951D	embA_E951D	-0.418374	0.0464681	1.96733	FALSE	37	4	0.098	(0 - 9.5)	Not assoc w R	WHO	Lit. (PMID 32143680)	4) Not assoc w RI
RIF	rpoC	906	rpoC_P906A	rpoC_P906A	-0.418465	0.973122	3.27289	FALSE	165	0	0	(0 - 2.2)	Not assoc w R	WHO		5) Not assoc w R
AMI	whiB6	107	whiB6_R107C	whiB6_R107C	-0.419143	0.953456	2.28427	TRUE	270	2	0.007	(0 - 1.4)	Not assoc w R	WHO		5) Not assoc w R
EMB	embA	206	embA_V206M	embA_V206M	-0.440061	0.667498	1.96733	TRUE	1330	59	0.042	(0 - 0.3)	Not assoc w R	WHO		5) Not assoc w R
LEV	gyrA	80	gyrA_T80A	gyrA_T80A	-0.478146	0.942087	1.5799	TRUE	16	0	0	(0 - 20.6)	Uncert. Sig.	ALL+WHO	Prev. WHO	4) Not assoc w RI
RIF	rpoC	1092	rpoC_E1092D	rpoC_E1092D	-0.478353	0.0393791	3.27289	TRUE	540	21	0.037	(2.1 - 5.3)	Not assoc w R	WHO		5) Not assoc w R
AMI	rrs	517	rrs_c517t	rrs_c517t	-0.483237	0.156503	2.28427	TRUE	163	21	0.114	(0 - 2.2)	Not assoc w R	WHO		5) Not assoc w R
RIF	Rv2752c	296	Rv2752c_A296V	Rv2752c_A296V	-0.520511	0.966324	3.27289	FALSE	123	0	0	(0 - 3)	Not assoc w R	WHO		5) Not assoc w R
LEV	gyrB	403	gyrB_A403S	gyrB_A403S	-0.533758	0.942087	1.5799	TRUE	40	0	0	(0 - 8.8)	Not assoc w R	WHO		5) Not assoc w R
AMI	whiB7	-100	whiB7_t-100c	whiB7_t-100c	-0.545556	0.0323979	2.28427	FALSE	104	0	0	(0 - 3.5)	Not assoc w R	WHO		5) Not assoc w R
RIF	rpoC	621	rpoC_A621T	rpoC_A621T	-0.607651	0.53844	3.27289	FALSE	513	2	0.004	(0 - 0.7)	Not assoc w R	WHO		5) Not assoc w R
INH	Rv2752c	435	Rv2752c_K435E	Rv2752c_K435E	-0.692021	0.854006	2.12067	FALSE	54	1	0.018	(0 - 6.6)	Not assoc w R	WHO		5) Not assoc w R
MXF	gyrA	88	gyrA_G88A	gyrA_G88A	-1.02156	0.583382	2.33353	TRUE	9	4	0.308	(0.3 - 44.5)	Uncert. Sig.	ALL+WHO	FQ X-R	2) Assoc w RI
RIF	rpoB	437	rpoB_N437D	rpoB_N437D	-1.13368	0.681673	3.27289	TRUE	2	13	0.867	(0 - 84.2)	Uncert. Sig.	ALL+WHO	RRDR	2) Assoc w RI
RIF	rpoB	450	rpoB_S450V	rpoB_S450V	-1.17089	0.992791	3.27289	FALSE	1	2	0.667	(0 - 97.5)	Uncert. Sig.	ALL+WHO	RRDR	2) Assoc w RI
EMB	embB	213	embB_R213Q	embB_R213Q	-1.3976	0.464217	1.96733	FALSE	117	0	0	(0 - 3.1)	Not assoc w R	WHO		5) Not assoc w R
RIF	rpoB	2546	rpoB_2546_indel	rpoB_2546_ins_6_g_gcgagga	-1.51685	0.670124	3.27289	FALSE	55	0	0	(0 - 6.5)	Not assoc w R	WHO		5) Not assoc w R
RIF	rpoB	944	rpoB_K944E	rpoB_K944E	-1.6556	0.937501	3.27289	FALSE	54	1	0.018	(0 - 6.6)	Not assoc w R	WHO		5) Not assoc w R
INH	Rv1258c	243	Rv1258c_E243A	Rv1258c_E243A	-1.71753	0.34289	2.12067	FALSE	54	0	0	(0 - 6.6)	Not assoc w R	WHO		5) Not assoc w R
RIF	rpoB	437	rpoB_N437S	rpoB_N437S	-1.96093	0.670124	3.27289	TRUE	1	2	0.667	(0 - 97.5)	Uncert. Sig.	ALL+WHO	RRDR	2) Assoc w RI
INH	ndh	313	ndh_G313R	ndh_G313R	-1.99505	0.183913	2.12067	FALSE	71	1	0.014	(0 - 5.1)	Not assoc w R	WHO		5) Not assoc w R
RIF	rpoB	427	rpoB_T427I	rpoB_T427I	-2.24191	0.640334	3.27289	FALSE	0	4	1		Uncert. Sig.	ALL+WHO	RRDR	2) Assoc w RI
RIF	rpoC	69	rpoC_R69P	rpoC_R69P	-2.31261	0.0211634	3.27289	FALSE	80	0	0	(0 - 4.5)	Not assoc w R	WHO		5) Not assoc w R

## Sheet: TableS9
Table S9. Genomic positions of genes used in this study. H37Rv v3 was used for calculating positions.
Gene	Start Position	End Position	Strand
katG	2153888	2156111	-1
fabG1	1673439	1674183	1
inhA	1674201	1675011	1
ahpC	2726192	2726780	1
ndh	2101650	2103042	-1
kasA	2518114	2519365	1
Rv1258c	1406080	1407340	-1
Rv2752c	3064514	3066191	-1
ethA	4326003	4327473	-1
ethR	4327548	4328199	1
fabG1	1673439	1674183	1
inhA	1674201	1675011	1
mshA	575347	576790	1
Rv3083	3448503	3449991	1
Rv0565c	656009	657470	-1
rpoA	3877463	3878507	-1
rpoB	759806	763325	1
rpoC	763369	767320	1
rpoZ	1565092	1565425	1
Rv2752c	3064514	3066191	-1
embA	4243232	4246517	1
embB	4246513	4249810	1
embC	4239862	4243147	1
embR	1416180	1417347	-1
rmlD	3646894	3647809	-1
iniA	410837	412760	1
iniC	412756	414238	1
manB	3644897	3645977	-1
ubiA	4268924	4269833	-1
rrs	1471845	1473382	1
eis	2714123	2715332	-1
ccsA	619890	620865	1
whiB6	4338170	4338521	-1
whiB7	3568400	3568679	-1
aftB	4266952	4268836	-1
fprA	3474006	3475377	1
gyrA	7301	9818	1
gyrB	5239	7267	1
atpE	1461044	1461290	1
Rv0678	778989	779487	1
mmpL5	775585	778480	-1
mmpS5	778476	778905	-1
pepQ	2859299	2860418	-1
Rv3249c	3629751	3630387	-1
rplC	800808	801462	1
rrl	1473657	1476795	1
Rv3249c	3629751	3630387	-1
ddn	3986843	3987299	1
fgd1	490782	491793	1
fbiA	3640542	3641538	1
fbiB	3641534	3642881	1
fbiC	1302930	1305501	1
fbiD	3339117	3339762	1
Rv3249c	3629751	3630387	-1

## Sheet: Table S10
TABLE S10: Interaction coefficients for co-occuring mutations associated with resistance. Interaction coefficients are shown for mutations with significant individual effects that also co-occurred at least 5 times.
DRUG	MUT2	MUT1	INTERACTION_COEF	SE	Z	P	COUNTS	ci_hi	ci_lo	BH_PVAL	LINEAGE	HOMOPLASY	SOLO_COEF1	SOLO_COEF2
EMB	embR_L217V	embB_M306V	-1.34496	0.678488	-1.98229	0.0474462	6	-0.0151271	-2.6748	0.0677803	[2, 4]	TRUE	1.72124	-0.538023
EMB	embB_Q497R	embA_c-12t	-1.01525	0.457364	-2.21978	0.0264339	17	-0.118813	-1.91168	0.0406675	[4]	FALSE	2.03851	1.48315
EMB	embB_R741R	embB_G406A	-0.909362	0.698478	-1.30192	0.192944	7	0.459655	-2.27838	0.253874	[4]	FALSE	1.88856	1.09946
EMB	embB_D1024N	embB_M306V	-0.85333	0.42611	-2.00261	0.0452196	7	-0.0181549	-1.6885	0.0655357	[3, 2, 4]	TRUE	1.72124	1.90815
EMB	embB_G406D	embB_M306I	-0.820368	0.525689	-1.56056	0.118628	9	0.209983	-1.85072	0.162505	[3, 2]	TRUE	2.16227	1.54689
EMB	embB_M306I	embA_c-11a	-0.730372	0.429442	-1.70075	0.0889904	5	0.111334	-1.57208	0.125339	[3, 2, 4]	TRUE	1.24549	2.16227
EMB	embB_G406S	embA_c-12t	-0.466175	0.431054	-1.08148	0.279485	8	0.378691	-1.31104	0.358314	[2]	FALSE	2.03851	1.37401
EMB	embB_M306V	embA_c-12t	-0.399777	0.605893	-0.659814	0.509373	12	0.787774	-1.58733	0.585486	[3, 2]	TRUE	2.03851	1.72124
EMB	embB_R741R	embB_M306I	-0.341029	0.734079	-0.464568	0.642241	10	1.09776	-1.77982	0.705759	[4]	FALSE	2.16227	1.09946
EMB	embB_D1024N	embB_M306I	-0.307672	0.352782	-0.872131	0.383137	21	0.383781	-0.999125	0.46724	[4, 3, 2]	TRUE	2.16227	1.90815
EMB	embB_E405D	embA_c-16g	-0.207777	0.631963	-0.328779	0.742322	5	1.03087	-1.44642	0.789705		FALSE	1.25449	1.55835
EMB	embR_L217V	embB_D354A	-0.138304	0.514527	-0.268798	0.788085	23	0.87017	-1.14678	0.829563	[4]	FALSE	3.92371	-0.538023
EMB	embR_L217V	embB_M306I	-0.120582	0.342004	-0.352575	0.724407	7	0.549746	-0.79091	0.778932	[4]	FALSE	2.16227	-0.538023
EMB	embB_M306V	embA_c-11a	-0.0120629	0.503327	-0.0239664	0.980879	56	0.974458	-0.998584	0.980879	[2, 4]	TRUE	1.24549	1.72124
EMB	embB_M306I	embA_c-12t	0.155406	0.857744	0.18118	0.856226	9	1.83658	-1.52577	0.8737	[4, 3]	TRUE	2.03851	2.16227
EMB	embB_M306I	embA_c-16g	0.333194	0.620271	0.537175	0.591147	10	1.54893	-0.882538	0.66421	[4, 2]	TRUE	1.25449	2.16227
EMB	ubiA_M180V	embB_M306I	0.421235	0.593231	0.710068	0.477662	6	1.58397	-0.741499	0.561955		FALSE	2.16227	1.74889
EMB	embB_Q497K	embB_M306I	0.453437	0.495552	0.915014	0.360185	28	1.42472	-0.517845	0.444672	[4, 2]	TRUE	2.16227	3.90697
EMB	embC_R345R	embB_M306I	0.578778	0.613585	0.943273	0.345541	5	1.7814	-0.623848	0.431927	[4]	FALSE	2.16227	1.30922
EMB	embB_M306I	embA_c-16a	0.940005	0.685855	1.37056	0.170513	6	2.28428	-0.404271	0.230422		FALSE	1.92516	2.16227
EMB	embB_Q497R	embB_M306I	1.43272	0.559021	2.56292	0.0103797	5	2.5284	0.337043	0.0175927	[4]	FALSE	2.16227	1.48315
EMB	embB_Q497R	embA_g-43c	1.46432	1.106	1.32398	0.185511	9	3.63208	-0.703442	0.247348	[4]	FALSE	1.55151	1.48315
EMB	embB_Q497R	embA_-44_indel	1.65657	0.469276	3.53005	0.0004155	13	2.57635	0.73679	0.00122206	[2]	FALSE	1.7075	1.48315
EMB	embB_M306V	embA_g-43c	1.9337	0.560074	3.45259	0.0005552	10	3.03145	0.835959	0.00158629	[2, 3]	TRUE	1.55151	1.72124
INH	inhA_S94A	ahpC_c-72t	-5.8292	1.51098	-3.8579	0.0001144	6	-2.86768	-8.79072	0.000298435	[4]	FALSE	6.4241	2.97969
INH	katG_S315T	ahpC_c-54t	-4.15649	1.16818	-3.55809	0.0003736	5	-1.86685	-6.44613	0.000830222		FALSE	6.86787	6.15145
INH	katG_S315T	ahpC_g-51a	-3.36603	0.846005	-3.97874	6.93e-05	12	-1.70786	-5.0242	0.000198	[4, 2]	TRUE	4.62156	6.15145
INH	katG_S315T	ahpC_g-48a	-2.87565	0.584004	-4.92403	8.48e-07	20	-1.73101	-4.0203	3.18e-06	[4, 1]	TRUE	3.11005	6.15145
INH	Rv2752c_M31I	fabG1_c-15t	-2.46802	1.4103	-1.75	0.0801188	8	0.296167	-5.23221	0.100149	[4]	FALSE	3.21302	0.718436
INH	fabG1_c-15t	ahpC_c-52t	-2.11193	0.869062	-2.43013	0.0150936	5	-0.408569	-3.81529	0.0210608	[2]	FALSE	2.91345	3.21302
INH	inhA_S94A	fabG1_c-15t	-2.0179	0.746742	-2.70226	0.0068869	10	-0.55428	-3.48151	0.0106997	[1, 2, 3]	TRUE	3.21302	2.97969
INH	inhA_I194T	fabG1_c-15t	-1.91544	1.13332	-1.69012	0.0910058	23	0.305864	-4.13675	0.112584	[2, 4, 1, 3]	TRUE	3.21302	3.94474
INH	katG_S315T	fabG1_t-8a	-1.60965	0.739238	-2.17744	0.0294475	37	-0.160742	-3.05856	0.0401557	[2, 4]	TRUE	3.29912	6.15145
INH	katG_S315T	ahpC_c-52t	-1.57913	0.852668	-1.85199	0.0640271	8	0.0920953	-3.25036	0.0817367	[4]	FALSE	2.91345	6.15145
INH	ndh_V18A	fabG1_c-15t	-1.46689	0.552539	-2.65482	0.0079351	14	-0.383915	-2.54987	0.0119027	[4]	FALSE	3.21302	0.912209
INH	katG_S315T	inhA_S94A	-1.07745	0.642613	-1.67667	0.0936061	13	0.182069	-2.33697	0.11462	[2, 4]	TRUE	2.97969	6.15145
INH	Rv2752c_M31I	inhA_I21T	-0.806338	1.93234	-0.417285	0.67647	7	2.98105	-4.59373	0.718375	[4]	FALSE	1.83494	0.718436
INH	ndh_R268H	katG_S315T	-0.644392	0.506075	-1.27331	0.202907	16	0.347515	-1.6363	0.238714		FALSE	6.15145	0.439093
INH	ndh_V18A	inhA_S94A	-0.458535	0.834919	-0.549198	0.58287	5	1.17791	-2.09498	0.624503	[4]	FALSE	2.97969	0.912209
INH	katG_S315T	fabG1_t-8c	-0.36571	0.634316	-0.576542	0.564249	74	0.877549	-1.60897	0.615184	[2, 4, 1, 3]	TRUE	2.46961	6.15145
INH	inhA_I21V	fabG1_c-15t	-0.245041	0.86988	-0.281695	0.778177	6	1.45992	-1.95001	0.805011	[1, 4, 2]	TRUE	3.21302	1.44798
INH	ndh_R268H	fabG1_L203L	-0.113057	1.22535	-0.0922648	0.926488	21	2.28863	-2.51474	0.934273		FALSE	2.44837	0.439093
INH	katG_S315T	fabG1_c-15t	-0.0420713	0.136556	-0.308088	0.758015	567	0.225579	-0.309721	0.797911	[4, 2, 3, 1]	TRUE	3.21302	6.15145
INH	inhA_I194T	fabG1_L203L	0.0220378	1.75616	0.0125488	0.989988	19	3.46412	-3.42004	0.989988	[1]	FALSE	2.44837	3.94474
INH	katG_S315T	fabG1_L203L	0.103131	0.350676	0.294091	0.768688	52	0.790457	-0.584195	0.802109	[2, 3, 1, 4]	TRUE	2.44837	6.15145
INH	ndh_R268H	fabG1_c-15t	0.132925	0.528752	0.251393	0.80151	16	1.16928	-0.90343	0.822062		FALSE	3.21302	0.439093
INH	ndh_V18A	katG_S315T	0.19932	0.27824	0.71636	0.473769	70	0.744669	-0.34603	0.521581	[4]	FALSE	6.15145	0.912209
INH	katG_S315T	fabG1_g-17t	0.478707	0.469271	1.02011	0.307678	150	1.39848	-0.441065	0.351632	[2, 4, 3]	TRUE	2.00567	6.15145
INH	inhA_I21T	fabG1_c-15t	0.594295	1.04361	0.569458	0.569045	43	2.63978	-1.45119	0.615184	[4, 1, 2]	TRUE	3.21302	1.83494
INH	katG_S315T	inhA_G3G	0.679658	0.357333	1.90203	0.0571674	36	1.38003	-0.0207152	0.0745662	[2]	FALSE	-1.13016	6.15145
INH	Rv2752c_M31I	katG_S315T	0.816208	0.576582	1.4156	0.156893	14	1.94631	-0.313893	0.186408	[4]	FALSE	6.15145	0.718436
INH	katG_S315T	fabG1_V221V	1.07927	1.16531	0.926168	0.354359	5	3.36327	-1.20473	0.401161		FALSE	2.03781	6.15145
INH	ndh_R268H	inhA_S94A	2.7916	0.847121	3.2954	0.0009828	8	4.45196	1.13124	0.00206905		FALSE	2.97969	0.439093
INH	ndh_V18A	inhA_I21T	7.2491	2.68584	2.699	0.0069548	6	12.5133	1.98485	0.0106997	[4]	FALSE	1.83494	0.912209
KAN	rrs_c517t	eis_c-14t	-0.62942	0.356858	-1.76378	0.0777688	12	0.0700224	-1.32886	0.0882781	[2]	FALSE	2.81286	-0.259363
KAN	rrs_a514c	eis_c-12t	0.0437561	0.348103	0.125699	0.89997	10	0.726037	-0.638525	0.921921	[4]	FALSE	1.22185	-0.386326
KAN	rrs_a514c	eis_807_indel	0.30154	0.483169	0.624088	0.53257	7	1.24855	-0.645472	0.573537	[2]	FALSE	-0.921407	-0.386326
KAN	rrs_a1401g	rrs_a514c	0.716525	0.172285	4.15894	3.2e-05	154	1.0542	0.378846	6.10909e-05	[2, 3, 4]	TRUE	-0.386326	4.09627
LEV	gyrA_D94A	gyrA_A90V	-0.608842	0.305015	-1.99611	0.0459225	17	-0.0110125	-1.20667	0.0575709	[2, 4]	TRUE	2.65971	2.57907
LEV	gyrB_N499T	gyrA_D94G	-0.594096	0.581195	-1.0222	0.306688	7	0.545046	-1.73324	0.36121		FALSE	3.66779	1.56544
LEV	gyrB_D461N	gyrA_A90V	0.057704	0.661864	0.0871841	0.930525	6	1.35496	-1.23955	0.930525		FALSE	2.65971	2.57884
LEV	gyrA_D94G	gyrA_A90V	0.253549	0.561324	0.451699	0.651486	7	1.35374	-0.846645	0.690575	[2, 4]	TRUE	2.65971	3.66779
LEV	gyrA_L197L	gyrA_A90V	0.408812	0.492451	0.830159	0.406449	5	1.37402	-0.556392	0.458336	[4]	FALSE	2.65971	-0.439619
LEV	gyrB_A504V	gyrA_A90V	2.08662	0.765792	2.72478	0.0064344	5	3.58757	0.585663	0.00831764		FALSE	2.65971	0.191299
MXF	gyrA_D94G	gyrA_A90V	-1.58937	0.521742	-3.04628	0.0023169	8	-0.566756	-2.61198	0.00334663	[2, 4]	TRUE	2.58249	3.94014
MXF	gyrA_S91P	gyrA_A90V	-0.813911	0.673031	-1.20932	0.226539	5	0.505229	-2.13305	0.259854	[2, 4]	TRUE	2.58249	2.80581
MXF	gyrA_D94A	gyrA_A90V	-0.085653	0.393217	-0.217826	0.827565	16	0.685053	-0.856359	0.849343	[2, 4]	TRUE	2.58249	2.48077
MXF	gyrB_D461N	gyrA_A90V	1.15607	0.828925	1.39466	0.163119	5	2.78076	-0.468625	0.192777		FALSE	2.58249	1.86951
RFB	rpoC_G433S	rpoB_S450L	-7.23168	1.21308	-5.9614	2.5e-09	61	-4.85404	-9.60933	7.125e-09		FALSE	6.66952	7.25051
RFB	rpoC_P1040R	rpoB_S450L	-7.04268	0.357964	-19.6743	0	210	-6.34108	-7.74429	0		FALSE	6.66952	6.77476
RFB	rpoB_S450L	rpoB_P45S	-6.92339	1.28105	-5.40445	6.5e-08	18	-4.41252	-9.43425	1.64667e-07		FALSE	7.41231	6.66952
RFB	rpoC_N698S	rpoB_S450L	-6.91517	1.23904	-5.58107	2.39e-08	36	-4.48665	-9.34369	6.19227e-08		FALSE	6.66952	7.24888
RFB	rpoC_I491V	rpoB_S450L	-6.8696	0.480788	-14.2882	0	311	-5.92726	-7.81195	0		FALSE	6.66952	6.69153
RFB	rpoC_V483A	rpoB_S450L	-6.47868	0.384428	-16.8528	0	251	-5.7252	-7.23216	0		FALSE	6.66952	6.43683
RFB	rpoC_G519D	rpoB_S450W	-6.06135	1.94716	-3.11292	0.0018525	5	-2.24492	-9.87778	0.00293312		FALSE	6.41353	6.52652
RFB	rpoC_T812I	rpoB_S450L	-5.96856	1.41793	-4.20935	2.56e-05	21	-3.18942	-8.74771	5.30618e-05		FALSE	6.66952	6.47987
RFB	rpoC_G332S	rpoB_S450L	-5.92237	0.542651	-10.9138	0	80	-4.85878	-6.98597	0		FALSE	6.66952	6.11405
RFB	rpoC_G519D	rpoB_S450L	-5.75354	1.89783	-3.03165	0.0024322	5	-2.0338	-9.47328	0.0037469		FALSE	6.66952	6.52652
RFB	rpoC_I491T	rpoB_S450L	-5.63722	0.516322	-10.918	0	116	-4.62523	-6.64921	0		FALSE	6.66952	5.36048
RFB	rpoC_D485Y	rpoB_S450L	-4.50128	0.760711	-5.9172	3.27e-09	26	-3.01029	-5.99228	9.0922e-09		FALSE	6.66952	4.19213
RFB	rpoC_V483G	rpoB_S450L	-3.90428	0.556255	-7.01887	2.24e-12	168	-2.81402	-4.99454	7.98e-12		FALSE	6.66952	3.79964
RFB	rpoC_F452L	rpoB_S450L	-3.7812	0.929439	-4.06826	4.74e-05	38	-1.9595	-5.6029	9.31655e-05		FALSE	6.66952	4.37855
RFB	rpoC_F831L	rpoB_S450L	-3.2505	1.04922	-3.09801	0.0019482	11	-1.19403	-5.30697	0.00304239		FALSE	6.66952	3.14254
RFB	rpoB_I491L	rpoB_D435G	1.16384	1.11343	1.04527	0.295896	10	3.34615	-1.01848	0.318228		FALSE	-0.0690753	3.07628
RFB	rpoB_L452P	rpoB_D435G	3.30147	0.788647	4.18625	2.84e-05	10	4.84722	1.75572	5.78143e-05	[4, 2]	TRUE	-0.0690753	2.29394
RFB	rpoB_D435G	rpoB_L430P	3.78549	0.81895	4.62237	3.79e-06	7	5.39064	2.18035	8.30885e-06	[2, 4]	TRUE	0.572723	-0.0690753
RIF	rpoC_P601L:Rv2752c_A520A	rpoB_L430P	-2.6009	0.906991	-2.86761	0.0041359	7	-0.823194	-4.3786	0.00520553	[1]	FALSE	2.767	-1.02501
RIF	rpoC_E1092D	rpoB_L452P	0.421388	0.824811	0.51089	0.609428	7	2.03802	-1.19524	0.609428		FALSE	3.62257	-1.2079
RIF	rpoB_L452P	rpoB_D435G	0.677909	1.07071	0.633139	0.526643	10	2.7765	-1.42068	0.533957	[4, 2]	TRUE	3.27885	3.62257
RIF	rpoC_P601L:Rv2752c_A520A	rpoB_S450L	0.809198	0.556159	1.45498	0.145676	20	1.89927	-0.280873	0.166161	[1]	FALSE	8.07906	-1.02501
RIF	rpoC_P601L:Rv2752c_A520A	rpoB_S450W	0.963471	1.07929	0.892688	0.372024	6	3.07889	-1.15194	0.387968	[1]	FALSE	7.90692	-1.02501
RIF	rpoC_E1092D	rpoB_S450L	1.10958	0.31816	3.48748	0.0004876	140	1.73317	0.485983	0.000757336	[2]	FALSE	8.07906	-1.2079
RIF	rpoB_D435G	rpoB_L430P	2.4392	1.13816	2.14311	0.0321045	8	4.67	0.208406	0.0372005	[2, 4, 3]	TRUE	2.767	3.27885
RIF	rpoB_I491L	rpoB_D435G	3.68758	1.64475	2.24203	0.0249595	17	6.9113	0.463868	0.0293878	[2, 3]	TRUE	3.27885	1.34919
